# Supplementary material
Source: publisher figshare collection journal article supplement (https://acs.figshare.com/ndownloader/files/4208677)
Supplement: Supplementary file 1 [file 4208677]

#==============================================================================
data_global
#==============================================================================

_publ_requested_journal            'Org. Lett.'
_publ_contact_author               'Stephen G. Davies'
_publ_contact_author_phone         '+44 1865 275695'
_publ_contact_author_fax           '+44 1865 275633'
_publ_contact_author_email          steve.davies@chem.ox.ac.uk

loop_
_publ_author_name
_publ_author_address
'Davies, Stephen G.'
;                                                                               
Department of Chemistry
Chemistry Research Laboratory
University of Oxford
Mansfield Road
Oxford
OX1 3TA
U.K.
;
'Lee, James A.'
;                                                                               
Department of Chemistry
Chemistry Research Laboratory
University of Oxford
Mansfield Road
Oxford
OX1 3TA
U.K.
;
'Roberts, Paul M.'
;                                                                               
Department of Chemistry
Chemistry Research Laboratory
University of Oxford
Mansfield Road
Oxford
OX1 3TA
U.K.
;
'Thomson, James E.'
;                                                                               
Department of Chemistry
Chemistry Research Laboratory
University of Oxford
Mansfield Road
Oxford
OX1 3TA
U.K.
;
'Yin, Jingda'
;                                                                               
Department of Chemistry
Chemistry Research Laboratory
University of Oxford
Mansfield Road
Oxford
OX1 3TA
U.K.
;
_journal_name_full                 'Org. Lett.'
_journal_volume                    '?'
_journal_page_first                '?'
_journal_page_last                 '?'
_journal_year                      '?'
_ccdc_journal_depnumbers           '?'

_publ_section_title
;
 Parallel Kinetic Resolution of Acyclic \g-Amino-\a,\b-unsaturated Esters: 
 Application to the Asymmetric Synthesis of 4-Aminopyrrolidin-2-ones
;
_publ_section_abstract
;  
 Conjugate addition of a 50:50 pseudoenantiomeric mixture of lithium (R)-N-benzyl-
 N-(\a-methylbenzyl)amide and lithium (S)-N-3,4-dimethoxybenzyl-N-(\a-methylbenzyl)amide 
 to a range of racemic acyclic \g-amino-\a,\b-unsaturated esters (derived from the 
 corresponding \a-amino acids) effects their efficient parallel kinetic resolution, 
 allowing the preparation of enantiopure \b,\g-diamino esters. The \b,\g-diamino ester 
 products of these reactions are readily converted into the corresponding substituted 
 4-aminopyrrolidin-2-ones via N-debenzylation and cyclisation.
;

#==============================================================================
data_22 
_ccdc_journal_depnumber            '852571'
#==============================================================================

_refine_special_details
;
The crystal used was relatively poor quality and weakly diffracting; the higher 
angle data were therefore very weak. 
;

_cell_length_a                    5.83270(10)
_cell_length_b                    10.1818(2)
_cell_length_c                    33.8568(8)
_cell_angle_alpha                 90
_cell_angle_beta                  94.4233(8)
_cell_angle_gamma                 90
_cell_volume                      2004.68(7)
 
_symmetry_cell_setting            'Monoclinic' 
_symmetry_space_group_name_H-M    'P 1 21/n 1' 
_symmetry_space_group_name_Hall   '-P 2yn' 
loop_
 _symmetry_equiv_pos_as_xyz
 'x,y,z'
 '-x,-y,-z'
 '-x+1/2,y+1/2,-z+1/2'
 'x+1/2,-y+1/2,z+1/2'

loop_
_atom_type_symbol
_atom_type_scat_dispersion_real
_atom_type_scat_dispersion_imag
_atom_type_scat_Cromer_Mann_a1
_atom_type_scat_Cromer_Mann_b1
_atom_type_scat_Cromer_Mann_a2
_atom_type_scat_Cromer_Mann_b2
_atom_type_scat_Cromer_Mann_a3
_atom_type_scat_Cromer_Mann_b3
_atom_type_scat_Cromer_Mann_a4
_atom_type_scat_Cromer_Mann_b4
_atom_type_scat_Cromer_Mann_c
_atom_type_scat_source  
 C       0.0033   0.0016   2.3100  20.8439   1.0200  10.2075   1.5886   0.5687
   0.8650  51.6512   0.2156 'International Tables Vol C 4.2.6.8 and 6.1.1.4'
 H       0.0000   0.0000   0.4930  10.5109   0.3229  26.1257   0.1402   3.1424
   0.0408  57.7998   0.0030 'International Tables Vol C 4.2.6.8 and 6.1.1.4'
 N       0.0061   0.0033  12.2126   0.0057   3.1322   9.8933   2.0125  28.9975
   1.1663   0.5826 -11.5290 'International Tables Vol C 4.2.6.8 and 6.1.1.4'
 O       0.0106   0.0060   3.0485  13.2771   2.2868   5.7011   1.5463   0.3239
   0.8670  32.9089   0.2508 'International Tables Vol C 4.2.6.8 and 6.1.1.4'
 
_cell_formula_units_Z                    4

# Given Formula = C23 H29 N1 O2 
# Dc =      1.16 Fooo =    760.00 Mu =      0.73 M =    351.49
# Found Formula = C23 H29 N1 O2 
# Dc =      1.16 FOOO =    760.00 Mu =      0.73 M =    351.49

_chemical_formula_sum             'C23 H29 N1 O2'
_chemical_formula_moiety          'C23 H29 N1 O2'
_chemical_compound_source                .
_chemical_formula_weight            351.49
 
_cell_measurement_reflns_used         3022
_cell_measurement_theta_min              5
_cell_measurement_theta_max             24
_cell_measurement_temperature          150
 
_exptl_crystal_description        'plate' 
_exptl_crystal_colour             'colourless' 
_exptl_crystal_size_min           0.090 
_exptl_crystal_size_mid           0.180 
_exptl_crystal_size_max           0.200 
 
_exptl_crystal_density_diffrn     1.165 
_exptl_crystal_density_meas       . 
_exptl_crystal_density_method     'not measured' 
# Non-dispersive F(000): 
_exptl_crystal_F_000              760 
_exptl_absorpt_coefficient_mu     0.073 
 
# Sheldrick geometric approximatio 0.99 0.99 
# No experimental values of Tmin/max available 
_exptl_absorpt_correction_type    multi-scan 
_exptl_absorpt_process_details    'DENZO/SCALEPACK (Otwinowski & Minor, 1997)' 
_exptl_absorpt_correction_T_min   0.99 
_exptl_absorpt_correction_T_max   0.99 
# For a Kappa CCD, set Tmin to 1.0 and 
# Tmax to the ratio of max:min frame scales in scale_all.log 
_diffrn_measurement_device_type   'Nonius KappaCCD' 
_diffrn_measurement_device        'Area' 
_diffrn_radiation_monochromator   'graphite' 
_diffrn_radiation_type            'Mo K\a'
_diffrn_radiation_wavelength           0.71073
_diffrn_measurement_method        \w 
 
# If a reference occurs more than once, delete the author 
# and date from subsequent references. 
_computing_data_collection        'COLLECT (Nonius, 2001).' 
_computing_cell_refinement        'DENZO/SCALEPACK (Otwinowski & Minor, 1997)' 
_computing_data_reduction         'DENZO/SCALEPACK (Otwinowski & Minor, 1997)' 
_computing_structure_solution     'SIR92 (Altomare et al., 1994)' 
_computing_structure_refinement   'CRYSTALS (Betteridge et al., 2003)' 
_computing_publication_material   'CRYSTALS (Betteridge et al., 2003)' 
_computing_molecular_graphics     'CAMERON (Watkin et al., 1996)' 
 
_diffrn_standards_interval_time   . 
_diffrn_standards_interval_count  . 
_diffrn_standards_number          0 
_diffrn_standards_decay_%         . 
 
_diffrn_ambient_temperature        150
_diffrn_reflns_number             5471 
_reflns_number_total              3055 
_diffrn_reflns_av_R_equivalents   0.037 
# Number of reflections without Friedels Law is 0 
# Number of reflections with Friedels Law is 3055 
# Theoretical number of reflections is about 6173 
 
_diffrn_reflns_theta_min          5.202 
_diffrn_reflns_theta_max          23.834 
_diffrn_measured_fraction_theta_max 0.986 
 
_diffrn_reflns_theta_full         23.119 
_diffrn_measured_fraction_theta_full 0.987 
 
_diffrn_reflns_limit_h_min        -6 
_diffrn_reflns_limit_h_max        6 
_diffrn_reflns_limit_k_min        -10 
_diffrn_reflns_limit_k_max        11 
_diffrn_reflns_limit_l_min        -38 
_diffrn_reflns_limit_l_max        38 
_reflns_limit_h_min               -6 
_reflns_limit_h_max               6 
_reflns_limit_k_min               0 
_reflns_limit_k_max               11 
_reflns_limit_l_min               0 
_reflns_limit_l_max               38 
 
_oxford_diffrn_Wilson_B_factor    2.85 
_oxford_diffrn_Wilson_scale       4.60 
 
_atom_sites_solution_primary      direct #heavy,direct,difmap,geom
# _atom_sites_solution_secondary  difmap
_atom_sites_solution_hydrogens    geom
 
_refine_diff_density_min          -0.29 
_refine_diff_density_max          0.30 
 
# The current dictionary definitions do not cover the 
# situation where the reflections used for refinement were 
# selected by a user-defined sigma threshold 
 
# The values actually used during refinement 
_oxford_reflns_threshold_expression_ref     I>-3.0\s(I)
_refine_ls_number_reflns          3055 
_refine_ls_number_restraints      0 
_refine_ls_number_parameters      235 
_oxford_refine_ls_R_factor_ref    0.0781 
_refine_ls_wR_factor_ref          0.1481 
_refine_ls_goodness_of_fit_ref    1.0178 
_refine_ls_shift/su_max           0.0003052 
_refine_ls_shift/su_mean          0.0000256 
 
# The values computed from all data 
_oxford_reflns_number_all         3055 
_refine_ls_R_factor_all           0.0781 
_refine_ls_wR_factor_all          0.1481 
 
# The values computed with a 2 sigma cutoff - a la SHELX 
_reflns_threshold_expression      I>2.0\s(I)
_reflns_number_gt                 2402 
_refine_ls_R_factor_gt            0.0593 
_refine_ls_wR_factor_gt           0.1385 
 
# choose from: rm (reference molecule of known chirality), 
# ad (anomolous dispersion - Flack), rmad (rm and ad), 
# syn (from synthesis), unk (unknown) or . (not applicable). 
_chemical_absolute_configuration  '.' 
 
_refine_ls_structure_factor_coef  Fsqd 
_refine_ls_matrix_type            full
_refine_ls_hydrogen_treatment     none           # none, undef, noref, refall,
                                                 # refxyz, refU, constr or mixed
_refine_ls_weighting_scheme       calc 
_refine_ls_weighting_details 
;
 Method= Modified Sheldrick 
 w=1/[\s^2^(F^2^) + ( 0.05P)^2^ + 2.06P] 
 ,where P=(max(Fo^2^,0) + 2Fc^2^)/3 
;
# Insert your own references if required - in alphabetical order 
_publ_section_references 
; 
Altomare, A., Cascarano, G., Giacovazzo, C., Guagliardi, A., Burla, M.C., 
Polidori, G. & Camalli, M. (1994). J. Appl. Cryst. 27, 435. 
 
Betteridge, P.W., Carruthers, J.R., Cooper, R.I., 
Prout, K. & Watkin, D.J. (2003). J. Appl. Cryst. 36, 1487. 
 
Nonius (2001). COLLECT. Nonius BV, Delft, The Netherlands. 
 
Otwinowski, Z. & Minor, W. (1997). Methods in Enzymology, Vol. 276, 
edited by C. W. Carter Jr & R. M. Sweet, pp. 307--326. 
New York: Academic Press. 
 
Watkin, D.J., Prout, C.K. & Pearce, L.J. (1996). CAMERON, Chemical 
Crystallography Laboratory, Oxford, UK. 
; 

# Uequiv = arithmetic mean of Ui i.e. Ueqiv = (U1+U2+U3)/3

# Replace last . with number of unfound hydrogen atomsattached to an atom.

# ..._refinement_flags_... 
# . no refinement constraints           S special position constraint on site
# G rigid group refinement of site      R riding atom
# D distance or angle restraint on site T thermal displacement constraints
# U Uiso or Uij restraint (rigid bond)  P partial occupancy constraint

loop_
_atom_site_label
_atom_site_type_symbol
_atom_site_fract_x
_atom_site_fract_y
_atom_site_fract_z
_atom_site_U_iso_or_equiv
_atom_site_occupancy
_atom_site_adp_type
_atom_site_refinement_flags_posn
_atom_site_refinement_flags_adp
_atom_site_refinement_flags_occupancy
_atom_site_disorder_assembly
_atom_site_disorder_group
_oxford_atom_site_special_shape
_atom_site_attached_hydrogens
O1 O -0.1686(3) 0.25833(17) 0.45704(5) 0.0379 1.0000 Uani . . . . . . . 
C2 C -0.1754(4) 0.3660(3) 0.43413(8) 0.0368 1.0000 Uani . . . . . . . 
O3 O -0.2873(3) 0.46378(19) 0.43955(6) 0.0472 1.0000 Uani . . . . . . . 
C4 C -0.0284(4) 0.3493(3) 0.40056(8) 0.0385 1.0000 Uani . . . . . . . 
C5 C -0.0044(4) 0.4475(3) 0.37550(7) 0.0362 1.0000 Uani . . . . . . . 
C6 C 0.1295(5) 0.4518(2) 0.33943(8) 0.0374 1.0000 Uani . . . . . . . 
N7 N 0.2209(4) 0.5868(2) 0.33625(6) 0.0357 1.0000 Uani . . . . . . . 
C8 C 0.2979(5) 0.6165(3) 0.29698(8) 0.0394 1.0000 Uani . . . . . . . 
C9 C 0.1034(4) 0.6138(3) 0.26492(7) 0.0377 1.0000 Uani . . . . . . . 
C10 C 0.0957(5) 0.5211(3) 0.23479(8) 0.0441 1.0000 Uani . . . . . . . 
C11 C -0.0851(5) 0.5175(3) 0.20582(8) 0.0497 1.0000 Uani . . . . . . . 
C12 C -0.2603(5) 0.6075(3) 0.20630(9) 0.0535 1.0000 Uani . . . . . . . 
C13 C -0.2553(5) 0.7017(3) 0.23590(8) 0.0505 1.0000 Uani . . . . . . . 
C14 C -0.0750(5) 0.7045(3) 0.26494(8) 0.0434 1.0000 Uani . . . . . . . 
C15 C 0.4031(5) 0.6153(3) 0.36711(8) 0.0393 1.0000 Uani . . . . . . . 
C16 C 0.4265(4) 0.7606(2) 0.37673(7) 0.0355 1.0000 Uani . . . . . . . 
C17 C 0.2456(5) 0.8480(3) 0.36936(8) 0.0391 1.0000 Uani . . . . . . . 
C18 C 0.2721(5) 0.9799(3) 0.37926(8) 0.0430 1.0000 Uani . . . . . . . 
C19 C 0.4788(5) 1.0259(3) 0.39647(8) 0.0455 1.0000 Uani . . . . . . . 
C20 C 0.6583(5) 0.9400(3) 0.40458(8) 0.0453 1.0000 Uani . . . . . . . 
C21 C 0.6324(5) 0.8082(3) 0.39468(8) 0.0424 1.0000 Uani . . . . . . . 
C22 C 0.3063(5) 0.3419(3) 0.33762(9) 0.0468 1.0000 Uani . . . . . . . 
C23 C -0.2873(4) 0.2555(3) 0.49431(8) 0.0380 1.0000 Uani . . . . . . . 
C24 C -0.2214(5) 0.1219(3) 0.51118(9) 0.0500 1.0000 Uani . . . . . . . 
C25 C -0.1923(5) 0.3630(3) 0.52172(8) 0.0505 1.0000 Uani . . . . . . . 
C26 C -0.5450(5) 0.2642(3) 0.48534(9) 0.0496 1.0000 Uani . . . . . . . 
H41 H 0.0514 0.2688 0.3969 0.0432 1.0000 Uiso R . . . . . . 
H51 H -0.0825 0.5270 0.3822 0.0423 1.0000 Uiso R . . . . . . 
H61 H 0.0167 0.4399 0.3158 0.0411 1.0000 Uiso R . . . . . . 
H81 H 0.3497 0.7094 0.2976 0.0453 1.0000 Uiso R . . . . . . 
H82 H 0.4173 0.5560 0.2898 0.0453 1.0000 Uiso R . . . . . . 
H101 H 0.2158 0.4576 0.2336 0.0489 1.0000 Uiso R . . . . . . 
H111 H -0.0889 0.4529 0.1861 0.0536 1.0000 Uiso R . . . . . . 
H121 H -0.3849 0.6030 0.1866 0.0621 1.0000 Uiso R . . . . . . 
H131 H -0.3759 0.7655 0.2364 0.0585 1.0000 Uiso R . . . . . . 
H141 H -0.0715 0.7685 0.2859 0.0483 1.0000 Uiso R . . . . . . 
H151 H 0.3623 0.5718 0.3919 0.0449 1.0000 Uiso R . . . . . . 
H152 H 0.5547 0.5834 0.3598 0.0441 1.0000 Uiso R . . . . . . 
H171 H 0.1003 0.8157 0.3575 0.0435 1.0000 Uiso R . . . . . . 
H181 H 0.1460 1.0373 0.3738 0.0466 1.0000 Uiso R . . . . . . 
H191 H 0.4943 1.1146 0.4023 0.0452 1.0000 Uiso R . . . . . . 
H201 H 0.8008 0.9742 0.4167 0.0521 1.0000 Uiso R . . . . . . 
H211 H 0.7562 0.7487 0.4002 0.0425 1.0000 Uiso R . . . . . . 
H221 H 0.3899 0.3555 0.3145 0.0661 1.0000 Uiso R . . . . . . 
H223 H 0.4123 0.3445 0.3609 0.0659 1.0000 Uiso R . . . . . . 
H222 H 0.2247 0.2590 0.3352 0.0660 1.0000 Uiso R . . . . . . 
H241 H -0.2704 0.1133 0.5381 0.0761 1.0000 Uiso R . . . . . . 
H242 H -0.0558 0.1121 0.5126 0.0763 1.0000 Uiso R . . . . . . 
H243 H -0.2901 0.0543 0.4944 0.0763 1.0000 Uiso R . . . . . . 
H252 H -0.2540 0.3518 0.5465 0.0743 1.0000 Uiso R . . . . . . 
H251 H -0.0280 0.3582 0.5255 0.0748 1.0000 Uiso R . . . . . . 
H253 H -0.2341 0.4468 0.5113 0.0738 1.0000 Uiso R . . . . . . 
H262 H -0.6215 0.2501 0.5094 0.0729 1.0000 Uiso R . . . . . . 
H261 H -0.5905 0.3491 0.4749 0.0733 1.0000 Uiso R . . . . . . 
H263 H -0.6018 0.1971 0.4660 0.0731 1.0000 Uiso R . . . . . . 
loop_
_atom_site_aniso_label
_atom_site_aniso_U_11
_atom_site_aniso_U_22
_atom_site_aniso_U_33
_atom_site_aniso_U_23
_atom_site_aniso_U_13
_atom_site_aniso_U_12
O1 0.0437(10) 0.0323(10) 0.0388(10) 0.0033(8) 0.0098(8) 0.0032(8) 
C2 0.0365(15) 0.0350(15) 0.0387(15) 0.0023(12) 0.0014(12) -0.0004(12) 
O3 0.0501(12) 0.0395(11) 0.0533(12) 0.0066(9) 0.0116(9) 0.0112(9) 
C4 0.0420(16) 0.0323(15) 0.0415(15) -0.0008(12) 0.0045(12) 0.0036(12) 
C5 0.0349(14) 0.0335(15) 0.0399(15) 0.0010(12) 0.0016(11) -0.0001(11) 
C6 0.0426(15) 0.0323(15) 0.0376(15) -0.0003(11) 0.0050(12) -0.0019(12) 
N7 0.0398(12) 0.0335(12) 0.0336(12) 0.0021(9) 0.0019(9) -0.0012(10) 
C8 0.0407(15) 0.0354(15) 0.0427(16) 0.0022(12) 0.0075(12) -0.0017(12) 
C9 0.0431(15) 0.0359(15) 0.0346(14) 0.0046(12) 0.0073(12) -0.0008(12) 
C10 0.0521(18) 0.0415(16) 0.0400(16) 0.0019(13) 0.0109(13) 0.0032(13) 
C11 0.061(2) 0.0499(18) 0.0387(16) -0.0034(14) 0.0044(14) -0.0052(15) 
C12 0.0490(18) 0.071(2) 0.0399(17) 0.0044(16) -0.0009(13) -0.0029(16) 
C13 0.0467(17) 0.058(2) 0.0468(18) 0.0095(15) 0.0063(14) 0.0089(14) 
C14 0.0501(17) 0.0426(16) 0.0382(15) 0.0015(13) 0.0071(13) 0.0024(14) 
C15 0.0367(15) 0.0369(15) 0.0439(16) 0.0013(12) 0.0004(12) 0.0026(12) 
C16 0.0362(15) 0.0334(14) 0.0370(15) 0.0012(11) 0.0044(11) -0.0014(12) 
C17 0.0401(15) 0.0364(16) 0.0408(15) 0.0001(12) 0.0034(12) -0.0016(12) 
C18 0.0458(16) 0.0374(16) 0.0462(16) 0.0027(13) 0.0053(13) 0.0024(13) 
C19 0.0599(19) 0.0339(15) 0.0435(16) -0.0016(13) 0.0080(14) -0.0077(14) 
C20 0.0486(17) 0.0463(18) 0.0410(16) -0.0030(13) 0.0034(13) -0.0097(14) 
C21 0.0407(16) 0.0437(17) 0.0428(16) -0.0008(13) 0.0035(12) 0.0007(13) 
C22 0.0557(18) 0.0343(16) 0.0525(18) -0.0002(13) 0.0168(14) 0.0019(13) 
C23 0.0438(15) 0.0364(15) 0.0346(15) -0.0009(12) 0.0092(12) 0.0008(12) 
C24 0.0589(19) 0.0432(17) 0.0492(17) 0.0079(14) 0.0127(14) 0.0036(14) 
C25 0.0614(19) 0.0489(18) 0.0424(17) -0.0056(14) 0.0114(14) -0.0066(15) 
C26 0.0431(17) 0.0510(18) 0.0558(19) 0.0029(15) 0.0119(14) -0.0001(14) 

_refine_ls_extinction_method 
    'None'
_oxford_refine_ls_scale 0.5090(15) 
loop_
 _geom_bond_atom_site_label_1
 _geom_bond_site_symmetry_1
 _geom_bond_atom_site_label_2
 _geom_bond_site_symmetry_2
 _geom_bond_distance
 _geom_bond_publ_flag
O1 . C2 . 1.341(3)    yes
O1 . C23 . 1.486(3)    yes
C2 . O3 . 1.213(3)    yes
C2 . C4 . 1.485(4)    yes
C4 . C5 . 1.326(4)    yes
C4 . H41 . 0.955    no
C5 . C6 . 1.500(4)    yes
C5 . H51 . 0.965    no
C6 . N7 . 1.481(3)    yes
C6 . C22 . 1.526(4)    yes
C6 . H61 . 1.003    no
N7 . C8 . 1.468(3)    yes
N7 . C15 . 1.461(3)    yes
C8 . C9 . 1.509(4)    yes
C8 . H81 . 0.992    no
C8 . H82 . 0.975    no
C9 . C10 . 1.388(4)    yes
C9 . C14 . 1.391(4)    yes
C10 . C11 . 1.384(4)    yes
C10 . H101 . 0.957    no
C11 . C12 . 1.373(4)    yes
C11 . H111 . 0.936    no
C12 . C13 . 1.386(4)    yes
C12 . H121 . 0.948    no
C13 . C14 . 1.383(4)    yes
C13 . H131 . 0.959    no
C14 . H141 . 0.963    no
C15 . C16 . 1.519(4)    yes
C15 . H151 . 0.995    no
C15 . H152 . 0.991    no
C16 . C17 . 1.388(4)    yes
C16 . C21 . 1.391(4)    yes
C17 . C18 . 1.390(4)    yes
C17 . H171 . 0.967    no
C18 . C19 . 1.380(4)    yes
C18 . H181 . 0.947    no
C19 . C20 . 1.376(4)    yes
C19 . H191 . 0.927    no
C20 . C21 . 1.388(4)    yes
C20 . H201 . 0.963    no
C21 . H211 . 0.950    no
C22 . H221 . 0.964    no
C22 . H223 . 0.963    no
C22 . H222 . 0.969    no
C23 . C24 . 1.513(4)    yes
C23 . C25 . 1.513(4)    yes
C23 . C26 . 1.512(4)    yes
C24 . H241 . 0.980    no
C24 . H242 . 0.968    no
C24 . H243 . 0.960    no
C25 . H252 . 0.945    no
C25 . H251 . 0.958    no
C25 . H253 . 0.948    no
C26 . H262 . 0.970    no
C26 . H261 . 0.964    no
C26 . H263 . 0.986    no
loop_
 _geom_angle_atom_site_label_1
 _geom_angle_site_symmetry_1
 _geom_angle_atom_site_label_2
 _geom_angle_site_symmetry_2
 _geom_angle_atom_site_label_3
 _geom_angle_site_symmetry_3
 _geom_angle
 _geom_angle_publ_flag
C2 . O1 . C23 . 120.81(19)    yes
O1 . C2 . O3 . 125.2(2)    yes
O1 . C2 . C4 . 110.9(2)    yes
O3 . C2 . C4 . 124.0(2)    yes
C2 . C4 . C5 . 120.0(2)    yes
C2 . C4 . H41 . 120.8    no
C5 . C4 . H41 . 119.2    no
C4 . C5 . C6 . 129.1(2)    yes
C4 . C5 . H51 . 114.0    no
C6 . C5 . H51 . 116.9    no
C5 . C6 . N7 . 107.4(2)    yes
C5 . C6 . C22 . 114.0(2)    yes
N7 . C6 . C22 . 115.5(2)    yes
C5 . C6 . H61 . 107.2    no
N7 . C6 . H61 . 105.8    no
C22 . C6 . H61 . 106.4    no
C6 . N7 . C8 . 113.2(2)    yes
C6 . N7 . C15 . 112.2(2)    yes
C8 . N7 . C15 . 110.5(2)    yes
N7 . C8 . C9 . 112.5(2)    yes
N7 . C8 . H81 . 106.9    no
C9 . C8 . H81 . 104.1    no
N7 . C8 . H82 . 111.8    no
C9 . C8 . H82 . 108.6    no
H81 . C8 . H82 . 112.7    no
C8 . C9 . C10 . 121.4(2)    yes
C8 . C9 . C14 . 120.6(2)    yes
C10 . C9 . C14 . 118.0(2)    yes
C9 . C10 . C11 . 121.3(3)    yes
C9 . C10 . H101 . 120.6    no
C11 . C10 . H101 . 118.2    no
C10 . C11 . C12 . 120.0(3)    yes
C10 . C11 . H111 . 119.9    no
C12 . C11 . H111 . 120.1    no
C11 . C12 . C13 . 119.8(3)    yes
C11 . C12 . H121 . 119.3    no
C13 . C12 . H121 . 120.9    no
C12 . C13 . C14 . 120.0(3)    yes
C12 . C13 . H131 . 120.5    no
C14 . C13 . H131 . 119.5    no
C9 . C14 . C13 . 120.9(3)    yes
C9 . C14 . H141 . 118.4    no
C13 . C14 . H141 . 120.6    no
N7 . C15 . C16 . 113.3(2)    yes
N7 . C15 . H151 . 107.9    no
C16 . C15 . H151 . 106.0    no
N7 . C15 . H152 . 111.8    no
C16 . C15 . H152 . 107.8    no
H151 . C15 . H152 . 109.9    no
C15 . C16 . C17 . 122.1(2)    yes
C15 . C16 . C21 . 119.6(2)    yes
C17 . C16 . C21 . 118.3(2)    yes
C16 . C17 . C18 . 120.5(3)    yes
C16 . C17 . H171 . 119.1    no
C18 . C17 . H171 . 120.4    no
C17 . C18 . C19 . 120.5(3)    yes
C17 . C18 . H181 . 118.6    no
C19 . C18 . H181 . 120.9    no
C18 . C19 . C20 . 119.6(3)    yes
C18 . C19 . H191 . 119.2    no
C20 . C19 . H191 . 121.1    no
C19 . C20 . C21 . 120.0(3)    yes
C19 . C20 . H201 . 118.2    no
C21 . C20 . H201 . 121.8    no
C16 . C21 . C20 . 121.1(3)    yes
C16 . C21 . H211 . 118.7    no
C20 . C21 . H211 . 120.1    no
C6 . C22 . H221 . 108.3    no
C6 . C22 . H223 . 109.9    no
H221 . C22 . H223 . 109.0    no
C6 . C22 . H222 . 108.3    no
H221 . C22 . H222 . 109.5    no
H223 . C22 . H222 . 111.8    no
O1 . C23 . C24 . 102.5(2)    yes
O1 . C23 . C25 . 109.5(2)    yes
C24 . C23 . C25 . 110.4(2)    yes
O1 . C23 . C26 . 110.4(2)    yes
C24 . C23 . C26 . 110.4(2)    yes
C25 . C23 . C26 . 113.1(2)    yes
C23 . C24 . H241 . 110.4    no
C23 . C24 . H242 . 109.6    no
H241 . C24 . H242 . 107.7    no
C23 . C24 . H243 . 109.9    no
H241 . C24 . H243 . 110.2    no
H242 . C24 . H243 . 109.0    no
C23 . C25 . H252 . 108.1    no
C23 . C25 . H251 . 111.1    no
H252 . C25 . H251 . 108.7    no
C23 . C25 . H253 . 110.6    no
H252 . C25 . H253 . 109.5    no
H251 . C25 . H253 . 108.8    no
C23 . C26 . H262 . 109.7    no
C23 . C26 . H261 . 111.6    no
H262 . C26 . H261 . 108.1    no
C23 . C26 . H263 . 111.8    no
H262 . C26 . H263 . 107.6    no
H261 . C26 . H263 . 108.0    no

#==============================================================================
data_34 
_ccdc_journal_depnumber            '852572'
#==============================================================================

_cell_length_a                    9.9186(3)
_cell_length_b                    13.6626(5)
_cell_length_c                    15.7674(5)
_cell_angle_alpha                 109.510(3)
_cell_angle_beta                  92.589(3)
_cell_angle_gamma                 104.121(3)
_cell_volume                      1934.30(13)
 
_symmetry_cell_setting            'Triclinic' 
_symmetry_space_group_name_H-M    'P -1 ' 
_symmetry_space_group_name_Hall   '-P 1' 
loop_
 _symmetry_equiv_pos_as_xyz
 'x,y,z'
 '-x,-y,-z'

loop_
_atom_type_symbol
_atom_type_scat_dispersion_real
_atom_type_scat_dispersion_imag
_atom_type_scat_Cromer_Mann_a1
_atom_type_scat_Cromer_Mann_b1
_atom_type_scat_Cromer_Mann_a2
_atom_type_scat_Cromer_Mann_b2
_atom_type_scat_Cromer_Mann_a3
_atom_type_scat_Cromer_Mann_b3
_atom_type_scat_Cromer_Mann_a4
_atom_type_scat_Cromer_Mann_b4
_atom_type_scat_Cromer_Mann_c
_atom_type_scat_source  
 C       0.0181   0.0091   2.3100  20.8439   1.0200  10.2075   1.5886   0.5687
   0.8650  51.6512   0.2156 'International Tables Vol C 4.2.6.8 and 6.1.1.4'
 H       0.0000   0.0000   0.4930  10.5109   0.3229  26.1257   0.1402   3.1424
   0.0408  57.7998   0.0030 'International Tables Vol C 4.2.6.8 and 6.1.1.4'
 Cl      0.3639   0.7018  11.4604   0.0104   7.1964   1.1662   6.2556  18.5194
   1.6455  47.7784  -9.5574 'International Tables Vol C 4.2.6.8 and 6.1.1.4'
 N       0.0311   0.0180  12.2126   0.0057   3.1322   9.8933   2.0125  28.9975
   1.1663   0.5826 -11.5290 'International Tables Vol C 4.2.6.8 and 6.1.1.4'
 O       0.0492   0.0322   3.0485  13.2771   2.2868   5.7011   1.5463   0.3239
   0.8670  32.9089   0.2508 'International Tables Vol C 4.2.6.8 and 6.1.1.4'
 
_cell_formula_units_Z                    3

# Given Formula = C28 H38 Cl0.67 N1.33 O2 
# Dc =      1.16 Fooo =    728.00 Mu =     11.70 M =    673.38
# Found Formula = C28 H38 Cl0.67 N1.33 O2 
# Dc =      1.16 FOOO =    728.00 Mu =     11.70 M =    673.38

_chemical_formula_sum             'C28 H38 Cl0.67 N1.33 O2'
_chemical_formula_moiety          'C28 H38 Cl0.67 N1.33 O2'
_chemical_compound_source                .
_chemical_formula_weight            448.92
 
_cell_measurement_reflns_used            0
_cell_measurement_theta_min              0
_cell_measurement_theta_max              0
_cell_measurement_temperature          150
 
_exptl_crystal_description        'plate' 
_exptl_crystal_colour             'colourless' 
_exptl_crystal_size_min           0.04 
_exptl_crystal_size_mid           0.10 
_exptl_crystal_size_max           0.20 
 
_exptl_crystal_density_diffrn     1.156 
_exptl_crystal_density_meas       . 
_exptl_crystal_density_method     'not measured' 
# Non-dispersive F(000): 
_exptl_crystal_F_000              728 
_exptl_absorpt_coefficient_mu     1.170 
 
# Sheldrick geometric approximatio 1.00 1.00 
_exptl_absorpt_correction_type    none 
_exptl_absorpt_correction_T_min   1.0000 
_exptl_absorpt_correction_T_max   1.0000 
_diffrn_measurement_device_type   'Unknown' 
_diffrn_measurement_device        'Serial' 
_diffrn_radiation_monochromator   'graphite' 
_diffrn_radiation_type            'Cu K\a'
_diffrn_radiation_wavelength           1.54180
_diffrn_measurement_method        \w/2\q 
 
# If a reference occurs more than once, delete the author 
# and date from subsequent references. 
_computing_data_collection        'USER DEFINED DATA COLLECTION' 
_computing_cell_refinement        'USER DEFINED CELL REFINEMENT' 
_computing_data_reduction         'USER DEFINED DATA REDUCTION' 
_computing_structure_solution     'SIR92 (Altomare et al., 1994)' 
_computing_structure_refinement   'CRYSTALS (Betteridge et al., 2003)' 
_computing_publication_material   'CRYSTALS (Betteridge et al., 2003)' 
_computing_molecular_graphics     'CAMERON (Watkin et al., 1996)' 
 
_diffrn_standards_interval_time   . 
_diffrn_standards_interval_count  . 
_diffrn_standards_number          0 
_diffrn_standards_decay_%         . 
 
_diffrn_ambient_temperature        150
_diffrn_reflns_number             58667 
_reflns_number_total              8081 
_diffrn_reflns_av_R_equivalents   0.047 
# Number of reflections without Friedels Law is 0 
# Number of reflections with Friedels Law is 8081 
# Theoretical number of reflections is about 16298 
 
 
_diffrn_reflns_theta_min          3.002 
_diffrn_reflns_theta_max          76.689 
_diffrn_measured_fraction_theta_max 0.990 
 
_diffrn_reflns_theta_full         75.155 
_diffrn_measured_fraction_theta_full 0.996 
 
_diffrn_reflns_limit_h_min        -12 
_diffrn_reflns_limit_h_max        12 
_diffrn_reflns_limit_k_min        -17 
_diffrn_reflns_limit_k_max        17 
_diffrn_reflns_limit_l_min        -19 
_diffrn_reflns_limit_l_max        19 
_reflns_limit_h_min               -12 
_reflns_limit_h_max               12 
_reflns_limit_k_min               -17 
_reflns_limit_k_max               16 
_reflns_limit_l_min               0 
_reflns_limit_l_max               19 
 
_oxford_diffrn_Wilson_B_factor    2.91 
_oxford_diffrn_Wilson_scale       0.04 
 
_atom_sites_solution_primary      direct #heavy,direct,difmap,geom
# _atom_sites_solution_secondary  difmap
_atom_sites_solution_hydrogens    geom
 
_refine_diff_density_min          -0.88 
_refine_diff_density_max          0.93 
 
# The current dictionary definitions do not cover the 
# situation where the reflections used for refinement were 
# selected by a user-defined sigma threshold 
 
# The values actually used during refinement 
_oxford_reflns_threshold_expression_ref     I>-3.0\s(I)
_refine_ls_number_reflns          8081 
_refine_ls_number_restraints      0 
_refine_ls_number_parameters      433 
_oxford_refine_ls_R_factor_ref    0.0653 
_refine_ls_wR_factor_ref          0.1774 
_refine_ls_goodness_of_fit_ref    1.0270 
_refine_ls_shift/su_max           0.0005328 
_refine_ls_shift/su_mean          0.0000306 
 
# The values computed from all data 
_oxford_reflns_number_all         8081 
_refine_ls_R_factor_all           0.0653 
_refine_ls_wR_factor_all          0.1774 
 
# The values computed with a 2 sigma cutoff - a la SHELX 
_reflns_threshold_expression      I>2.0\s(I)
_reflns_number_gt                 7394 
_refine_ls_R_factor_gt            0.0620 
_refine_ls_wR_factor_gt           0.1756 
 
# choose from: rm (reference molecule of known chirality), 
# ad (anomolous dispersion - Flack), rmad (rm and ad), 
# syn (from synthesis), unk (unknown) or . (not applicable). 
_chemical_absolute_configuration  '.' 
 
_refine_ls_structure_factor_coef  Fsqd 
_refine_ls_matrix_type            full
_refine_ls_hydrogen_treatment     none           # none, undef, noref, refall,
                                                 # refxyz, refU, constr or mixed
_refine_ls_weighting_scheme       calc 
_refine_ls_weighting_details 
;
 Method= Modified Sheldrick 
 w=1/[\s^2^(F^2^) + ( 0.06P)^2^ + 3.63P] 
 ,where P=(max(Fo^2^,0) + 2Fc^2^)/3 
;
# Insert your own references if required - in alphabetical order 
_publ_section_references 
; 
User-defined data collection reference 
 
User defined data reduction 
 
User defined cell refinement 
 
Altomare, A., Cascarano, G., Giacovazzo, C., Guagliardi, A., Burla, M.C., 
Polidori, G. & Camalli, M. (1994). J. Appl. Cryst. 27, 435. 
 
Betteridge, P.W., Carruthers, J.R., Cooper, R.I., 
Prout, K. & Watkin, D.J. (2003). J. Appl. Cryst. 36, 1487. 
 
Watkin, D.J., Prout, C.K. & Pearce, L.J. (1996). CAMERON, Chemical 
Crystallography Laboratory, Oxford, UK. 
; 

# Uequiv = arithmetic mean of Ui i.e. Ueqiv = (U1+U2+U3)/3

# Replace last . with number of unfound hydrogen atomsattached to an atom.

# ..._refinement_flags_... 
# . no refinement constraints           S special position constraint on site
# G rigid group refinement of site      R riding atom
# D distance or angle restraint on site T thermal displacement constraints
# U Uiso or Uij restraint (rigid bond)  P partial occupancy constraint

loop_
_atom_site_label
_atom_site_type_symbol
_atom_site_fract_x
_atom_site_fract_y
_atom_site_fract_z
_atom_site_U_iso_or_equiv
_atom_site_occupancy
_atom_site_adp_type
_atom_site_refinement_flags_posn
_atom_site_refinement_flags_adp
_atom_site_refinement_flags_occupancy
_atom_site_disorder_assembly
_atom_site_disorder_group
_oxford_atom_site_special_shape
_atom_site_attached_hydrogens
Cl1 Cl 0.76528(6) 1.05952(5) 0.89470(4) 0.0325 1.0000 Uani . . . . . . . 
O2 O 1.1435(2) 0.73198(16) 0.66560(14) 0.0431 1.0000 Uani . . . . . . . 
C3 C 1.0783(3) 0.7332(2) 0.72810(17) 0.0304 1.0000 Uani . . . . . . . 
O4 O 1.0320(2) 0.65062(14) 0.75575(13) 0.0374 1.0000 Uani . . . . . . . 
C5 C 1.0695(4) 0.5475(2) 0.7146(2) 0.0468 1.0000 Uani . . . . . . . 
C6 C 1.0019(5) 0.4820(3) 0.7701(3) 0.0681 1.0000 Uani . . . . . . . 
C7 C 1.2279(5) 0.5697(4) 0.7304(4) 0.0773 1.0000 Uani . . . . . . . 
C8 C 1.0073(6) 0.4951(3) 0.6160(3) 0.0811 1.0000 Uani . . . . . . . 
C9 C 1.0373(3) 0.83075(18) 0.78836(16) 0.0262 1.0000 Uani . . . . . . . 
C10 C 1.1032(2) 0.93220(18) 0.76666(15) 0.0228 1.0000 Uani . . . . . . . 
N11 N 1.1943(2) 1.02438(16) 0.84835(13) 0.0238 1.0000 Uani . . . . . . . 
C12 C 1.1278(3) 1.04434(19) 0.93553(16) 0.0266 1.0000 Uani . . . . . . . 
C13 C 1.1794(3) 1.1608(2) 0.99822(16) 0.0278 1.0000 Uani . . . . . . . 
C14 C 1.2846(3) 1.1936(2) 1.07124(19) 0.0387 1.0000 Uani . . . . . . . 
C15 C 1.3284(3) 1.3013(3) 1.1289(2) 0.0464 1.0000 Uani . . . . . . . 
C16 C 1.2659(3) 1.3752(2) 1.1149(2) 0.0467 1.0000 Uani . . . . . . . 
C17 C 1.1606(4) 1.3429(2) 1.0431(2) 0.0484 1.0000 Uani . . . . . . . 
C18 C 1.1168(3) 1.2363(2) 0.9856(2) 0.0393 1.0000 Uani . . . . . . . 
C19 C 1.3479(2) 1.0244(2) 0.86292(17) 0.0293 1.0000 Uani . . . . . . . 
C20 C 1.4220(3) 1.0379(3) 0.7839(2) 0.0377 1.0000 Uani . . . . . . . 
C21 C 1.3646(3) 0.9260(2) 0.8815(2) 0.0373 1.0000 Uani . . . . . . . 
C22 C 0.9954(2) 0.97667(18) 0.72659(15) 0.0222 1.0000 Uani . . . . . . . 
N23 N 1.0723(2) 1.08498(15) 0.72602(13) 0.0232 1.0000 Uani . . . . . . . 
C24 C 1.1544(2) 1.08135(19) 0.65039(16) 0.0249 1.0000 Uani . . . . . . . 
C25 C 1.2667(2) 1.18614(19) 0.66598(17) 0.0260 1.0000 Uani . . . . . . . 
C26 C 1.3197(3) 1.2647(2) 0.75147(18) 0.0337 1.0000 Uani . . . . . . . 
C27 C 1.4262(3) 1.3572(2) 0.7607(2) 0.0418 1.0000 Uani . . . . . . . 
C28 C 1.4803(3) 1.3718(2) 0.6854(2) 0.0430 1.0000 Uani . . . . . . . 
C29 C 1.4276(3) 1.2946(3) 0.6002(2) 0.0411 1.0000 Uani . . . . . . . 
C30 C 1.3216(3) 1.2023(2) 0.59064(18) 0.0331 1.0000 Uani . . . . . . . 
C31 C 0.9855(3) 1.16223(19) 0.74059(17) 0.0267 1.0000 Uani . . . . . . . 
C32 C 0.8789(3) 1.14943(19) 0.66318(16) 0.0264 1.0000 Uani . . . . . . . 
C33 C 0.7367(3) 1.1053(2) 0.6639(2) 0.0366 1.0000 Uani . . . . . . . 
C34 C 0.6355(3) 1.0997(3) 0.5977(2) 0.0480 1.0000 Uani . . . . . . . 
C35 C 0.6744(3) 1.1387(3) 0.5295(2) 0.0430 1.0000 Uani . . . . . . . 
C36 C 0.8142(3) 1.1835(2) 0.52763(19) 0.0368 1.0000 Uani . . . . . . . 
C37 C 0.9153(3) 1.1886(2) 0.59392(18) 0.0303 1.0000 Uani . . . . . . . 
C38 C 0.9204(3) 0.89623(19) 0.63238(16) 0.0276 1.0000 Uani . . . . . . . 
C39 C 0.7976(3) 0.8034(2) 0.63040(17) 0.0295 1.0000 Uani . . . . . . . 
C40 C 0.7976(3) 0.6971(2) 0.58443(19) 0.0374 1.0000 Uani . . . . . . . 
C41 C 0.6812(4) 0.6121(2) 0.5783(2) 0.0462 1.0000 Uani . . . . . . . 
C42 C 0.5649(3) 0.6323(2) 0.6167(2) 0.0468 1.0000 Uani . . . . . . . 
C43 C 0.5640(3) 0.7374(3) 0.6627(2) 0.0452 1.0000 Uani . . . . . . . 
C44 C 0.6801(3) 0.8229(2) 0.6703(2) 0.0380 1.0000 Uani . . . . . . . 
O45 O 0.7001(9) 1.2703(5) 1.0149(4) 0.2244 1.0000 Uani . . . . . . . 
C46 C 0.6774(6) 1.3246(3) 0.9660(3) 0.0777 1.0000 Uani . . . . . . . 
C47 C 0.6313(6) 1.4201(4) 1.0200(4) 0.0896 1.0000 Uani . . . . . . . 
C48 C 0.7804(6) 1.3465(4) 0.9077(4) 0.1010 1.0000 Uani . . . . . . . 
H61 H 1.0235 0.4129 0.7505 0.1014 1.0000 Uiso R . . . . . . 
H63 H 1.0359 0.5179 0.8339 0.1019 1.0000 Uiso R . . . . . . 
H62 H 0.9001 0.4689 0.7601 0.1019 1.0000 Uiso R . . . . . . 
H71 H 1.2516 0.5016 0.7189 0.1155 1.0000 Uiso R . . . . . . 
H73 H 1.2629 0.6172 0.7932 0.1167 1.0000 Uiso R . . . . . . 
H72 H 1.2694 0.6038 0.6893 0.1162 1.0000 Uiso R . . . . . . 
H81 H 1.0256 0.4258 0.5921 0.1210 1.0000 Uiso R . . . . . . 
H82 H 1.0484 0.5393 0.5813 0.1209 1.0000 Uiso R . . . . . . 
H83 H 0.9049 0.4839 0.6102 0.1210 1.0000 Uiso R . . . . . . 
H91 H 1.0658 0.8415 0.8513 0.0309 1.0000 Uiso R . . . . . . 
H92 H 0.9353 0.8159 0.7776 0.0310 1.0000 Uiso R . . . . . . 
H101 H 1.1631 0.9122 0.7200 0.0266 1.0000 Uiso R . . . . . . 
H122 H 1.1482 0.9962 0.9649 0.0315 1.0000 Uiso R . . . . . . 
H121 H 1.0277 1.0255 0.9170 0.0309 1.0000 Uiso R . . . . . . 
H141 H 1.3254 1.1428 1.0816 0.0466 1.0000 Uiso R . . . . . . 
H151 H 1.3983 1.3231 1.1772 0.0554 1.0000 Uiso R . . . . . . 
H161 H 1.2925 1.4479 1.1544 0.0562 1.0000 Uiso R . . . . . . 
H171 H 1.1193 1.3938 1.0321 0.0581 1.0000 Uiso R . . . . . . 
H181 H 1.0428 1.2144 0.9376 0.0472 1.0000 Uiso R . . . . . . 
H191 H 1.3905 1.0878 0.9175 0.0344 1.0000 Uiso R . . . . . . 
H201 H 1.5204 1.0511 0.7989 0.0560 1.0000 Uiso R . . . . . . 
H203 H 1.4068 1.0981 0.7684 0.0555 1.0000 Uiso R . . . . . . 
H202 H 1.3904 0.9730 0.7297 0.0547 1.0000 Uiso R . . . . . . 
H211 H 1.4618 0.9347 0.8954 0.0550 1.0000 Uiso R . . . . . . 
H212 H 1.3207 0.9198 0.9331 0.0545 1.0000 Uiso R . . . . . . 
H213 H 1.3296 0.8611 0.8298 0.0545 1.0000 Uiso R . . . . . . 
H221 H 0.9248 0.9867 0.7676 0.0258 1.0000 Uiso R . . . . . . 
H241 H 1.1991 1.0236 0.6420 0.0298 1.0000 Uiso R . . . . . . 
H242 H 1.0919 1.0650 0.5955 0.0302 1.0000 Uiso R . . . . . . 
H261 H 1.2840 1.2555 0.8025 0.0400 1.0000 Uiso R . . . . . . 
H271 H 1.4600 1.4092 0.8189 0.0505 1.0000 Uiso R . . . . . . 
H281 H 1.5526 1.4350 0.6922 0.0510 1.0000 Uiso R . . . . . . 
H291 H 1.4626 1.3034 0.5483 0.0489 1.0000 Uiso R . . . . . . 
H301 H 1.2846 1.1494 0.5323 0.0390 1.0000 Uiso R . . . . . . 
H311 H 1.0507 1.2325 0.7560 0.0319 1.0000 Uiso R . . . . . . 
H312 H 0.9388 1.1619 0.7927 0.0320 1.0000 Uiso R . . . . . . 
H331 H 0.7102 1.0807 0.7122 0.0438 1.0000 Uiso R . . . . . . 
H341 H 0.5418 1.0690 0.5997 0.0570 1.0000 Uiso R . . . . . . 
H351 H 0.6064 1.1352 0.4850 0.0515 1.0000 Uiso R . . . . . . 
H361 H 0.8406 1.2098 0.4812 0.0441 1.0000 Uiso R . . . . . . 
H371 H 1.0100 1.2190 0.5918 0.0361 1.0000 Uiso R . . . . . . 
H381 H 0.8833 0.9364 0.6004 0.0326 1.0000 Uiso R . . . . . . 
H382 H 0.9887 0.8653 0.5980 0.0329 1.0000 Uiso R . . . . . . 
H401 H 0.8734 0.6822 0.5564 0.0446 1.0000 Uiso R . . . . . . 
H411 H 0.6823 0.5404 0.5473 0.0551 1.0000 Uiso R . . . . . . 
H421 H 0.4885 0.5757 0.6118 0.0562 1.0000 Uiso R . . . . . . 
H431 H 0.4845 0.7504 0.6885 0.0533 1.0000 Uiso R . . . . . . 
H441 H 0.6795 0.8936 0.7020 0.0446 1.0000 Uiso R . . . . . . 
H461 H 0.5948 1.2696 0.9262 0.0940 1.0000 Uiso R . . . . . . 
H471 H 0.5872 1.4464 0.9797 0.1350 1.0000 Uiso R . . . . . . 
H473 H 0.7138 1.4769 1.0563 0.1355 1.0000 Uiso R . . . . . . 
H472 H 0.5687 1.4006 1.0603 0.1353 1.0000 Uiso R . . . . . . 
H111 H 1.1967 1.0830 0.8343 0.0348 1.0000 Uiso R . . . . . . 
H451 H 0.7288 1.2097 0.9791 0.1962 1.0000 Uiso R . . . . . . 
H481 H 0.8042 1.2821 0.8754 0.2077 1.0000 Uiso R . . . . . . 
H482 H 0.8621 1.3995 0.9440 0.2077 1.0000 Uiso R . . . . . . 
H483 H 0.7429 1.3726 0.8657 0.2077 1.0000 Uiso R . . . . . . 
loop_
_atom_site_aniso_label
_atom_site_aniso_U_11
_atom_site_aniso_U_22
_atom_site_aniso_U_33
_atom_site_aniso_U_23
_atom_site_aniso_U_13
_atom_site_aniso_U_12
Cl1 0.0287(3) 0.0384(3) 0.0342(3) 0.0168(3) 0.0057(2) 0.0104(2) 
O2 0.0669(14) 0.0327(10) 0.0405(11) 0.0181(9) 0.0255(10) 0.0227(10) 
C3 0.0366(14) 0.0256(12) 0.0312(13) 0.0119(10) 0.0062(10) 0.0097(10) 
O4 0.0504(12) 0.0249(9) 0.0419(11) 0.0151(8) 0.0172(9) 0.0129(8) 
C5 0.069(2) 0.0313(14) 0.0525(18) 0.0204(13) 0.0251(16) 0.0247(14) 
C6 0.108(3) 0.0376(17) 0.076(3) 0.0323(18) 0.044(2) 0.029(2) 
C7 0.075(3) 0.070(3) 0.121(4) 0.056(3) 0.037(3) 0.045(2) 
C8 0.149(5) 0.0347(18) 0.053(2) 0.0057(16) 0.012(3) 0.027(2) 
C9 0.0285(12) 0.0236(11) 0.0280(12) 0.0111(9) 0.0059(9) 0.0065(9) 
C10 0.0220(11) 0.0225(11) 0.0238(11) 0.0084(9) 0.0035(9) 0.0054(9) 
N11 0.0210(9) 0.0254(9) 0.0261(10) 0.0110(8) 0.0016(8) 0.0057(8) 
C12 0.0243(11) 0.0297(12) 0.0263(12) 0.0107(10) 0.0035(9) 0.0073(9) 
C13 0.0258(12) 0.0299(12) 0.0256(11) 0.0082(10) 0.0040(9) 0.0059(10) 
C14 0.0378(15) 0.0394(15) 0.0367(14) 0.0134(12) -0.0054(12) 0.0088(12) 
C15 0.0423(16) 0.0459(17) 0.0360(15) 0.0066(13) -0.0110(13) -0.0003(13) 
C16 0.0485(18) 0.0318(14) 0.0451(17) 0.0010(12) -0.0001(14) 0.0039(13) 
C17 0.0522(19) 0.0327(15) 0.0530(18) 0.0047(13) -0.0050(15) 0.0160(13) 
C18 0.0391(15) 0.0348(14) 0.0374(15) 0.0044(12) -0.0066(12) 0.0124(12) 
C19 0.0205(11) 0.0384(13) 0.0308(12) 0.0144(11) 0.0024(9) 0.0084(10) 
C20 0.0232(12) 0.0564(17) 0.0417(15) 0.0267(13) 0.0076(11) 0.0121(12) 
C21 0.0293(13) 0.0488(16) 0.0463(16) 0.0262(13) 0.0086(12) 0.0193(12) 
C22 0.0222(11) 0.0220(10) 0.0235(11) 0.0091(9) 0.0054(9) 0.0065(9) 
N23 0.0229(9) 0.0213(9) 0.0262(10) 0.0090(8) 0.0038(8) 0.0064(7) 
C24 0.0234(11) 0.0249(11) 0.0254(11) 0.0098(9) 0.0027(9) 0.0042(9) 
C25 0.0220(11) 0.0270(11) 0.0310(12) 0.0139(10) 0.0009(9) 0.0056(9) 
C26 0.0324(13) 0.0323(13) 0.0328(13) 0.0119(11) 0.0019(11) 0.0023(11) 
C27 0.0374(15) 0.0323(14) 0.0462(16) 0.0103(12) -0.0028(12) -0.0010(12) 
C28 0.0325(14) 0.0369(15) 0.0575(18) 0.0238(14) -0.0012(13) -0.0026(12) 
C29 0.0324(14) 0.0516(17) 0.0467(16) 0.0309(14) 0.0077(12) 0.0055(12) 
C30 0.0285(13) 0.0399(14) 0.0318(13) 0.0163(11) 0.0021(10) 0.0060(11) 
C31 0.0276(12) 0.0244(11) 0.0288(12) 0.0092(9) 0.0040(9) 0.0087(9) 
C32 0.0278(12) 0.0256(11) 0.0282(12) 0.0098(9) 0.0053(9) 0.0109(9) 
C33 0.0282(13) 0.0456(15) 0.0430(15) 0.0241(13) 0.0082(11) 0.0106(11) 
C34 0.0243(13) 0.064(2) 0.060(2) 0.0294(17) 0.0018(13) 0.0087(13) 
C35 0.0365(15) 0.0560(18) 0.0395(15) 0.0168(14) -0.0046(12) 0.0200(13) 
C36 0.0437(15) 0.0440(15) 0.0321(13) 0.0180(12) 0.0094(12) 0.0219(13) 
C37 0.0303(13) 0.0319(13) 0.0339(13) 0.0151(10) 0.0077(10) 0.0129(10) 
C38 0.0265(12) 0.0274(12) 0.0250(11) 0.0066(9) 0.0007(9) 0.0049(9) 
C39 0.0297(12) 0.0263(12) 0.0265(12) 0.0071(9) -0.0036(10) 0.0017(10) 
C40 0.0377(15) 0.0290(13) 0.0371(14) 0.0057(11) -0.0035(11) 0.0041(11) 
C41 0.0578(19) 0.0262(13) 0.0419(16) 0.0073(12) -0.0100(14) -0.0013(13) 
C42 0.0443(17) 0.0390(16) 0.0439(16) 0.0164(13) -0.0070(13) -0.0120(13) 
C43 0.0354(15) 0.0455(17) 0.0449(16) 0.0142(13) 0.0051(13) -0.0033(13) 
C44 0.0333(14) 0.0326(13) 0.0399(15) 0.0081(11) 0.0044(11) 0.0014(11) 
O45 0.506(12) 0.186(5) 0.153(4) 0.133(4) 0.212(6) 0.268(7) 
C46 0.109(4) 0.057(2) 0.095(3) 0.042(2) 0.057(3) 0.044(2) 
C47 0.118(4) 0.086(3) 0.108(4) 0.056(3) 0.067(3) 0.067(3) 
C48 0.133(5) 0.076(3) 0.143(5) 0.063(3) 0.092(4) 0.070(3) 

_refine_ls_extinction_method 
    'None'
_oxford_refine_ls_scale 6.57(17) 
loop_
 _geom_bond_atom_site_label_1
 _geom_bond_site_symmetry_1
 _geom_bond_atom_site_label_2
 _geom_bond_site_symmetry_2
 _geom_bond_distance
 _geom_bond_publ_flag
O2 . C3 . 1.201(3)    yes
C3 . O4 . 1.329(3)    yes
C3 . C9 . 1.516(3)    yes
O4 . C5 . 1.487(3)    yes
C5 . C6 . 1.516(4)    yes
C5 . C7 . 1.517(5)    yes
C5 . C8 . 1.505(5)    yes
C6 . H61 . 0.971    no
C6 . H63 . 0.963    no
C6 . H62 . 0.977    no
C7 . H71 . 0.976    no
C7 . H73 . 0.976    no
C7 . H72 . 0.968    no
C8 . H81 . 0.961    no
C8 . H82 . 0.976    no
C8 . H83 . 0.985    no
C9 . C10 . 1.536(3)    yes
C9 . H91 . 0.971    no
C9 . H92 . 0.977    no
C10 . N11 . 1.523(3)    yes
C10 . C22 . 1.556(3)    yes
C10 . H101 . 0.977    no
N11 . C12 . 1.523(3)    yes
N11 . C19 . 1.530(3)    yes
N11 . H111 . 0.895    no
C12 . C13 . 1.509(3)    yes
C12 . H122 . 0.973    no
C12 . H121 . 0.967    no
C13 . C14 . 1.391(4)    yes
C13 . C18 . 1.388(4)    yes
C14 . C15 . 1.393(4)    yes
C14 . H141 . 0.938    no
C15 . C16 . 1.376(5)    yes
C15 . H151 . 0.922    no
C16 . C17 . 1.378(5)    yes
C16 . H161 . 0.942    no
C17 . C18 . 1.380(4)    yes
C17 . H171 . 0.947    no
C18 . H181 . 0.945    no
C19 . C20 . 1.515(4)    yes
C19 . C21 . 1.514(4)    yes
C19 . H191 . 0.979    no
C20 . H201 . 0.951    no
C20 . H203 . 0.975    no
C20 . H202 . 0.975    no
C21 . H211 . 0.948    no
C21 . H212 . 0.958    no
C21 . H213 . 0.956    no
C22 . N23 . 1.493(3)    yes
C22 . C38 . 1.542(3)    yes
C22 . H221 . 0.977    no
N23 . C24 . 1.468(3)    yes
N23 . C31 . 1.486(3)    yes
C24 . C25 . 1.521(3)    yes
C24 . H241 . 0.971    no
C24 . H242 . 0.968    no
C25 . C26 . 1.393(4)    yes
C25 . C30 . 1.390(4)    yes
C26 . C27 . 1.395(4)    yes
C26 . H261 . 0.928    no
C27 . C28 . 1.379(4)    yes
C27 . H271 . 0.938    no
C28 . C29 . 1.383(4)    yes
C28 . H281 . 0.949    no
C29 . C30 . 1.389(4)    yes
C29 . H291 . 0.935    no
C30 . H301 . 0.948    no
C31 . C32 . 1.513(3)    yes
C31 . H311 . 0.963    no
C31 . H312 . 0.963    no
C32 . C33 . 1.394(4)    yes
C32 . C37 . 1.394(3)    yes
C33 . C34 . 1.383(4)    yes
C33 . H331 . 0.954    no
C34 . C35 . 1.383(5)    yes
C34 . H341 . 0.928    no
C35 . C36 . 1.378(4)    yes
C35 . H351 . 0.931    no
C36 . C37 . 1.388(4)    yes
C36 . H361 . 0.938    no
C37 . H371 . 0.936    no
C38 . C39 . 1.520(3)    yes
C38 . H381 . 0.978    no
C38 . H382 . 0.974    no
C39 . C40 . 1.389(4)    yes
C39 . C44 . 1.390(4)    yes
C40 . C41 . 1.397(4)    yes
C40 . H401 . 0.920    no
C41 . C42 . 1.371(5)    yes
C41 . H411 . 0.940    no
C42 . C43 . 1.377(5)    yes
C42 . H421 . 0.921    no
C43 . C44 . 1.395(4)    yes
C43 . H431 . 0.931    no
C44 . H441 . 0.929    no
O45 . C46 . 1.281(6)    yes
O45 . H451 . 0.950    no
C46 . C47 . 1.490(5)    yes
C46 . C48 . 1.449(6)    yes
C46 . H461 . 0.984    no
C47 . H471 . 0.962    no
C47 . H473 . 0.975    no
C47 . H472 . 0.963    no
C48 . H481 . 0.950    no
C48 . H482 . 0.950    no
C48 . H483 . 0.950    no
loop_
 _geom_angle_atom_site_label_1
 _geom_angle_site_symmetry_1
 _geom_angle_atom_site_label_2
 _geom_angle_site_symmetry_2
 _geom_angle_atom_site_label_3
 _geom_angle_site_symmetry_3
 _geom_angle
 _geom_angle_publ_flag
O2 . C3 . O4 . 125.9(2)    yes
O2 . C3 . C9 . 124.6(2)    yes
O4 . C3 . C9 . 109.5(2)    yes
C3 . O4 . C5 . 121.0(2)    yes
O4 . C5 . C6 . 102.2(2)    yes
O4 . C5 . C7 . 108.9(3)    yes
C6 . C5 . C7 . 109.9(3)    yes
O4 . C5 . C8 . 109.9(3)    yes
C6 . C5 . C8 . 111.5(3)    yes
C7 . C5 . C8 . 113.8(4)    yes
C5 . C6 . H61 . 109.4    no
C5 . C6 . H63 . 111.9    no
H61 . C6 . H63 . 107.8    no
C5 . C6 . H62 . 109.4    no
H61 . C6 . H62 . 108.6    no
H63 . C6 . H62 . 109.7    no
C5 . C7 . H71 . 109.2    no
C5 . C7 . H73 . 109.2    no
H71 . C7 . H73 . 109.6    no
C5 . C7 . H72 . 109.3    no
H71 . C7 . H72 . 109.4    no
H73 . C7 . H72 . 110.0    no
C5 . C8 . H81 . 108.6    no
C5 . C8 . H82 . 110.9    no
H81 . C8 . H82 . 109.2    no
C5 . C8 . H83 . 109.9    no
H81 . C8 . H83 . 108.3    no
H82 . C8 . H83 . 109.8    no
C3 . C9 . C10 . 111.7(2)    yes
C3 . C9 . H91 . 108.4    no
C10 . C9 . H91 . 111.2    no
C3 . C9 . H92 . 108.5    no
C10 . C9 . H92 . 108.0    no
H91 . C9 . H92 . 109.1    no
C9 . C10 . N11 . 112.96(18)    yes
C9 . C10 . C22 . 114.43(19)    yes
N11 . C10 . C22 . 107.89(17)    yes
C9 . C10 . H101 . 107.3    no
N11 . C10 . H101 . 107.8    no
C22 . C10 . H101 . 106.1    no
C10 . N11 . C12 . 114.11(17)    yes
C10 . N11 . C19 . 115.71(18)    yes
C12 . N11 . C19 . 112.70(18)    yes
C10 . N11 . H111 . 103.5    no
C12 . N11 . H111 . 104.0    no
C19 . N11 . H111 . 105.2    no
N11 . C12 . C13 . 111.82(19)    yes
N11 . C12 . H122 . 108.3    no
C13 . C12 . H122 . 111.2    no
N11 . C12 . H121 . 105.9    no
C13 . C12 . H121 . 109.9    no
H122 . C12 . H121 . 109.5    no
C12 . C13 . C14 . 121.3(2)    yes
C12 . C13 . C18 . 119.7(2)    yes
C14 . C13 . C18 . 119.0(2)    yes
C13 . C14 . C15 . 120.0(3)    yes
C13 . C14 . H141 . 119.7    no
C15 . C14 . H141 . 120.3    no
C14 . C15 . C16 . 120.2(3)    yes
C14 . C15 . H151 . 120.0    no
C16 . C15 . H151 . 119.9    no
C15 . C16 . C17 . 120.0(3)    yes
C15 . C16 . H161 . 121.0    no
C17 . C16 . H161 . 119.0    no
C16 . C17 . C18 . 120.2(3)    yes
C16 . C17 . H171 . 120.3    no
C18 . C17 . H171 . 119.5    no
C13 . C18 . C17 . 120.7(3)    yes
C13 . C18 . H181 . 119.7    no
C17 . C18 . H181 . 119.6    no
N11 . C19 . C20 . 111.0(2)    yes
N11 . C19 . C21 . 112.9(2)    yes
C20 . C19 . C21 . 111.4(2)    yes
N11 . C19 . H191 . 105.1    no
C20 . C19 . H191 . 108.6    no
C21 . C19 . H191 . 107.6    no
C19 . C20 . H201 . 109.8    no
C19 . C20 . H203 . 112.3    no
H201 . C20 . H203 . 107.8    no
C19 . C20 . H202 . 111.4    no
H201 . C20 . H202 . 107.6    no
H203 . C20 . H202 . 107.7    no
C19 . C21 . H211 . 108.1    no
C19 . C21 . H212 . 110.8    no
H211 . C21 . H212 . 107.8    no
C19 . C21 . H213 . 112.3    no
H211 . C21 . H213 . 106.9    no
H212 . C21 . H213 . 110.7    no
C10 . C22 . N23 . 107.49(17)    yes
C10 . C22 . C38 . 111.15(18)    yes
N23 . C22 . C38 . 113.69(18)    yes
C10 . C22 . H221 . 108.1    no
N23 . C22 . H221 . 108.0    no
C38 . C22 . H221 . 108.3    no
C22 . N23 . C24 . 114.35(17)    yes
C22 . N23 . C31 . 113.92(18)    yes
C24 . N23 . C31 . 113.73(18)    yes
N23 . C24 . C25 . 113.69(19)    yes
N23 . C24 . H241 . 107.6    no
C25 . C24 . H241 . 108.9    no
N23 . C24 . H242 . 109.3    no
C25 . C24 . H242 . 108.4    no
H241 . C24 . H242 . 108.8    no
C24 . C25 . C26 . 123.6(2)    yes
C24 . C25 . C30 . 117.8(2)    yes
C26 . C25 . C30 . 118.6(2)    yes
C25 . C26 . C27 . 120.3(3)    yes
C25 . C26 . H261 . 119.8    no
C27 . C26 . H261 . 119.9    no
C26 . C27 . C28 . 120.4(3)    yes
C26 . C27 . H271 . 118.8    no
C28 . C27 . H271 . 120.8    no
C27 . C28 . C29 . 119.7(3)    yes
C27 . C28 . H281 . 119.9    no
C29 . C28 . H281 . 120.4    no
C28 . C29 . C30 . 120.1(3)    yes
C28 . C29 . H291 . 120.8    no
C30 . C29 . H291 . 119.0    no
C25 . C30 . C29 . 120.9(3)    yes
C25 . C30 . H301 . 118.7    no
C29 . C30 . H301 . 120.4    no
N23 . C31 . C32 . 119.0(2)    yes
N23 . C31 . H311 . 105.9    no
C32 . C31 . H311 . 106.8    no
N23 . C31 . H312 . 108.3    no
C32 . C31 . H312 . 109.0    no
H311 . C31 . H312 . 107.4    no
C31 . C32 . C33 . 119.7(2)    yes
C31 . C32 . C37 . 122.5(2)    yes
C33 . C32 . C37 . 117.6(2)    yes
C32 . C33 . C34 . 121.3(3)    yes
C32 . C33 . H331 . 118.3    no
C34 . C33 . H331 . 120.4    no
C33 . C34 . C35 . 120.1(3)    yes
C33 . C34 . H341 . 119.1    no
C35 . C34 . H341 . 120.8    no
C34 . C35 . C36 . 119.8(3)    yes
C34 . C35 . H351 . 120.2    no
C36 . C35 . H351 . 120.0    no
C35 . C36 . C37 . 119.9(3)    yes
C35 . C36 . H361 . 119.8    no
C37 . C36 . H361 . 120.3    no
C32 . C37 . C36 . 121.4(2)    yes
C32 . C37 . H371 . 119.5    no
C36 . C37 . H371 . 119.1    no
C22 . C38 . C39 . 117.1(2)    yes
C22 . C38 . H381 . 108.0    no
C39 . C38 . H381 . 106.3    no
C22 . C38 . H382 . 109.0    no
C39 . C38 . H382 . 107.7    no
H381 . C38 . H382 . 108.5    no
C38 . C39 . C40 . 120.5(2)    yes
C38 . C39 . C44 . 120.8(2)    yes
C40 . C39 . C44 . 118.6(2)    yes
C39 . C40 . C41 . 120.4(3)    yes
C39 . C40 . H401 . 120.2    no
C41 . C40 . H401 . 119.4    no
C40 . C41 . C42 . 120.6(3)    yes
C40 . C41 . H411 . 119.8    no
C42 . C41 . H411 . 119.6    no
C41 . C42 . C43 . 119.6(3)    yes
C41 . C42 . H421 . 119.8    no
C43 . C42 . H421 . 120.6    no
C42 . C43 . C44 . 120.5(3)    yes
C42 . C43 . H431 . 119.1    no
C44 . C43 . H431 . 120.5    no
C43 . C44 . C39 . 120.4(3)    yes
C43 . C44 . H441 . 120.2    no
C39 . C44 . H441 . 119.4    no
C46 . O45 . H451 . 109.6    no
O45 . C46 . C47 . 111.1(4)    yes
O45 . C46 . C48 . 117.7(5)    yes
C47 . C46 . C48 . 114.5(4)    yes
O45 . C46 . H461 . 96.6    no
C47 . C46 . H461 . 108.2    no
C48 . C46 . H461 . 106.7    no
C46 . C47 . H471 . 109.8    no
C46 . C47 . H473 . 108.5    no
H471 . C47 . H473 . 108.8    no
C46 . C47 . H472 . 109.5    no
H471 . C47 . H472 . 111.6    no
H473 . C47 . H472 . 108.7    no
C46 . C48 . H481 . 109.6    no
C46 . C48 . H482 . 109.1    no
H481 . C48 . H482 . 109.5    no
C46 . C48 . H483 . 109.7    no
H481 . C48 . H483 . 109.5    no
H482 . C48 . H483 . 109.5    no
loop_
 _geom_hbond_atom_site_label_D
 _geom_hbond_site_symmetry_D
 _geom_hbond_atom_site_label_H
 _geom_hbond_site_symmetry_H
 _geom_hbond_atom_site_label_A
 _geom_hbond_site_symmetry_A
 _geom_hbond_angle_DHA
 _geom_hbond_distance_DH
 _geom_hbond_distance_HA
 _geom_hbond_distance_DA
 _geom_hbond_publ_flag
C9 . H92 . C39 . 124 0.98 2.57 3.226(5)    yes
N11 . H111 . N23 . 125 0.89 2.07 2.686(5)    yes

#==============================================================================
data_43 
_ccdc_journal_depnumber            '852573'
#==============================================================================

_cell_length_a                    11.68976(18)
_cell_length_b                    14.9507(2)
_cell_length_c                    18.3439(3)
_cell_angle_alpha                 90
_cell_angle_beta                  90
_cell_angle_gamma                 90
_cell_volume                      3205.97(8)
 
_symmetry_cell_setting            'Orthorhombic' 
_symmetry_space_group_name_H-M    'P 21 21 21' 
_symmetry_space_group_name_Hall   'P 2ac 2ac' 
loop_
 _symmetry_equiv_pos_as_xyz
 'x,y,z'
 'x+1/2,-y+1/2,-z'
 '-x,y+1/2,-z+1/2'
 '-x+1/2,-y,z+1/2'

loop_
_atom_type_symbol
_atom_type_scat_dispersion_real
_atom_type_scat_dispersion_imag
_atom_type_scat_Cromer_Mann_a1
_atom_type_scat_Cromer_Mann_b1
_atom_type_scat_Cromer_Mann_a2
_atom_type_scat_Cromer_Mann_b2
_atom_type_scat_Cromer_Mann_a3
_atom_type_scat_Cromer_Mann_b3
_atom_type_scat_Cromer_Mann_a4
_atom_type_scat_Cromer_Mann_b4
_atom_type_scat_Cromer_Mann_c
_atom_type_scat_source  
 C       0.0181   0.0091   2.3100  20.8439   1.0200  10.2075   1.5886   0.5687
   0.8650  51.6512   0.2156 'International Tables Vol C 4.2.6.8 and 6.1.1.4'
 H       0.0000   0.0000   0.4930  10.5109   0.3229  26.1257   0.1402   3.1424
   0.0408  57.7998   0.0030 'International Tables Vol C 4.2.6.8 and 6.1.1.4'
 N       0.0311   0.0180  12.2126   0.0057   3.1322   9.8933   2.0125  28.9975
   1.1663   0.5826 -11.5290 'International Tables Vol C 4.2.6.8 and 6.1.1.4'
 O       0.0492   0.0322   3.0485  13.2771   2.2868   5.7011   1.5463   0.3239
   0.8670  32.9089   0.2508 'International Tables Vol C 4.2.6.8 and 6.1.1.4'
 
_cell_formula_units_Z                    4

# Given Formula = C38 H46 N1 O2 
# Dc =      1.14 Fooo =   1216.00 Mu =      5.27 M =    548.79
# Found Formula = C38 H46 N2 O2 
# Dc =      1.17 FOOO =   1216.00 Mu =      5.49 M =    562.80

_chemical_formula_sum             'C38 H46 N2 O2'
_chemical_formula_moiety          'C38 H46 N2 O2'
_chemical_compound_source                .
_chemical_formula_weight            562.80
 
_cell_measurement_reflns_used            0
_cell_measurement_theta_min              0
_cell_measurement_theta_max              0
_cell_measurement_temperature          150
 
_exptl_crystal_description        'block' 
_exptl_crystal_colour             'colourless' 
_exptl_crystal_size_min           0.180 
_exptl_crystal_size_mid           0.220 
_exptl_crystal_size_max           0.240 
 
_exptl_crystal_density_diffrn     1.166 
_exptl_crystal_density_meas       . 
_exptl_crystal_density_method     'not measured' 
# Non-dispersive F(000): 
_exptl_crystal_F_000              1216 
_exptl_absorpt_coefficient_mu     0.549 
 
# Sheldrick geometric approximatio 0.89 0.91 
_exptl_absorpt_correction_type    none 
_exptl_absorpt_correction_T_min   0.8862 
_exptl_absorpt_correction_T_max   0.9059 
_diffrn_measurement_device_type   'Unknown' 
_diffrn_measurement_device        'Serial' 
_diffrn_radiation_monochromator   'graphite' 
_diffrn_radiation_type            'Cu K\a'
_diffrn_radiation_wavelength           1.54184
_diffrn_measurement_method        \w/2\q 
 
# If a reference occurs more than once, delete the author 
# and date from subsequent references. 
_computing_data_collection        'USER DEFINED DATA COLLECTION' 
_computing_cell_refinement        'USER DEFINED CELL REFINEMENT' 
_computing_data_reduction         'USER DEFINED DATA REDUCTION' 
_computing_structure_solution     'SIR92 (Altomare et al., 1994)' 
_computing_structure_refinement   'CRYSTALS (Betteridge et al., 2003)' 
_computing_publication_material   'CRYSTALS (Betteridge et al., 2003)' 
_computing_molecular_graphics     'CAMERON (Watkin et al., 1996)' 
 
_diffrn_standards_interval_time   . 
_diffrn_standards_interval_count  . 
_diffrn_standards_number          0 
_diffrn_standards_decay_%         . 
 
_diffrn_ambient_temperature        150
_diffrn_reflns_number             10951 
_reflns_number_total              6240 
_diffrn_reflns_av_R_equivalents   0.000 
# Number of reflections without Friedels Law is 0 
# Number of reflections with Friedels Law is 3730 
# Theoretical number of reflections is about 2848 
 
_diffrn_reflns_theta_min          3.814 
_diffrn_reflns_theta_max          76.440 
_diffrn_measured_fraction_theta_max 0.992 
 
_diffrn_reflns_theta_full         74.911 
_diffrn_measured_fraction_theta_full 0.996 
 
_diffrn_reflns_limit_h_min        -14 
_diffrn_reflns_limit_h_max        14 
_diffrn_reflns_limit_k_min        -18 
_diffrn_reflns_limit_k_max        10 
_diffrn_reflns_limit_l_min        -22 
_diffrn_reflns_limit_l_max        20 
_reflns_limit_h_min               -14 
_reflns_limit_h_max               14 
_reflns_limit_k_min               0 
_reflns_limit_k_max               18 
_reflns_limit_l_min               0 
_reflns_limit_l_max               22 
 
_oxford_diffrn_Wilson_B_factor    2.72 
_oxford_diffrn_Wilson_scale       0.04 
 
_atom_sites_solution_primary      direct #heavy,direct,difmap,geom
# _atom_sites_solution_secondary  difmap
_atom_sites_solution_hydrogens    geom
 
_refine_diff_density_min          -0.21 
_refine_diff_density_max          0.15 
 
# The current dictionary definitions do not cover the 
# situation where the reflections used for refinement were 
# selected by a user-defined sigma threshold 
 
# The values actually used during refinement 
_oxford_reflns_threshold_expression_ref     I>-3.0\s(I)
_refine_ls_number_reflns          9922 
_refine_ls_number_restraints      0 
_refine_ls_number_parameters      380 
_oxford_refine_ls_R_factor_ref    0.0403 
_refine_ls_wR_factor_ref          0.0936 
_refine_ls_goodness_of_fit_ref    1.0090 
_refine_ls_shift/su_max           0.0004842 
_refine_ls_shift/su_mean          0.0000463 
 
# The values computed from all data 
_oxford_reflns_number_all         9922 
_refine_ls_R_factor_all           0.0403 
_refine_ls_wR_factor_all          0.0936 
 
# The values computed with a 2 sigma cutoff - a la SHELX 
_reflns_threshold_expression      I>2.0\s(I)
_reflns_number_gt                 9213 
_refine_ls_R_factor_gt            0.0365 
_refine_ls_wR_factor_gt           0.0894 
 
_refine_ls_abs_structure_Flack    -0.25(17) 
_refine_ls_abs_structure_details  'Flack (1983), 3730 Friedel-pairs' 
# choose from: rm (reference molecule of known chirality), 
# ad (anomolous dispersion - Flack), rmad (rm and ad), 
# syn (from synthesis), unk (unknown) or . (not applicable). 
_chemical_absolute_configuration  'ad' 
 
_refine_ls_structure_factor_coef  Fsqd 
_refine_ls_matrix_type            full
_refine_ls_hydrogen_treatment     none           # none, undef, noref, refall,
                                                 # refxyz, refU, constr or mixed
_refine_ls_weighting_scheme       calc 
_refine_ls_weighting_details 
;
 Method= Modified Sheldrick 
 w=1/[\s^2^(F^2^) + ( 0.05P)^2^ + 0.32P] 
 ,where P=(max(Fo^2^,0) + 2Fc^2^)/3 
;
# Insert your own references if required - in alphabetical order 
_publ_section_references 
; 
User-defined data collection reference 
 
User defined data reduction 
 
User defined cell refinement 
 
Altomare, A., Cascarano, G., Giacovazzo, C., Guagliardi, A., Burla, M.C., 
Polidori, G. & Camalli, M. (1994). J. Appl. Cryst. 27, 435. 
 
Betteridge, P.W., Carruthers, J.R., Cooper, R.I., 
Prout, K. & Watkin, D.J. (2003). J. Appl. Cryst. 36, 1487. 
 
Flack, H. D. (1983). Acta Cryst. A39, 876-881. 
 
Watkin, D.J., Prout, C.K. & Pearce, L.J. (1996). CAMERON, Chemical 
Crystallography Laboratory, Oxford, UK. 
; 

# Uequiv = arithmetic mean of Ui i.e. Ueqiv = (U1+U2+U3)/3

# Replace last . with number of unfound hydrogen atomsattached to an atom.

# ..._refinement_flags_... 
# . no refinement constraints           S special position constraint on site
# G rigid group refinement of site      R riding atom
# D distance or angle restraint on site T thermal displacement constraints
# U Uiso or Uij restraint (rigid bond)  P partial occupancy constraint

loop_
_atom_site_label
_atom_site_type_symbol
_atom_site_fract_x
_atom_site_fract_y
_atom_site_fract_z
_atom_site_U_iso_or_equiv
_atom_site_occupancy
_atom_site_adp_type
_atom_site_refinement_flags_posn
_atom_site_refinement_flags_adp
_atom_site_refinement_flags_occupancy
_atom_site_disorder_assembly
_atom_site_disorder_group
_oxford_atom_site_special_shape
_atom_site_attached_hydrogens
O1 O 0.01820(9) 0.24807(6) 0.91732(5) 0.0328 1.0000 Uani . . . . . . . 
C2 C -0.00734(12) 0.21314(8) 0.86050(7) 0.0245 1.0000 Uani . . . . . . . 
O3 O -0.11266(8) 0.18398(6) 0.84185(5) 0.0281 1.0000 Uani . . . . . . . 
C4 C -0.20963(12) 0.18050(9) 0.89351(8) 0.0294 1.0000 Uani . . . . . . . 
C5 C -0.24284(15) 0.27474(10) 0.91714(10) 0.0418 1.0000 Uani . . . . . . . 
C6 C -0.30254(13) 0.13729(11) 0.84792(9) 0.0407 1.0000 Uani . . . . . . . 
C7 C -0.17807(14) 0.12169(10) 0.95793(8) 0.0367 1.0000 Uani . . . . . . . 
C8 C 0.07387(11) 0.18953(9) 0.79999(7) 0.0253 1.0000 Uani . . . . . . . 
C9 C 0.18560(11) 0.24392(8) 0.79373(7) 0.0201 1.0000 Uani . . . . . . . 
N10 N 0.28666(9) 0.19021(7) 0.77488(6) 0.0212 1.0000 Uani . . . . . . . 
C11 C 0.26539(12) 0.12687(8) 0.71587(7) 0.0264 1.0000 Uani . . . . . . . 
C12 C 0.37261(12) 0.09819(8) 0.67545(7) 0.0246 1.0000 Uani . . . . . . . 
C13 C 0.46426(13) 0.15543(9) 0.66461(8) 0.0336 1.0000 Uani . . . . . . . 
C14 C 0.55951(14) 0.12728(11) 0.62518(9) 0.0376 1.0000 Uani . . . . . . . 
C15 C 0.56324(14) 0.04242(10) 0.59525(8) 0.0359 1.0000 Uani . . . . . . . 
C16 C 0.47218(14) -0.01444(10) 0.60520(8) 0.0358 1.0000 Uani . . . . . . . 
C17 C 0.37759(13) 0.01264(9) 0.64544(7) 0.0305 1.0000 Uani . . . . . . . 
C18 C 0.34938(12) 0.15126(8) 0.83723(8) 0.0272 1.0000 Uani . . . . . . . 
C19 C 0.41038(14) 0.22435(10) 0.88028(8) 0.0366 1.0000 Uani . . . . . . . 
C20 C 0.27947(15) 0.09207(10) 0.88811(9) 0.0432 1.0000 Uani . . . . . . . 
C21 C 0.16720(11) 0.32051(8) 0.73703(7) 0.0199 1.0000 Uani . . . . . . . 
N22 N 0.09654(9) 0.39265(6) 0.77028(6) 0.0206 1.0000 Uani . . . . . . . 
C23 C 0.04688(12) 0.45056(8) 0.71356(7) 0.0234 1.0000 Uani . . . . . . . 
C24 C -0.05031(11) 0.40723(8) 0.67274(7) 0.0225 1.0000 Uani . . . . . . . 
C25 C -0.05645(13) 0.41177(9) 0.59654(7) 0.0274 1.0000 Uani . . . . . . . 
C26 C -0.14992(14) 0.37690(9) 0.55963(8) 0.0330 1.0000 Uani . . . . . . . 
C27 C -0.23784(14) 0.33659(10) 0.59770(9) 0.0366 1.0000 Uani . . . . . . . 
C28 C -0.23196(13) 0.33058(10) 0.67323(9) 0.0355 1.0000 Uani . . . . . . . 
C29 C -0.13857(12) 0.36557(9) 0.71027(7) 0.0284 1.0000 Uani . . . . . . . 
C30 C 0.15842(12) 0.44789(8) 0.82410(7) 0.0249 1.0000 Uani . . . . . . . 
C31 C 0.07793(11) 0.50999(8) 0.86425(7) 0.0226 1.0000 Uani . . . . . . . 
C32 C 0.09536(12) 0.60166(9) 0.86235(7) 0.0256 1.0000 Uani . . . . . . . 
C33 C 0.02061(13) 0.65986(9) 0.89731(7) 0.0301 1.0000 Uani . . . . . . . 
C34 C -0.07317(14) 0.62633(10) 0.93371(7) 0.0320 1.0000 Uani . . . . . . . 
C35 C -0.09135(14) 0.53462(11) 0.93631(7) 0.0336 1.0000 Uani . . . . . . . 
C36 C -0.01607(13) 0.47679(9) 0.90230(7) 0.0283 1.0000 Uani . . . . . . . 
C37 C 0.27404(12) 0.35331(8) 0.69804(7) 0.0227 1.0000 Uani . . . . . . . 
C38 C 0.37132(12) 0.38498(8) 0.73378(8) 0.0252 1.0000 Uani . . . . . . . 
C39 C 0.46443(13) 0.41745(9) 0.69510(8) 0.0321 1.0000 Uani . . . . . . . 
C40 C 0.46232(14) 0.41902(11) 0.61940(9) 0.0390 1.0000 Uani . . . . . . . 
C41 C 0.36644(15) 0.38823(11) 0.58315(8) 0.0410 1.0000 Uani . . . . . . . 
C42 C 0.27337(13) 0.35594(10) 0.62199(8) 0.0319 1.0000 Uani . . . . . . . 
H51 H -0.3142 0.2711 0.9453 0.0627 1.0000 Uiso R . . . . . . 
H52 H -0.1803 0.3008 0.9478 0.0619 1.0000 Uiso R . . . . . . 
H53 H -0.2573 0.3102 0.8739 0.0630 1.0000 Uiso R . . . . . . 
H63 H -0.3714 0.1278 0.8754 0.0556 1.0000 Uiso R . . . . . . 
H62 H -0.2765 0.0814 0.8272 0.0554 1.0000 Uiso R . . . . . . 
H61 H -0.3205 0.1769 0.8082 0.0569 1.0000 Uiso R . . . . . . 
H73 H -0.2447 0.1150 0.9877 0.0498 1.0000 Uiso R . . . . . . 
H72 H -0.1193 0.1498 0.9864 0.0500 1.0000 Uiso R . . . . . . 
H71 H -0.1592 0.0627 0.9403 0.0493 1.0000 Uiso R . . . . . . 
H81 H 0.0891 0.1274 0.8085 0.0293 1.0000 Uiso R . . . . . . 
H82 H 0.0354 0.1906 0.7542 0.0283 1.0000 Uiso R . . . . . . 
H91 H 0.2020 0.2732 0.8426 0.0207 1.0000 Uiso R . . . . . . 
H111 H 0.2268 0.0719 0.7325 0.0295 1.0000 Uiso R . . . . . . 
H112 H 0.2180 0.1535 0.6802 0.0297 1.0000 Uiso R . . . . . . 
H131 H 0.4617 0.2136 0.6823 0.0355 1.0000 Uiso R . . . . . . 
H141 H 0.6231 0.1659 0.6200 0.0400 1.0000 Uiso R . . . . . . 
H151 H 0.6319 0.0266 0.5687 0.0430 1.0000 Uiso R . . . . . . 
H161 H 0.4720 -0.0749 0.5857 0.0411 1.0000 Uiso R . . . . . . 
H171 H 0.3115 -0.0252 0.6519 0.0338 1.0000 Uiso R . . . . . . 
H181 H 0.4098 0.1123 0.8159 0.0312 1.0000 Uiso R . . . . . . 
H191 H 0.4526 0.1932 0.9199 0.0502 1.0000 Uiso R . . . . . . 
H192 H 0.3520 0.2640 0.9026 0.0499 1.0000 Uiso R . . . . . . 
H193 H 0.4600 0.2557 0.8475 0.0499 1.0000 Uiso R . . . . . . 
H201 H 0.3340 0.0678 0.9231 0.0674 1.0000 Uiso R . . . . . . 
H202 H 0.2242 0.1263 0.9133 0.0666 1.0000 Uiso R . . . . . . 
H203 H 0.2461 0.0438 0.8620 0.0679 1.0000 Uiso R . . . . . . 
H211 H 0.1200 0.2953 0.6974 0.0200 1.0000 Uiso R . . . . . . 
H231 H 0.0170 0.5044 0.7362 0.0260 1.0000 Uiso R . . . . . . 
H232 H 0.1083 0.4713 0.6803 0.0260 1.0000 Uiso R . . . . . . 
H251 H 0.0019 0.4430 0.5695 0.0334 1.0000 Uiso R . . . . . . 
H261 H -0.1527 0.3809 0.5062 0.0349 1.0000 Uiso R . . . . . . 
H271 H -0.3012 0.3110 0.5729 0.0420 1.0000 Uiso R . . . . . . 
H281 H -0.2908 0.3013 0.7010 0.0401 1.0000 Uiso R . . . . . . 
H291 H -0.1351 0.3587 0.7627 0.0338 1.0000 Uiso R . . . . . . 
H301 H 0.1903 0.4091 0.8591 0.0287 1.0000 Uiso R . . . . . . 
H302 H 0.2204 0.4833 0.8019 0.0276 1.0000 Uiso R . . . . . . 
H321 H 0.1570 0.6261 0.8375 0.0284 1.0000 Uiso R . . . . . . 
H331 H 0.0340 0.7215 0.8941 0.0334 1.0000 Uiso R . . . . . . 
H341 H -0.1243 0.6658 0.9555 0.0369 1.0000 Uiso R . . . . . . 
H351 H -0.1539 0.5118 0.9603 0.0395 1.0000 Uiso R . . . . . . 
H361 H -0.0227 0.4164 0.9040 0.0309 1.0000 Uiso R . . . . . . 
H381 H 0.3735 0.3856 0.7875 0.0288 1.0000 Uiso R . . . . . . 
H391 H 0.5324 0.4403 0.7203 0.0383 1.0000 Uiso R . . . . . . 
H401 H 0.5246 0.4415 0.5918 0.0463 1.0000 Uiso R . . . . . . 
H411 H 0.3626 0.3907 0.5312 0.0503 1.0000 Uiso R . . . . . . 
H421 H 0.2069 0.3355 0.5981 0.0342 1.0000 Uiso R . . . . . . 
loop_
_atom_site_aniso_label
_atom_site_aniso_U_11
_atom_site_aniso_U_22
_atom_site_aniso_U_33
_atom_site_aniso_U_23
_atom_site_aniso_U_13
_atom_site_aniso_U_12
O1 0.0341(6) 0.0334(5) 0.0310(5) -0.0038(4) 0.0038(4) -0.0043(5) 
C2 0.0237(7) 0.0214(6) 0.0284(7) 0.0030(5) 0.0008(6) 0.0000(5) 
O3 0.0203(5) 0.0339(5) 0.0301(5) 0.0007(4) 0.0010(4) -0.0011(4) 
C4 0.0239(7) 0.0298(6) 0.0346(7) 0.0024(6) 0.0066(6) 0.0020(6) 
C5 0.0392(9) 0.0314(7) 0.0548(10) 0.0021(7) 0.0127(8) 0.0054(7) 
C6 0.0237(7) 0.0468(8) 0.0516(10) -0.0011(8) 0.0047(7) -0.0020(7) 
C7 0.0411(9) 0.0334(7) 0.0357(8) 0.0048(6) 0.0090(7) 0.0038(7) 
C8 0.0220(7) 0.0254(6) 0.0285(7) -0.0027(5) 0.0034(6) -0.0038(6) 
C9 0.0190(6) 0.0190(5) 0.0224(6) -0.0012(5) -0.0002(5) 0.0000(5) 
N10 0.0210(5) 0.0198(4) 0.0229(5) -0.0041(4) -0.0004(4) 0.0030(4) 
C11 0.0253(7) 0.0235(6) 0.0303(7) -0.0093(5) -0.0007(6) 0.0000(6) 
C12 0.0267(7) 0.0239(6) 0.0231(6) -0.0038(5) -0.0017(5) 0.0051(6) 
C13 0.0318(8) 0.0281(6) 0.0409(8) -0.0096(6) 0.0027(7) 0.0011(6) 
C14 0.0291(8) 0.0394(8) 0.0442(9) -0.0055(7) 0.0061(7) -0.0011(7) 
C15 0.0329(8) 0.0450(8) 0.0299(7) -0.0045(6) 0.0037(6) 0.0119(7) 
C16 0.0462(9) 0.0292(7) 0.0321(7) -0.0085(6) -0.0007(7) 0.0113(7) 
C17 0.0359(8) 0.0254(6) 0.0302(7) -0.0035(6) -0.0007(6) 0.0028(6) 
C18 0.0265(7) 0.0262(6) 0.0288(7) -0.0003(5) -0.0028(6) 0.0084(6) 
C19 0.0345(8) 0.0415(8) 0.0338(8) -0.0081(6) -0.0125(7) 0.0124(7) 
C20 0.0497(10) 0.0403(8) 0.0397(9) 0.0152(7) 0.0006(8) 0.0068(8) 
C21 0.0190(6) 0.0189(5) 0.0218(6) -0.0021(5) -0.0019(5) 0.0017(5) 
N22 0.0213(5) 0.0182(5) 0.0223(5) -0.0021(4) -0.0027(5) 0.0028(4) 
C23 0.0236(7) 0.0198(5) 0.0270(7) 0.0024(5) -0.0019(5) 0.0025(5) 
C24 0.0215(7) 0.0204(5) 0.0256(7) 0.0006(5) -0.0028(5) 0.0037(5) 
C25 0.0305(7) 0.0266(6) 0.0250(7) 0.0057(5) -0.0012(6) 0.0000(6) 
C26 0.0407(9) 0.0320(7) 0.0265(7) 0.0039(6) -0.0107(6) 0.0000(7) 
C27 0.0341(8) 0.0363(7) 0.0395(8) 0.0056(6) -0.0163(7) -0.0034(7) 
C28 0.0253(8) 0.0411(8) 0.0401(8) 0.0113(7) -0.0037(6) -0.0063(7) 
C29 0.0267(7) 0.0323(7) 0.0263(7) 0.0044(6) -0.0018(6) 0.0017(6) 
C30 0.0246(7) 0.0230(6) 0.0270(7) -0.0048(5) -0.0031(5) -0.0013(6) 
C31 0.0241(7) 0.0226(6) 0.0211(6) -0.0018(5) -0.0040(5) 0.0036(5) 
C32 0.0272(7) 0.0242(6) 0.0254(6) -0.0019(5) -0.0019(6) 0.0003(6) 
C33 0.0406(8) 0.0230(6) 0.0267(7) -0.0043(5) -0.0080(6) 0.0067(6) 
C34 0.0375(8) 0.0372(7) 0.0212(6) -0.0040(5) -0.0003(6) 0.0154(7) 
C35 0.0334(8) 0.0437(8) 0.0237(7) 0.0051(6) 0.0050(6) 0.0023(7) 
C36 0.0322(8) 0.0253(6) 0.0275(7) 0.0017(5) 0.0003(6) -0.0014(6) 
C37 0.0239(7) 0.0208(5) 0.0236(6) -0.0011(5) 0.0033(5) 0.0026(5) 
C38 0.0238(7) 0.0223(6) 0.0294(7) 0.0001(5) 0.0019(6) 0.0008(6) 
C39 0.0253(7) 0.0300(6) 0.0412(8) -0.0014(6) 0.0045(6) -0.0027(6) 
C40 0.0331(9) 0.0428(8) 0.0411(9) 0.0042(7) 0.0143(7) -0.0013(7) 
C41 0.0438(9) 0.0514(9) 0.0279(7) 0.0035(7) 0.0112(7) 0.0029(8) 
C42 0.0312(8) 0.0382(7) 0.0262(7) -0.0026(6) 0.0012(6) 0.0031(6) 

_refine_ls_extinction_method 
    'None'
_oxford_refine_ls_scale 4.23(4) 
loop_
 _geom_bond_atom_site_label_1
 _geom_bond_site_symmetry_1
 _geom_bond_atom_site_label_2
 _geom_bond_site_symmetry_2
 _geom_bond_distance
 _geom_bond_publ_flag
O1 . C2 . 1.2034(16)    yes
C2 . O3 . 1.3501(16)    yes
C2 . C8 . 1.5027(18)    yes
O3 . C4 . 1.4783(16)    yes
C4 . C5 . 1.5244(19)    yes
C4 . C6 . 1.515(2)    yes
C4 . C7 . 1.518(2)    yes
C5 . H51 . 0.983    no
C5 . H52 . 1.001    no
C5 . H53 . 0.969    no
C6 . H63 . 0.960    no
C6 . H62 . 0.967    no
C6 . H61 . 0.962    no
C7 . H73 . 0.956    no
C7 . H72 . 0.960    no
C7 . H71 . 0.965    no
C8 . C9 . 1.5429(17)    yes
C8 . H81 . 0.959    no
C8 . H82 . 0.953    no
C9 . N10 . 1.4697(16)    yes
C9 . C21 . 1.5617(16)    yes
C9 . H91 . 1.016    no
N10 . C11 . 1.4596(16)    yes
N10 . C18 . 1.4780(17)    yes
C11 . C12 . 1.5181(18)    yes
C11 . H111 . 0.986    no
C11 . H112 . 0.946    no
C12 . C13 . 1.386(2)    yes
C12 . C17 . 1.3936(18)    yes
C13 . C14 . 1.393(2)    yes
C13 . H131 . 0.928    no
C14 . C15 . 1.383(2)    yes
C14 . H141 . 0.947    no
C15 . C16 . 1.375(2)    yes
C15 . H151 . 0.968    no
C16 . C17 . 1.390(2)    yes
C16 . H161 . 0.972    no
C17 . H171 . 0.966    no
C18 . C19 . 1.525(2)    yes
C18 . C20 . 1.524(2)    yes
C18 . H181 . 0.995    no
C19 . H191 . 0.995    no
C19 . H192 . 0.992    no
C19 . H193 . 0.958    no
C20 . H201 . 0.975    no
C20 . H202 . 0.945    no
C20 . H203 . 0.950    no
C21 . N22 . 1.4892(15)    yes
C21 . C37 . 1.5204(18)    yes
C21 . H211 . 0.988    no
N22 . C23 . 1.4729(16)    yes
N22 . C30 . 1.4764(16)    yes
C23 . C24 . 1.5070(18)    yes
C23 . H231 . 0.971    no
C23 . H232 . 0.991    no
C24 . C25 . 1.4013(19)    yes
C24 . C29 . 1.3879(19)    yes
C25 . C26 . 1.387(2)    yes
C25 . H251 . 0.964    no
C26 . C27 . 1.381(2)    yes
C26 . H261 . 0.982    no
C27 . C28 . 1.390(2)    yes
C27 . H271 . 0.949    no
C28 . C29 . 1.388(2)    yes
C28 . H281 . 0.962    no
C29 . H291 . 0.969    no
C30 . C31 . 1.5132(18)    yes
C30 . H301 . 0.942    no
C30 . H302 . 0.985    no
C31 . C32 . 1.3860(18)    yes
C31 . C36 . 1.3933(19)    yes
C32 . C33 . 1.3900(19)    yes
C32 . H321 . 0.928    no
C33 . C34 . 1.378(2)    yes
C33 . H331 . 0.937    no
C34 . C35 . 1.388(2)    yes
C34 . H341 . 0.931    no
C35 . C36 . 1.382(2)    yes
C35 . H351 . 0.919    no
C36 . H361 . 0.906    no
C37 . C38 . 1.3954(19)    yes
C37 . C42 . 1.3957(19)    yes
C38 . C39 . 1.3871(19)    yes
C38 . H381 . 0.987    no
C39 . C40 . 1.389(2)    yes
C39 . H391 . 0.980    no
C40 . C41 . 1.382(2)    yes
C40 . H401 . 0.948    no
C41 . C42 . 1.387(2)    yes
C41 . H411 . 0.954    no
C42 . H421 . 0.942    no
loop_
 _geom_angle_atom_site_label_1
 _geom_angle_site_symmetry_1
 _geom_angle_atom_site_label_2
 _geom_angle_site_symmetry_2
 _geom_angle_atom_site_label_3
 _geom_angle_site_symmetry_3
 _geom_angle
 _geom_angle_publ_flag
O1 . C2 . O3 . 125.86(13)    yes
O1 . C2 . C8 . 125.80(13)    yes
O3 . C2 . C8 . 108.25(11)    yes
C2 . O3 . C4 . 123.25(10)    yes
O3 . C4 . C5 . 110.19(11)    yes
O3 . C4 . C6 . 102.17(11)    yes
C5 . C4 . C6 . 111.62(13)    yes
O3 . C4 . C7 . 109.44(11)    yes
C5 . C4 . C7 . 112.07(13)    yes
C6 . C4 . C7 . 110.91(12)    yes
C4 . C5 . H51 . 108.3    no
C4 . C5 . H52 . 109.5    no
H51 . C5 . H52 . 110.2    no
C4 . C5 . H53 . 108.5    no
H51 . C5 . H53 . 108.3    no
H52 . C5 . H53 . 111.9    no
C4 . C6 . H63 . 112.0    no
C4 . C6 . H62 . 111.1    no
H63 . C6 . H62 . 110.1    no
C4 . C6 . H61 . 108.2    no
H63 . C6 . H61 . 107.8    no
H62 . C6 . H61 . 107.6    no
C4 . C7 . H73 . 107.9    no
C4 . C7 . H72 . 110.1    no
H73 . C7 . H72 . 108.6    no
C4 . C7 . H71 . 108.9    no
H73 . C7 . H71 . 106.3    no
H72 . C7 . H71 . 114.7    no
C2 . C8 . C9 . 117.78(11)    yes
C2 . C8 . H81 . 102.9    no
C9 . C8 . H81 . 111.5    no
C2 . C8 . H82 . 110.4    no
C9 . C8 . H82 . 109.0    no
H81 . C8 . H82 . 104.4    no
C8 . C9 . N10 . 114.20(9)    yes
C8 . C9 . C21 . 108.62(10)    yes
N10 . C9 . C21 . 110.77(10)    yes
C8 . C9 . H91 . 108.7    no
N10 . C9 . H91 . 106.9    no
C21 . C9 . H91 . 107.4    no
C9 . N10 . C11 . 113.08(10)    yes
C9 . N10 . C18 . 115.59(10)    yes
C11 . N10 . C18 . 113.75(10)    yes
N10 . C11 . C12 . 113.88(11)    yes
N10 . C11 . H111 . 112.9    no
C12 . C11 . H111 . 107.1    no
N10 . C11 . H112 . 109.9    no
C12 . C11 . H112 . 105.3    no
H111 . C11 . H112 . 107.3    no
C11 . C12 . C13 . 122.28(11)    yes
C11 . C12 . C17 . 119.12(12)    yes
C13 . C12 . C17 . 118.54(13)    yes
C12 . C13 . C14 . 120.40(13)    yes
C12 . C13 . H131 . 120.2    no
C14 . C13 . H131 . 119.4    no
C13 . C14 . C15 . 120.57(15)    yes
C13 . C14 . H141 . 119.7    no
C15 . C14 . H141 . 119.7    no
C14 . C15 . C16 . 119.36(14)    yes
C14 . C15 . H151 . 116.7    no
C16 . C15 . H151 . 123.9    no
C15 . C16 . C17 . 120.43(13)    yes
C15 . C16 . H161 . 121.9    no
C17 . C16 . H161 . 117.7    no
C12 . C17 . C16 . 120.69(14)    yes
C12 . C17 . H171 . 117.1    no
C16 . C17 . H171 . 122.1    no
N10 . C18 . C19 . 110.50(11)    yes
N10 . C18 . C20 . 115.90(12)    yes
C19 . C18 . C20 . 110.47(13)    yes
N10 . C18 . H181 . 106.2    no
C19 . C18 . H181 . 106.9    no
C20 . C18 . H181 . 106.3    no
C18 . C19 . H191 . 105.9    no
C18 . C19 . H192 . 108.7    no
H191 . C19 . H192 . 108.7    no
C18 . C19 . H193 . 108.0    no
H191 . C19 . H193 . 112.8    no
H192 . C19 . H193 . 112.5    no
C18 . C20 . H201 . 105.6    no
C18 . C20 . H202 . 110.6    no
H201 . C20 . H202 . 109.0    no
C18 . C20 . H203 . 110.7    no
H201 . C20 . H203 . 108.5    no
H202 . C20 . H203 . 112.2    no
C9 . C21 . N22 . 109.55(10)    yes
C9 . C21 . C37 . 115.89(10)    yes
N22 . C21 . C37 . 114.50(10)    yes
C9 . C21 . H211 . 106.7    no
N22 . C21 . H211 . 105.5    no
C37 . C21 . H211 . 103.7    no
C21 . N22 . C23 . 110.80(10)    yes
C21 . N22 . C30 . 114.03(10)    yes
C23 . N22 . C30 . 109.67(9)    yes
N22 . C23 . C24 . 113.29(10)    yes
N22 . C23 . H231 . 109.0    no
C24 . C23 . H231 . 107.4    no
N22 . C23 . H232 . 109.5    no
C24 . C23 . H232 . 112.0    no
H231 . C23 . H232 . 105.3    no
C23 . C24 . C25 . 120.89(12)    yes
C23 . C24 . C29 . 120.46(12)    yes
C25 . C24 . C29 . 118.58(13)    yes
C24 . C25 . C26 . 120.60(13)    yes
C24 . C25 . H251 . 120.1    no
C26 . C25 . H251 . 119.2    no
C25 . C26 . C27 . 120.22(13)    yes
C25 . C26 . H261 . 119.4    no
C27 . C26 . H261 . 120.4    no
C26 . C27 . C28 . 119.69(14)    yes
C26 . C27 . H271 . 121.0    no
C28 . C27 . H271 . 119.3    no
C27 . C28 . C29 . 120.16(14)    yes
C27 . C28 . H281 . 121.5    no
C29 . C28 . H281 . 118.4    no
C28 . C29 . C24 . 120.73(13)    yes
C28 . C29 . H291 . 118.6    no
C24 . C29 . H291 . 120.6    no
N22 . C30 . C31 . 111.35(11)    yes
N22 . C30 . H301 . 107.7    no
C31 . C30 . H301 . 107.0    no
N22 . C30 . H302 . 112.6    no
C31 . C30 . H302 . 109.2    no
H301 . C30 . H302 . 108.8    no
C30 . C31 . C32 . 120.20(12)    yes
C30 . C31 . C36 . 121.04(12)    yes
C32 . C31 . C36 . 118.74(12)    yes
C31 . C32 . C33 . 120.99(13)    yes
C31 . C32 . H321 . 121.1    no
C33 . C32 . H321 . 117.9    no
C32 . C33 . C34 . 119.73(13)    yes
C32 . C33 . H331 . 118.8    no
C34 . C33 . H331 . 121.4    no
C33 . C34 . C35 . 119.85(13)    yes
C33 . C34 . H341 . 119.2    no
C35 . C34 . H341 . 120.9    no
C34 . C35 . C36 . 120.31(14)    yes
C34 . C35 . H351 . 120.3    no
C36 . C35 . H351 . 119.3    no
C31 . C36 . C35 . 120.35(13)    yes
C31 . C36 . H361 . 116.1    no
C35 . C36 . H361 . 123.5    no
C21 . C37 . C38 . 123.91(12)    yes
C21 . C37 . C42 . 118.34(13)    yes
C38 . C37 . C42 . 117.68(13)    yes
C37 . C38 . C39 . 121.19(13)    yes
C37 . C38 . H381 . 119.6    no
C39 . C38 . H381 . 119.2    no
C38 . C39 . C40 . 120.22(14)    yes
C38 . C39 . H391 . 121.1    no
C40 . C39 . H391 . 118.6    no
C39 . C40 . C41 . 119.33(14)    yes
C39 . C40 . H401 . 121.7    no
C41 . C40 . H401 . 119.0    no
C40 . C41 . C42 . 120.31(14)    yes
C40 . C41 . H411 . 120.4    no
C42 . C41 . H411 . 119.3    no
C37 . C42 . C41 . 121.26(14)    yes
C37 . C42 . H421 . 117.4    no
C41 . C42 . H421 . 121.4    no
loop_
 _geom_hbond_atom_site_label_D
 _geom_hbond_site_symmetry_D
 _geom_hbond_atom_site_label_H
 _geom_hbond_site_symmetry_H
 _geom_hbond_atom_site_label_A
 _geom_hbond_site_symmetry_A
 _geom_hbond_angle_DHA
 _geom_hbond_distance_DH
 _geom_hbond_distance_HA
 _geom_hbond_distance_DA
 _geom_hbond_publ_flag
C36 . H361 . O1 . 164 0.91 2.57 3.454(2)    yes

#==============================================================================
data_45 
_ccdc_journal_depnumber            '852574'
#==============================================================================

_cell_length_a                    17.6291(3)
_cell_length_b                    11.7882(2)
_cell_length_c                    18.3855(4)
_cell_angle_alpha                 90
_cell_angle_beta                  116.6367(9)
_cell_angle_gamma                 90
_cell_volume                      3415.28(11)
 
_symmetry_cell_setting            'Monoclinic' 
_symmetry_space_group_name_H-M    'P 1 21/n 1' 
_symmetry_space_group_name_Hall   '-P 2yn' 
loop_
 _symmetry_equiv_pos_as_xyz
 'x,y,z'
 '-x,-y,-z'
 '-x+1/2,y+1/2,-z+1/2'
 'x+1/2,-y+1/2,z+1/2'

loop_
_atom_type_symbol
_atom_type_scat_dispersion_real
_atom_type_scat_dispersion_imag
_atom_type_scat_Cromer_Mann_a1
_atom_type_scat_Cromer_Mann_b1
_atom_type_scat_Cromer_Mann_a2
_atom_type_scat_Cromer_Mann_b2
_atom_type_scat_Cromer_Mann_a3
_atom_type_scat_Cromer_Mann_b3
_atom_type_scat_Cromer_Mann_a4
_atom_type_scat_Cromer_Mann_b4
_atom_type_scat_Cromer_Mann_c
_atom_type_scat_source  
 C       0.0033   0.0016   2.3100  20.8439   1.0200  10.2075   1.5886   0.5687
   0.8650  51.6512   0.2156 'International Tables Vol C 4.2.6.8 and 6.1.1.4'
 H       0.0000   0.0000   0.4930  10.5109   0.3229  26.1257   0.1402   3.1424
   0.0408  57.7998   0.0030 'International Tables Vol C 4.2.6.8 and 6.1.1.4'
 N       0.0061   0.0033  12.2126   0.0057   3.1322   9.8933   2.0125  28.9975
   1.1663   0.5826 -11.5290 'International Tables Vol C 4.2.6.8 and 6.1.1.4'
 O       0.0106   0.0060   3.0485  13.2771   2.2868   5.7011   1.5463   0.3239
   0.8670  32.9089   0.2508 'International Tables Vol C 4.2.6.8 and 6.1.1.4'
 
_cell_formula_units_Z                    4

# Given Formula = C39 H47 N2 O2 
# Dc =      1.12 Fooo =   1248.00 Mu =      0.68 M =    575.81
# Found Formula = C39 H48 N2 O2 
# Dc =      1.12 FOOO =   1248.00 Mu =      0.68 M =    576.82

_chemical_formula_sum             'C39 H48 N2 O2'
_chemical_formula_moiety          'C39 H48 N2 O2'
_chemical_compound_source                .
_chemical_formula_weight            576.82
 
_cell_measurement_reflns_used         7726
_cell_measurement_theta_min              5
_cell_measurement_theta_max             27
_cell_measurement_temperature          150
 
_exptl_crystal_description        'block' 
_exptl_crystal_colour             'colourless' 
_exptl_crystal_size_min           0.280 
_exptl_crystal_size_mid           0.330 
_exptl_crystal_size_max           0.340 
 
_exptl_crystal_density_diffrn     1.122 
_exptl_crystal_density_meas       . 
_exptl_crystal_density_method     'not measured' 
# Non-dispersive F(000): 
_exptl_crystal_F_000              1248 
_exptl_absorpt_coefficient_mu     0.068 
 
# Sheldrick geometric approximatio 0.98 0.98 
# No experimental values of Tmin/max available 
_exptl_absorpt_correction_type    multi-scan 
_exptl_absorpt_process_details    'DENZO/SCALEPACK (Otwinowski & Minor, 1997)' 
_exptl_absorpt_correction_T_min   0.98 
_exptl_absorpt_correction_T_max   0.98 
# For a Kappa CCD, set Tmin to 1.0 and 
# Tmax to the ratio of max:min frame scales in scale_all.log 
_diffrn_measurement_device_type   'Nonius KappaCCD' 
_diffrn_measurement_device        'Area' 
_diffrn_radiation_monochromator   'graphite' 
_diffrn_radiation_type            'Mo K\a'
_diffrn_radiation_wavelength           0.71073
_diffrn_measurement_method        \w 
 
# If a reference occurs more than once, delete the author 
# and date from subsequent references. 
_computing_data_collection        'COLLECT (Nonius, 2001).' 
_computing_cell_refinement        'DENZO/SCALEPACK (Otwinowski & Minor, 1997)' 
_computing_data_reduction         'DENZO/SCALEPACK (Otwinowski & Minor, 1997)' 
_computing_structure_solution     'SIR92 (Altomare et al., 1994)' 
_computing_structure_refinement   'CRYSTALS (Betteridge et al., 2003)' 
_computing_publication_material   'CRYSTALS (Betteridge et al., 2003)' 
_computing_molecular_graphics     'CAMERON (Watkin et al., 1996)' 
 
_diffrn_standards_interval_time   . 
_diffrn_standards_interval_count  . 
_diffrn_standards_number          0 
_diffrn_standards_decay_%         . 
 
_diffrn_ambient_temperature        150
_diffrn_reflns_number             14162 
_reflns_number_total              7759 
_diffrn_reflns_av_R_equivalents   0.032 
# Number of reflections without Friedels Law is 0 
# Number of reflections with Friedels Law is 7759 
# Theoretical number of reflections is about 11626 
 
_diffrn_reflns_theta_min          5.134 
_diffrn_reflns_theta_max          27.505 
_diffrn_measured_fraction_theta_max 0.989 
 
_diffrn_reflns_theta_full         26.680 
_diffrn_measured_fraction_theta_full 0.990 
 
_diffrn_reflns_limit_h_min        -22 
_diffrn_reflns_limit_h_max        22 
_diffrn_reflns_limit_k_min        -14 
_diffrn_reflns_limit_k_max        15 
_diffrn_reflns_limit_l_min        -23 
_diffrn_reflns_limit_l_max        23 
_reflns_limit_h_min               -22 
_reflns_limit_h_max               20 
_reflns_limit_k_min               0 
_reflns_limit_k_max               15 
_reflns_limit_l_min               0 
_reflns_limit_l_max               23 
 
_oxford_diffrn_Wilson_B_factor    3.11 
_oxford_diffrn_Wilson_scale       3.50 
 
_atom_sites_solution_primary      direct #heavy,direct,difmap,geom
# _atom_sites_solution_secondary  difmap
_atom_sites_solution_hydrogens    geom
 
_refine_diff_density_min          -0.26 
_refine_diff_density_max          0.35 
 
# The current dictionary definitions do not cover the 
# situation where the reflections used for refinement were 
# selected by a user-defined sigma threshold 
 
# The values actually used during refinement 
_oxford_reflns_threshold_expression_ref     I>-3.0\s(I)
_refine_ls_number_reflns          5755 
_refine_ls_number_restraints      0 
_refine_ls_number_parameters      388 
_oxford_refine_ls_R_factor_ref    0.0722 
_refine_ls_wR_factor_ref          0.1378 
_refine_ls_goodness_of_fit_ref    0.9928 
_refine_ls_shift/su_max           0.0004761 
_refine_ls_shift/su_mean          0.0000351 
 
# The values computed from all data 
_oxford_reflns_number_all         5757 
_refine_ls_R_factor_all           0.0723 
_refine_ls_wR_factor_all          0.1380 
 
# The values computed with a 2 sigma cutoff - a la SHELX 
_reflns_threshold_expression      I>2.0\s(I)
_reflns_number_gt                 4507 
_refine_ls_R_factor_gt            0.0534 
_refine_ls_wR_factor_gt           0.1252 
 
# choose from: rm (reference molecule of known chirality), 
# ad (anomolous dispersion - Flack), rmad (rm and ad), 
# syn (from synthesis), unk (unknown) or . (not applicable). 
_chemical_absolute_configuration  '.' 
 
_refine_ls_structure_factor_coef  Fsqd 
_refine_ls_matrix_type            full
_refine_ls_hydrogen_treatment     none           # none, undef, noref, refall,
                                                 # refxyz, refU, constr or mixed
_refine_ls_weighting_scheme       calc 
_refine_ls_weighting_details 
;
 Method= Modified Sheldrick 
 w=1/[\s^2^(F^2^) + ( 0.06P)^2^ + 2.20P] 
 ,where P=(max(Fo^2^,0) + 2Fc^2^)/3 
;
# Insert your own references if required - in alphabetical order 
_publ_section_references 
; 
Altomare, A., Cascarano, G., Giacovazzo, C., Guagliardi, A., Burla, M.C., 
Polidori, G. & Camalli, M. (1994). J. Appl. Cryst. 27, 435. 
 
Betteridge, P.W., Carruthers, J.R., Cooper, R.I., 
Prout, K. & Watkin, D.J. (2003). J. Appl. Cryst. 36, 1487. 
 
Nonius (2001). COLLECT. Nonius BV, Delft, The Netherlands. 
 
Otwinowski, Z. & Minor, W. (1997). Methods in Enzymology, Vol. 276, 
edited by C. W. Carter Jr & R. M. Sweet, pp. 307--326. 
New York: Academic Press. 
 
Watkin, D.J., Prout, C.K. & Pearce, L.J. (1996). CAMERON, Chemical 
Crystallography Laboratory, Oxford, UK. 
; 

# Uequiv = arithmetic mean of Ui i.e. Ueqiv = (U1+U2+U3)/3

# Replace last . with number of unfound hydrogen atomsattached to an atom.

# ..._refinement_flags_... 
# . no refinement constraints           S special position constraint on site
# G rigid group refinement of site      R riding atom
# D distance or angle restraint on site T thermal displacement constraints
# U Uiso or Uij restraint (rigid bond)  P partial occupancy constraint

loop_
_atom_site_label
_atom_site_type_symbol
_atom_site_fract_x
_atom_site_fract_y
_atom_site_fract_z
_atom_site_U_iso_or_equiv
_atom_site_occupancy
_atom_site_adp_type
_atom_site_refinement_flags_posn
_atom_site_refinement_flags_adp
_atom_site_refinement_flags_occupancy
_atom_site_disorder_assembly
_atom_site_disorder_group
_oxford_atom_site_special_shape
_atom_site_attached_hydrogens
O1 O 0.58976(9) 1.14254(12) 0.76435(9) 0.0444 1.0000 Uani . . . . . . . 
C2 C 0.57919(12) 1.03238(17) 0.74577(11) 0.0355 1.0000 Uani . . . . . . . 
O3 O 0.60880(11) 0.98355(14) 0.70692(10) 0.0562 1.0000 Uani . . . . . . . 
C4 C 0.52689(12) 0.97810(16) 0.78232(12) 0.0323 1.0000 Uani . . . . . . . 
C5 C 0.51763(12) 0.84844(16) 0.76998(12) 0.0338 1.0000 Uani . . . . . . . 
N6 N 0.51440(10) 0.78500(13) 0.83852(9) 0.0324 1.0000 Uani . . . . . . . 
C7 C 0.59778(12) 0.73986(17) 0.89927(12) 0.0371 1.0000 Uani . . . . . . . 
C8 C 0.66723(12) 0.83011(16) 0.93434(11) 0.0345 1.0000 Uani . . . . . . . 
C9 C 0.72261(13) 0.85285(18) 0.90165(13) 0.0428 1.0000 Uani . . . . . . . 
C10 C 0.78300(14) 0.93840(19) 0.93313(15) 0.0506 1.0000 Uani . . . . . . . 
C11 C 0.78824(15) 1.0028(2) 0.99760(16) 0.0559 1.0000 Uani . . . . . . . 
C12 C 0.73402(15) 0.9814(2) 1.03105(14) 0.0558 1.0000 Uani . . . . . . . 
C13 C 0.67433(14) 0.89496(19) 1.00019(12) 0.0455 1.0000 Uani . . . . . . . 
C14 C 0.62244(14) 0.63743(18) 0.86408(14) 0.0466 1.0000 Uani . . . . . . . 
C15 C 0.46875(12) 0.84561(17) 0.87692(12) 0.0354 1.0000 Uani . . . . . . . 
C16 C 0.44168(12) 0.76985(17) 0.92763(12) 0.0355 1.0000 Uani . . . . . . . 
C17 C 0.43035(13) 0.65432(18) 0.91559(13) 0.0432 1.0000 Uani . . . . . . . 
C18 C 0.40280(14) 0.5898(2) 0.96193(14) 0.0500 1.0000 Uani . . . . . . . 
C19 C 0.38558(14) 0.6398(2) 1.02033(14) 0.0508 1.0000 Uani . . . . . . . 
C20 C 0.39700(15) 0.7552(2) 1.03401(15) 0.0529 1.0000 Uani . . . . . . . 
C21 C 0.42567(14) 0.8196(2) 0.98804(14) 0.0459 1.0000 Uani . . . . . . . 
C22 C 0.44569(12) 0.82003(17) 0.68535(12) 0.0361 1.0000 Uani . . . . . . . 
N23 N 0.36072(10) 0.85327(13) 0.67580(9) 0.0327 1.0000 Uani . . . . . . . 
C24 C 0.30506(13) 0.88314(18) 0.59002(12) 0.0391 1.0000 Uani . . . . . . . 
C25 C 0.33082(12) 0.99049(18) 0.56249(11) 0.0363 1.0000 Uani . . . . . . . 
C26 C 0.33067(14) 1.09399(18) 0.59807(13) 0.0422 1.0000 Uani . . . . . . . 
C27 C 0.35073(15) 1.19300(19) 0.57043(14) 0.0489 1.0000 Uani . . . . . . . 
C28 C 0.37130(15) 1.1897(2) 0.50624(14) 0.0503 1.0000 Uani . . . . . . . 
C29 C 0.37149(16) 1.0877(2) 0.46969(15) 0.0552 1.0000 Uani . . . . . . . 
C30 C 0.35124(14) 0.9887(2) 0.49777(13) 0.0471 1.0000 Uani . . . . . . . 
C31 C 0.31834(12) 0.76393(17) 0.70021(12) 0.0362 1.0000 Uani . . . . . . . 
C32 C 0.24351(12) 0.80594(17) 0.71162(11) 0.0350 1.0000 Uani . . . . . . . 
C33 C 0.23841(13) 0.91557(18) 0.73655(12) 0.0401 1.0000 Uani . . . . . . . 
C34 C 0.16987(15) 0.9503(2) 0.74831(14) 0.0483 1.0000 Uani . . . . . . . 
C35 C 0.10514(15) 0.8771(2) 0.73562(15) 0.0533 1.0000 Uani . . . . . . . 
C36 C 0.10806(14) 0.7674(2) 0.71044(15) 0.0522 1.0000 Uani . . . . . . . 
C37 C 0.17604(13) 0.73189(19) 0.69807(14) 0.0437 1.0000 Uani . . . . . . . 
C38 C 0.45142(14) 0.69736(19) 0.65918(14) 0.0453 1.0000 Uani . . . . . . . 
C39 C 0.51750(16) 0.6835(2) 0.62751(17) 0.0621 1.0000 Uani . . . . . . . 
C40 C 0.63955(15) 1.21647(19) 0.73662(15) 0.0475 1.0000 Uani . . . . . . . 
C41 C 0.59744(19) 1.2215(3) 0.64546(17) 0.0782 1.0000 Uani . . . . . . . 
C42 C 0.72971(16) 1.1745(3) 0.77052(19) 0.0768 1.0000 Uani . . . . . . . 
C43 C 0.6377(3) 1.3294(2) 0.7744(3) 0.1076 1.0000 Uani . . . . . . . 
H42 H 0.5559 0.9993 0.8409 0.0314 1.0000 Uiso R . . . . . . 
H41 H 0.4730 1.0101 0.7569 0.0315 1.0000 Uiso R . . . . . . 
H51 H 0.5703 0.8204 0.7682 0.0338 1.0000 Uiso R . . . . . . 
H71 H 0.5886 0.7109 0.9465 0.0368 1.0000 Uiso R . . . . . . 
H91 H 0.7200 0.8083 0.8573 0.0437 1.0000 Uiso R . . . . . . 
H101 H 0.8190 0.9509 0.9098 0.0549 1.0000 Uiso R . . . . . . 
H111 H 0.8288 1.0617 1.0199 0.0612 1.0000 Uiso R . . . . . . 
H121 H 0.7371 1.0247 1.0745 0.0567 1.0000 Uiso R . . . . . . 
H131 H 0.6364 0.8791 1.0229 0.0463 1.0000 Uiso R . . . . . . 
H143 H 0.6775 0.6085 0.9019 0.0599 1.0000 Uiso R . . . . . . 
H142 H 0.6255 0.6581 0.8147 0.0602 1.0000 Uiso R . . . . . . 
H141 H 0.5792 0.5790 0.8508 0.0605 1.0000 Uiso R . . . . . . 
H152 H 0.5066 0.9077 0.9122 0.0362 1.0000 Uiso R . . . . . . 
H151 H 0.4210 0.8809 0.8325 0.0365 1.0000 Uiso R . . . . . . 
H171 H 0.4446 0.6185 0.8767 0.0470 1.0000 Uiso R . . . . . . 
H181 H 0.3953 0.5103 0.9530 0.0525 1.0000 Uiso R . . . . . . 
H191 H 0.3626 0.5972 1.0506 0.0530 1.0000 Uiso R . . . . . . 
H201 H 0.3851 0.7903 1.0743 0.0550 1.0000 Uiso R . . . . . . 
H211 H 0.4379 0.8986 1.0005 0.0474 1.0000 Uiso R . . . . . . 
H221 H 0.4564 0.8695 0.6476 0.0350 1.0000 Uiso R . . . . . . 
H241 H 0.2483 0.8959 0.5852 0.0406 1.0000 Uiso R . . . . . . 
H242 H 0.3012 0.8204 0.5539 0.0421 1.0000 Uiso R . . . . . . 
H261 H 0.3171 1.0962 0.6413 0.0452 1.0000 Uiso R . . . . . . 
H271 H 0.3528 1.2649 0.5942 0.0527 1.0000 Uiso R . . . . . . 
H281 H 0.3853 1.2567 0.4886 0.0517 1.0000 Uiso R . . . . . . 
H291 H 0.3841 1.0862 0.4262 0.0567 1.0000 Uiso R . . . . . . 
H301 H 0.3499 0.9188 0.4720 0.0530 1.0000 Uiso R . . . . . . 
H312 H 0.3590 0.7308 0.7515 0.0374 1.0000 Uiso R . . . . . . 
H311 H 0.2966 0.7009 0.6598 0.0383 1.0000 Uiso R . . . . . . 
H331 H 0.2853 0.9672 0.7451 0.0414 1.0000 Uiso R . . . . . . 
H341 H 0.1677 1.0261 0.7658 0.0523 1.0000 Uiso R . . . . . . 
H351 H 0.0597 0.9010 0.7445 0.0554 1.0000 Uiso R . . . . . . 
H361 H 0.0625 0.7181 0.7006 0.0542 1.0000 Uiso R . . . . . . 
H371 H 0.1770 0.6564 0.6795 0.0451 1.0000 Uiso R . . . . . . 
H382 H 0.4662 0.6480 0.7071 0.0465 1.0000 Uiso R . . . . . . 
H381 H 0.3953 0.6750 0.6154 0.0468 1.0000 Uiso R . . . . . . 
H393 H 0.5152 0.6079 0.6075 0.0797 1.0000 Uiso R . . . . . . 
H392 H 0.5735 0.6970 0.6685 0.0790 1.0000 Uiso R . . . . . . 
H391 H 0.5077 0.7338 0.5834 0.0795 1.0000 Uiso R . . . . . . 
H413 H 0.6299 1.2702 0.6267 0.1050 1.0000 Uiso R . . . . . . 
H412 H 0.5409 1.2496 0.6255 0.1052 1.0000 Uiso R . . . . . . 
H411 H 0.5942 1.1465 0.6236 0.1048 1.0000 Uiso R . . . . . . 
H423 H 0.7644 1.2262 0.7599 0.1064 1.0000 Uiso R . . . . . . 
H422 H 0.7534 1.1630 0.8284 0.1071 1.0000 Uiso R . . . . . . 
H421 H 0.7296 1.1017 0.7452 0.1075 1.0000 Uiso R . . . . . . 
H433 H 0.6680 1.3841 0.7584 0.1484 1.0000 Uiso R . . . . . . 
H432 H 0.6650 1.3241 0.8330 0.1492 1.0000 Uiso R . . . . . . 
H431 H 0.5805 1.3558 0.7571 0.1488 1.0000 Uiso R . . . . . . 
loop_
_atom_site_aniso_label
_atom_site_aniso_U_11
_atom_site_aniso_U_22
_atom_site_aniso_U_33
_atom_site_aniso_U_23
_atom_site_aniso_U_13
_atom_site_aniso_U_12
O1 0.0551(9) 0.0365(8) 0.0585(9) -0.0028(7) 0.0403(8) -0.0094(7) 
C2 0.0363(10) 0.0381(11) 0.0321(10) -0.0023(9) 0.0154(9) -0.0032(9) 
O3 0.0756(11) 0.0507(10) 0.0667(11) -0.0140(8) 0.0537(10) -0.0122(8) 
C4 0.0301(10) 0.0332(10) 0.0340(10) -0.0015(8) 0.0147(8) -0.0029(8) 
C5 0.0309(10) 0.0358(11) 0.0367(10) -0.0027(9) 0.0169(8) -0.0023(8) 
N6 0.0306(8) 0.0337(9) 0.0342(8) 0.0007(7) 0.0155(7) 0.0010(7) 
C7 0.0354(10) 0.0352(11) 0.0387(11) 0.0025(9) 0.0149(9) 0.0042(9) 
C8 0.0308(10) 0.0336(11) 0.0317(10) 0.0001(8) 0.0074(8) 0.0085(8) 
C9 0.0382(11) 0.0426(12) 0.0455(12) -0.0095(10) 0.0168(10) 0.0002(9) 
C10 0.0418(12) 0.0436(13) 0.0622(15) -0.0030(11) 0.0195(11) -0.0029(10) 
C11 0.0468(13) 0.0369(13) 0.0641(15) -0.0097(11) 0.0072(12) -0.0007(10) 
C12 0.0531(14) 0.0515(14) 0.0424(13) -0.0159(11) 0.0032(11) 0.0128(12) 
C13 0.0412(12) 0.0528(14) 0.0331(11) -0.0009(10) 0.0085(9) 0.0129(10) 
C14 0.0433(12) 0.0327(11) 0.0558(14) -0.0006(10) 0.0151(10) 0.0041(9) 
C15 0.0344(10) 0.0339(11) 0.0366(10) 0.0015(8) 0.0146(9) 0.0016(8) 
C16 0.0268(9) 0.0417(12) 0.0353(10) 0.0067(9) 0.0116(8) 0.0015(8) 
C17 0.0432(12) 0.0420(12) 0.0446(12) 0.0020(10) 0.0198(10) 0.0000(10) 
C18 0.0445(12) 0.0431(13) 0.0569(14) 0.0078(11) 0.0178(11) -0.0054(10) 
C19 0.0469(13) 0.0591(15) 0.0504(14) 0.0136(11) 0.0253(11) -0.0061(11) 
C20 0.0574(14) 0.0600(16) 0.0526(14) 0.0003(12) 0.0348(12) -0.0059(12) 
C21 0.0470(12) 0.0424(12) 0.0513(13) 0.0010(10) 0.0248(11) -0.0029(10) 
C22 0.0338(10) 0.0397(11) 0.0364(11) -0.0010(9) 0.0172(9) -0.0015(9) 
N23 0.0323(8) 0.0327(9) 0.0323(8) 0.0010(7) 0.0138(7) -0.0025(7) 
C24 0.0389(11) 0.0414(12) 0.0323(10) -0.0005(9) 0.0119(9) -0.0041(9) 
C25 0.0332(10) 0.0432(12) 0.0282(10) 0.0028(8) 0.0099(8) -0.0005(9) 
C26 0.0472(12) 0.0443(13) 0.0375(11) 0.0055(9) 0.0211(10) 0.0056(10) 
C27 0.0618(14) 0.0398(12) 0.0453(13) 0.0053(10) 0.0242(11) 0.0035(11) 
C28 0.0582(14) 0.0480(14) 0.0464(13) 0.0131(11) 0.0250(11) -0.0009(11) 
C29 0.0659(15) 0.0651(16) 0.0444(13) 0.0068(12) 0.0334(12) -0.0022(13) 
C30 0.0534(13) 0.0503(14) 0.0404(12) -0.0031(10) 0.0235(10) -0.0020(11) 
C31 0.0354(10) 0.0326(11) 0.0376(11) -0.0008(8) 0.0138(9) -0.0033(8) 
C32 0.0325(10) 0.0401(12) 0.0306(10) 0.0086(8) 0.0126(8) 0.0025(9) 
C33 0.0395(11) 0.0364(11) 0.0398(11) 0.0002(9) 0.0136(9) -0.0053(9) 
C34 0.0538(14) 0.0451(13) 0.0483(13) 0.0032(10) 0.0251(11) 0.0092(11) 
C35 0.0520(14) 0.0561(15) 0.0634(15) 0.0126(12) 0.0361(12) 0.0114(12) 
C36 0.0396(12) 0.0548(15) 0.0666(15) 0.0083(12) 0.0278(12) -0.0073(11) 
C37 0.0435(12) 0.0374(12) 0.0520(13) 0.0029(10) 0.0231(10) -0.0044(9) 
C38 0.0417(12) 0.0466(13) 0.0461(12) -0.0113(10) 0.0184(10) -0.0021(10) 
C39 0.0583(15) 0.0679(17) 0.0702(17) -0.0231(14) 0.0379(14) -0.0023(13) 
C40 0.0533(13) 0.0445(13) 0.0595(14) 0.0021(11) 0.0385(12) -0.0118(10) 
C41 0.0718(18) 0.096(2) 0.0607(17) 0.0260(16) 0.0239(14) -0.0254(16) 
C42 0.0486(15) 0.096(2) 0.082(2) 0.0238(17) 0.0258(14) -0.0186(15) 
C43 0.165(4) 0.0486(17) 0.181(4) -0.022(2) 0.142(4) -0.037(2) 

_refine_ls_extinction_method 
    'None'
_oxford_refine_ls_scale 0.5762(13) 
loop_
 _geom_bond_atom_site_label_1
 _geom_bond_site_symmetry_1
 _geom_bond_atom_site_label_2
 _geom_bond_site_symmetry_2
 _geom_bond_distance
 _geom_bond_publ_flag
O1 . C2 . 1.334(2)    yes
O1 . C40 . 1.480(2)    yes
C2 . O3 . 1.204(2)    yes
C2 . C4 . 1.505(3)    yes
C4 . C5 . 1.543(3)    yes
C4 . H42 . 0.995    no
C4 . H41 . 0.931    no
C5 . N6 . 1.488(2)    yes
C5 . C22 . 1.540(3)    yes
C5 . H51 . 1.001    no
N6 . C7 . 1.490(2)    yes
N6 . C15 . 1.472(2)    yes
C7 . C8 . 1.529(3)    yes
C7 . C14 . 1.522(3)    yes
C7 . H71 . 1.011    no
C8 . C9 . 1.383(3)    yes
C8 . C13 . 1.389(3)    yes
C9 . C10 . 1.390(3)    yes
C9 . H91 . 0.953    no
C10 . C11 . 1.376(3)    yes
C10 . H101 . 0.923    no
C11 . C12 . 1.372(4)    yes
C11 . H111 . 0.948    no
C12 . C13 . 1.390(3)    yes
C12 . H121 . 0.930    no
C13 . H131 . 0.951    no
C14 . H143 . 0.968    no
C14 . H142 . 0.964    no
C14 . H141 . 0.974    no
C15 . C16 . 1.514(3)    yes
C15 . H152 . 1.006    no
C15 . H151 . 0.965    no
C16 . C17 . 1.380(3)    yes
C16 . C21 . 1.392(3)    yes
C17 . C18 . 1.383(3)    yes
C17 . H171 . 0.956    no
C18 . C19 . 1.373(3)    yes
C18 . H181 . 0.950    no
C19 . C20 . 1.381(3)    yes
C19 . H191 . 0.963    no
C20 . C21 . 1.389(3)    yes
C20 . H201 . 0.950    no
C21 . H211 . 0.960    no
C22 . N23 . 1.481(2)    yes
C22 . C38 . 1.542(3)    yes
C22 . H221 . 0.987    no
N23 . C24 . 1.479(2)    yes
N23 . C31 . 1.473(2)    yes
C24 . C25 . 1.507(3)    yes
C24 . H241 . 0.976    no
C24 . H242 . 0.975    no
C25 . C26 . 1.385(3)    yes
C25 . C30 . 1.389(3)    yes
C26 . C27 . 1.381(3)    yes
C26 . H261 . 0.927    no
C27 . C28 . 1.382(3)    yes
C27 . H271 . 0.947    no
C28 . C29 . 1.378(3)    yes
C28 . H281 . 0.928    no
C29 . C30 . 1.386(3)    yes
C29 . H291 . 0.920    no
C30 . H301 . 0.945    no
C31 . C32 . 1.509(3)    yes
C31 . H312 . 0.975    no
C31 . H311 . 0.997    no
C32 . C33 . 1.388(3)    yes
C32 . C37 . 1.405(3)    yes
C33 . C34 . 1.381(3)    yes
C33 . H331 . 0.981    no
C34 . C35 . 1.365(3)    yes
C34 . H341 . 0.956    no
C35 . C36 . 1.382(3)    yes
C35 . H351 . 0.930    no
C36 . C37 . 1.381(3)    yes
C36 . H361 . 0.940    no
C37 . H371 . 0.956    no
C38 . C39 . 1.527(3)    yes
C38 . H382 . 0.989    no
C38 . H381 . 0.991    no
C39 . H393 . 0.958    no
C39 . H392 . 0.949    no
C39 . H391 . 0.957    no
C40 . C41 . 1.499(4)    yes
C40 . C42 . 1.507(4)    yes
C40 . C43 . 1.509(4)    yes
C41 . H413 . 0.975    no
C41 . H412 . 0.954    no
C41 . H411 . 0.962    no
C42 . H423 . 0.943    no
C42 . H422 . 0.962    no
C42 . H421 . 0.976    no
C43 . H433 . 0.964    no
C43 . H432 . 0.964    no
C43 . H431 . 0.964    no
loop_
 _geom_angle_atom_site_label_1
 _geom_angle_site_symmetry_1
 _geom_angle_atom_site_label_2
 _geom_angle_site_symmetry_2
 _geom_angle_atom_site_label_3
 _geom_angle_site_symmetry_3
 _geom_angle
 _geom_angle_publ_flag
C2 . O1 . C40 . 121.41(16)    yes
O1 . C2 . O3 . 124.71(18)    yes
O1 . C2 . C4 . 110.03(16)    yes
O3 . C2 . C4 . 125.24(19)    yes
C2 . C4 . C5 . 113.64(16)    yes
C2 . C4 . H42 . 104.8    no
C5 . C4 . H42 . 112.2    no
C2 . C4 . H41 . 107.2    no
C5 . C4 . H41 . 108.1    no
H42 . C4 . H41 . 110.9    no
C4 . C5 . N6 . 114.51(15)    yes
C4 . C5 . C22 . 110.42(16)    yes
N6 . C5 . C22 . 114.80(15)    yes
C4 . C5 . H51 . 107.1    no
N6 . C5 . H51 . 104.5    no
C22 . C5 . H51 . 104.5    no
C5 . N6 . C7 . 114.50(15)    yes
C5 . N6 . C15 . 113.52(15)    yes
C7 . N6 . C15 . 112.44(15)    yes
N6 . C7 . C8 . 113.70(16)    yes
N6 . C7 . C14 . 109.79(16)    yes
C8 . C7 . C14 . 113.82(16)    yes
N6 . C7 . H71 . 106.3    no
C8 . C7 . H71 . 106.2    no
C14 . C7 . H71 . 106.4    no
C7 . C8 . C9 . 122.63(18)    yes
C7 . C8 . C13 . 119.52(19)    yes
C9 . C8 . C13 . 117.8(2)    yes
C8 . C9 . C10 . 121.2(2)    yes
C8 . C9 . H91 . 119.4    no
C10 . C9 . H91 . 119.4    no
C9 . C10 . C11 . 120.2(2)    yes
C9 . C10 . H101 . 118.7    no
C11 . C10 . H101 . 121.1    no
C10 . C11 . C12 . 119.5(2)    yes
C10 . C11 . H111 . 121.6    no
C12 . C11 . H111 . 118.9    no
C11 . C12 . C13 . 120.3(2)    yes
C11 . C12 . H121 . 120.0    no
C13 . C12 . H121 . 119.7    no
C12 . C13 . C8 . 121.0(2)    yes
C12 . C13 . H131 . 121.1    no
C8 . C13 . H131 . 117.8    no
C7 . C14 . H143 . 111.1    no
C7 . C14 . H142 . 110.3    no
H143 . C14 . H142 . 107.8    no
C7 . C14 . H141 . 109.0    no
H143 . C14 . H141 . 110.6    no
H142 . C14 . H141 . 108.1    no
N6 . C15 . C16 . 113.58(16)    yes
N6 . C15 . H152 . 108.4    no
C16 . C15 . H152 . 109.5    no
N6 . C15 . H151 . 105.1    no
C16 . C15 . H151 . 112.3    no
H152 . C15 . H151 . 107.8    no
C15 . C16 . C17 . 123.11(19)    yes
C15 . C16 . C21 . 118.38(18)    yes
C17 . C16 . C21 . 118.50(19)    yes
C16 . C17 . C18 . 120.7(2)    yes
C16 . C17 . H171 . 119.2    no
C18 . C17 . H171 . 120.1    no
C17 . C18 . C19 . 120.5(2)    yes
C17 . C18 . H181 . 119.7    no
C19 . C18 . H181 . 119.8    no
C18 . C19 . C20 . 120.0(2)    yes
C18 . C19 . H191 . 121.7    no
C20 . C19 . H191 . 118.2    no
C19 . C20 . C21 . 119.4(2)    yes
C19 . C20 . H201 . 120.4    no
C21 . C20 . H201 . 120.2    no
C16 . C21 . C20 . 121.0(2)    yes
C16 . C21 . H211 . 119.7    no
C20 . C21 . H211 . 119.3    no
C5 . C22 . N23 . 113.17(15)    yes
C5 . C22 . C38 . 112.32(17)    yes
N23 . C22 . C38 . 114.56(16)    yes
C5 . C22 . H221 . 104.6    no
N23 . C22 . H221 . 105.2    no
C38 . C22 . H221 . 105.9    no
C22 . N23 . C24 . 109.98(15)    yes
C22 . N23 . C31 . 113.52(15)    yes
C24 . N23 . C31 . 108.10(15)    yes
N23 . C24 . C25 . 113.74(16)    yes
N23 . C24 . H241 . 107.3    no
C25 . C24 . H241 . 106.9    no
N23 . C24 . H242 . 110.8    no
C25 . C24 . H242 . 110.3    no
H241 . C24 . H242 . 107.4    no
C24 . C25 . C26 . 121.10(18)    yes
C24 . C25 . C30 . 120.52(19)    yes
C26 . C25 . C30 . 118.30(19)    yes
C25 . C26 . C27 . 121.0(2)    yes
C25 . C26 . H261 . 119.1    no
C27 . C26 . H261 . 119.9    no
C26 . C27 . C28 . 119.9(2)    yes
C26 . C27 . H271 . 123.4    no
C28 . C27 . H271 . 116.7    no
C27 . C28 . C29 . 120.0(2)    yes
C27 . C28 . H281 . 119.1    no
C29 . C28 . H281 . 120.9    no
C28 . C29 . C30 . 119.7(2)    yes
C28 . C29 . H291 . 119.6    no
C30 . C29 . H291 . 120.7    no
C25 . C30 . C29 . 121.0(2)    yes
C25 . C30 . H301 . 119.0    no
C29 . C30 . H301 . 119.9    no
N23 . C31 . C32 . 113.71(16)    yes
N23 . C31 . H312 . 109.1    no
C32 . C31 . H312 . 107.9    no
N23 . C31 . H311 . 112.6    no
C32 . C31 . H311 . 106.3    no
H312 . C31 . H311 . 107.0    no
C31 . C32 . C33 . 122.80(18)    yes
C31 . C32 . C37 . 119.66(18)    yes
C33 . C32 . C37 . 117.53(19)    yes
C32 . C33 . C34 . 121.2(2)    yes
C32 . C33 . H331 . 117.2    no
C34 . C33 . H331 . 121.6    no
C33 . C34 . C35 . 120.6(2)    yes
C33 . C34 . H341 . 119.9    no
C35 . C34 . H341 . 119.5    no
C34 . C35 . C36 . 119.7(2)    yes
C34 . C35 . H351 . 119.8    no
C36 . C35 . H351 . 120.5    no
C35 . C36 . C37 . 120.3(2)    yes
C35 . C36 . H361 . 119.1    no
C37 . C36 . H361 . 120.6    no
C32 . C37 . C36 . 120.7(2)    yes
C32 . C37 . H371 . 119.5    no
C36 . C37 . H371 . 119.8    no
C22 . C38 . C39 . 112.80(19)    yes
C22 . C38 . H382 . 107.5    no
C39 . C38 . H382 . 109.7    no
C22 . C38 . H381 . 108.8    no
C39 . C38 . H381 . 108.4    no
H382 . C38 . H381 . 109.6    no
C38 . C39 . H393 . 109.8    no
C38 . C39 . H392 . 112.2    no
H393 . C39 . H392 . 108.1    no
C38 . C39 . H391 . 112.3    no
H393 . C39 . H391 . 106.9    no
H392 . C39 . H391 . 107.3    no
O1 . C40 . C41 . 109.60(19)    yes
O1 . C40 . C42 . 110.04(19)    yes
C41 . C40 . C42 . 112.2(2)    yes
O1 . C40 . C43 . 102.84(18)    yes
C41 . C40 . C43 . 112.2(3)    yes
C42 . C40 . C43 . 109.6(3)    yes
C40 . C41 . H413 . 110.1    no
C40 . C41 . H412 . 110.6    no
H413 . C41 . H412 . 109.6    no
C40 . C41 . H411 . 109.7    no
H413 . C41 . H411 . 109.2    no
H412 . C41 . H411 . 107.6    no
C40 . C42 . H423 . 111.3    no
C40 . C42 . H422 . 111.0    no
H423 . C42 . H422 . 108.6    no
C40 . C42 . H421 . 108.4    no
H423 . C42 . H421 . 109.4    no
H422 . C42 . H421 . 108.0    no
C40 . C43 . H433 . 108.7    no
C40 . C43 . H432 . 110.8    no
H433 . C43 . H432 . 108.4    no
C40 . C43 . H431 . 111.6    no
H433 . C43 . H431 . 108.9    no
H432 . C43 . H431 . 108.3    no
loop_
 _geom_hbond_atom_site_label_D
 _geom_hbond_site_symmetry_D
 _geom_hbond_atom_site_label_H
 _geom_hbond_site_symmetry_H
 _geom_hbond_atom_site_label_A
 _geom_hbond_site_symmetry_A
 _geom_hbond_angle_DHA
 _geom_hbond_distance_DH
 _geom_hbond_distance_HA
 _geom_hbond_distance_DA
 _geom_hbond_publ_flag
C31 . H312 . N6 . 128 0.97 2.56 3.255(3)    yes
C41 . H411 . O3 . 120 0.96 2.40 2.997(3)    yes

#==============================================================================
data_47 
_ccdc_journal_depnumber            '852575'
#==============================================================================

_cell_length_a                    17.7110(6)
_cell_length_b                    12.0009(4)
_cell_length_c                    18.5046(6)
_cell_angle_alpha                 90
_cell_angle_beta                  116.3099(14)
_cell_angle_gamma                 90
_cell_volume                      3525.7(2)
 
_symmetry_cell_setting            'Monoclinic' 
_symmetry_space_group_name_H-M    'P 1 21/n 1' 
_symmetry_space_group_name_Hall   '-P 2yn' 
loop_
 _symmetry_equiv_pos_as_xyz
 'x,y,z'
 '-x,-y,-z'
 '-x+1/2,y+1/2,-z+1/2'
 'x+1/2,-y+1/2,z+1/2'

loop_
_atom_type_symbol
_atom_type_scat_dispersion_real
_atom_type_scat_dispersion_imag
_atom_type_scat_Cromer_Mann_a1
_atom_type_scat_Cromer_Mann_b1
_atom_type_scat_Cromer_Mann_a2
_atom_type_scat_Cromer_Mann_b2
_atom_type_scat_Cromer_Mann_a3
_atom_type_scat_Cromer_Mann_b3
_atom_type_scat_Cromer_Mann_a4
_atom_type_scat_Cromer_Mann_b4
_atom_type_scat_Cromer_Mann_c
_atom_type_scat_source  
 C       0.0033   0.0016   2.3100  20.8439   1.0200  10.2075   1.5886   0.5687
   0.8650  51.6512   0.2156 'International Tables Vol C 4.2.6.8 and 6.1.1.4'
 H       0.0000   0.0000   0.4930  10.5109   0.3229  26.1257   0.1402   3.1424
   0.0408  57.7998   0.0030 'International Tables Vol C 4.2.6.8 and 6.1.1.4'
 N       0.0061   0.0033  12.2126   0.0057   3.1322   9.8933   2.0125  28.9975
   1.1663   0.5826 -11.5290 'International Tables Vol C 4.2.6.8 and 6.1.1.4'
 O       0.0106   0.0060   3.0485  13.2771   2.2868   5.7011   1.5463   0.3239
   0.8670  32.9089   0.2508 'International Tables Vol C 4.2.6.8 and 6.1.1.4'
 
_cell_formula_units_Z                    4

# Given Formula = C39 H52 N2 O2 
# Dc =      1.09 Fooo =   1312.00 Mu =      0.66 M =    580.85
# Found Formula = C41 H52 N2 O2 
# Dc =      1.14 FOOO =   1312.00 Mu =      0.69 M =    604.88

_chemical_formula_sum             'C41 H52 N2 O2'
_chemical_formula_moiety          'C41 H52 N2 O2'
_chemical_compound_source                .
_chemical_formula_weight            604.88
 
_cell_measurement_reflns_used         7041
_cell_measurement_theta_min              5
_cell_measurement_theta_max             27
_cell_measurement_temperature          150
 
_exptl_crystal_description        'block' 
_exptl_crystal_colour             'colourless' 
_exptl_crystal_size_min           0.140 
_exptl_crystal_size_mid           0.240 
_exptl_crystal_size_max           0.260 
 
_exptl_crystal_density_diffrn     1.139 
_exptl_crystal_density_meas       . 
_exptl_crystal_density_method     'not measured' 
# Non-dispersive F(000): 
_exptl_crystal_F_000              1312 
_exptl_absorpt_coefficient_mu     0.069 
 
# Sheldrick geometric approximatio 0.98 0.99 
# No experimental values of Tmin/max available 
_exptl_absorpt_correction_type    multi-scan 
_exptl_absorpt_process_details    'DENZO/SCALEPACK (Otwinowski & Minor, 1997)' 
_exptl_absorpt_correction_T_min   0.98 
_exptl_absorpt_correction_T_max   0.99 
# For a Kappa CCD, set Tmin to 1.0 and 
# Tmax to the ratio of max:min frame scales in scale_all.log 
_diffrn_measurement_device_type   'Nonius KappaCCD' 
_diffrn_measurement_device        'Area' 
_diffrn_radiation_monochromator   'graphite' 
_diffrn_radiation_type            'Mo K\a'
_diffrn_radiation_wavelength           0.71073
_diffrn_measurement_method        \w 
 
# If a reference occurs more than once, delete the author 
# and date from subsequent references. 
_computing_data_collection        'COLLECT (Nonius, 2001).' 
_computing_cell_refinement        'DENZO/SCALEPACK (Otwinowski & Minor, 1997)' 
_computing_data_reduction         'DENZO/SCALEPACK (Otwinowski & Minor, 1997)' 
_computing_structure_solution     'USER DEFINED STRUCTURE SOLUTION' 
_computing_structure_refinement   'CRYSTALS (Betteridge et al., 2003)' 
_computing_publication_material   'CRYSTALS (Betteridge et al., 2003)' 
_computing_molecular_graphics     'CAMERON (Watkin et al., 1996)' 
 
_diffrn_standards_interval_time   . 
_diffrn_standards_interval_count  . 
_diffrn_standards_number          0 
_diffrn_standards_decay_%         . 
 
_diffrn_ambient_temperature        150
_diffrn_reflns_number             13208 
_reflns_number_total              7964 
_diffrn_reflns_av_R_equivalents   0.081 
# Number of reflections without Friedels Law is 0 
# Number of reflections with Friedels Law is 7964 
# Theoretical number of reflections is about 16109 
 
_diffrn_reflns_theta_min          5.107 
_diffrn_reflns_theta_max          27.464 
_diffrn_measured_fraction_theta_max 0.986 
 
_diffrn_reflns_theta_full         26.640 
_diffrn_measured_fraction_theta_full 0.991 
 
_diffrn_reflns_limit_h_min        -22 
_diffrn_reflns_limit_h_max        22 
_diffrn_reflns_limit_k_min        -14 
_diffrn_reflns_limit_k_max        15 
_diffrn_reflns_limit_l_min        -24 
_diffrn_reflns_limit_l_max        23 
_reflns_limit_h_min               -22 
_reflns_limit_h_max               20 
_reflns_limit_k_min               0 
_reflns_limit_k_max               15 
_reflns_limit_l_min               0 
_reflns_limit_l_max               24 
 
_oxford_diffrn_Wilson_B_factor    0.00 
_oxford_diffrn_Wilson_scale       0.00 
 
_atom_sites_solution_primary      direct #heavy,direct,difmap,geom
# _atom_sites_solution_secondary  difmap
_atom_sites_solution_hydrogens    geom
 
_refine_diff_density_min          -0.25 
_refine_diff_density_max          0.29 
 
# The current dictionary definitions do not cover the 
# situation where the reflections used for refinement were 
# selected by a user-defined sigma threshold 
 
# The values actually used during refinement 
_oxford_reflns_threshold_expression_ref     I>2.0\s(I)
_refine_ls_number_reflns          3716 
_refine_ls_number_restraints      0 
_refine_ls_number_parameters      406 
_oxford_refine_ls_R_factor_ref    0.0632 
_refine_ls_wR_factor_ref          0.0627 
_refine_ls_goodness_of_fit_ref    1.1484 
_refine_ls_shift/su_max           0.0002899 
_refine_ls_shift/su_mean          0.0000248 
 
# The values computed from all data 
_oxford_reflns_number_all         7964 
_refine_ls_R_factor_all           0.1713 
_refine_ls_wR_factor_all          0.1171 
 
# The values computed with a 2 sigma cutoff - a la SHELX 
_reflns_threshold_expression      I>2.0\s(I)
_reflns_number_gt                 3716 
_refine_ls_R_factor_gt            0.0632 
_refine_ls_wR_factor_gt           0.0627 
 
# choose from: rm (reference molecule of known chirality), 
# ad (anomolous dispersion - Flack), rmad (rm and ad), 
# syn (from synthesis), unk (unknown) or . (not applicable). 
_chemical_absolute_configuration  '.' 
 
_refine_ls_structure_factor_coef  F 
_refine_ls_matrix_type            full
_refine_ls_hydrogen_treatment     none           # none, undef, noref, refall,
                                                 # refxyz, refU, constr or mixed
_refine_ls_weighting_scheme       calc 
_refine_ls_weighting_details 
;
 Method, part 1, Chebychev polynomial, (Watkin, 1994, Prince, 1982) 
 [weight] = 1.0/[A~0~*T~0~(x)+A~1~*T~1~(x) ... +A~n-1~]*T~n-1~(x)] 
 where A~i~ are the Chebychev coefficients listed below and x= Fcalc/Fmax 
 Method = Robust Weighting (Prince, 1982) 
 W = [weight] * [1-(deltaF/6*sigmaF)^2^]^2^ 
 A~i~ are: 
 1.19 1.14 0.858 
;
# Insert your own references if required - in alphabetical order 
_publ_section_references 
; 
User-defined structure solution reference 
 
Betteridge, P.W., Carruthers, J.R., Cooper, R.I., 
Prout, K. & Watkin, D.J. (2003). J. Appl. Cryst. 36, 1487. 
 
Nonius (2001). COLLECT. Nonius BV, Delft, The Netherlands. 
 
Otwinowski, Z. & Minor, W. (1997). Methods in Enzymology, Vol. 276, 
edited by C. W. Carter Jr & R. M. Sweet, pp. 307--326. 
New York: Academic Press. 
 
Prince, E. 
Mathematical Techniques in Crystallography 
and Materials Science 
Springer-Verlag, New York, 1982. 
 
Watkin D.J. (1994). 
Acta Cryst, A50, 411-437. 
 
Watkin, D.J., Prout, C.K. & Pearce, L.J. (1996). CAMERON, Chemical 
Crystallography Laboratory, Oxford, UK. 
; 

# Uequiv = arithmetic mean of Ui i.e. Ueqiv = (U1+U2+U3)/3

# Replace last . with number of unfound hydrogen atomsattached to an atom.

# ..._refinement_flags_... 
# . no refinement constraints           S special position constraint on site
# G rigid group refinement of site      R riding atom
# D distance or angle restraint on site T thermal displacement constraints
# U Uiso or Uij restraint (rigid bond)  P partial occupancy constraint

loop_
_atom_site_label
_atom_site_type_symbol
_atom_site_fract_x
_atom_site_fract_y
_atom_site_fract_z
_atom_site_U_iso_or_equiv
_atom_site_occupancy
_atom_site_adp_type
_atom_site_refinement_flags_posn
_atom_site_refinement_flags_adp
_atom_site_refinement_flags_occupancy
_atom_site_disorder_assembly
_atom_site_disorder_group
_oxford_atom_site_special_shape
_atom_site_attached_hydrogens
O1 O 0.60152(11) -0.11255(15) 0.76968(11) 0.0322 1.0000 Uani . . . . . . . 
C2 C 0.57683(17) -0.0082(2) 0.74516(16) 0.0300 1.0000 Uani . . . . . . . 
O3 O 0.59312(15) 0.04230(18) 0.69733(14) 0.0489 1.0000 Uani . . . . . . . 
C4 C 0.52565(16) 0.0370(2) 0.78582(15) 0.0273 1.0000 Uani . . . . . . . 
C5 C 0.51532(16) 0.1649(2) 0.77832(15) 0.0267 1.0000 Uani . . . . . . . 
N6 N 0.51162(13) 0.22082(18) 0.84769(12) 0.0255 1.0000 Uani . . . . . . . 
C7 C 0.46572(16) 0.1579(2) 0.88360(16) 0.0270 1.0000 Uani . . . . . . . 
C8 C 0.43798(15) 0.2280(2) 0.93551(15) 0.0280 1.0000 Uani . . . . . . . 
C9 C 0.42211(18) 0.1761(2) 0.99429(17) 0.0334 1.0000 Uani . . . . . . . 
C10 C 0.39234(19) 0.2340(3) 1.04071(18) 0.0409 1.0000 Uani . . . . . . . 
C11 C 0.37869(19) 0.3476(3) 1.02911(19) 0.0403 1.0000 Uani . . . . . . . 
C12 C 0.39639(19) 0.4019(3) 0.97311(18) 0.0397 1.0000 Uani . . . . . . . 
C13 C 0.42532(18) 0.3424(2) 0.92591(16) 0.0337 1.0000 Uani . . . . . . . 
C14 C 0.59431(16) 0.2622(2) 0.90979(16) 0.0297 1.0000 Uani . . . . . . . 
C15 C 0.66285(16) 0.1738(2) 0.94052(15) 0.0298 1.0000 Uani . . . . . . . 
C16 C 0.67092(18) 0.1067(3) 1.00493(17) 0.0394 1.0000 Uani . . . . . . . 
C17 C 0.7295(2) 0.0206(3) 1.0312(2) 0.0550 1.0000 Uani . . . . . . . 
C18 C 0.7808(2) 0.0007(3) 0.9947(2) 0.0575 1.0000 Uani . . . . . . . 
C19 C 0.77521(19) 0.0680(3) 0.9325(2) 0.0504 1.0000 Uani . . . . . . . 
C20 C 0.71666(17) 0.1538(3) 0.90532(18) 0.0384 1.0000 Uani . . . . . . . 
C21 C 0.61936(19) 0.3674(2) 0.87948(19) 0.0388 1.0000 Uani . . . . . . . 
C22 C 0.44362(15) 0.1976(2) 0.69512(15) 0.0246 1.0000 Uani . . . . . . . 
N23 N 0.35840(12) 0.16301(18) 0.68452(12) 0.0253 1.0000 Uani . . . . . . . 
C24 C 0.31574(15) 0.2483(2) 0.70987(15) 0.0268 1.0000 Uani . . . . . . . 
C25 C 0.23846(16) 0.2053(2) 0.71657(15) 0.0263 1.0000 Uani . . . . . . . 
C26 C 0.17129(17) 0.2784(2) 0.70072(17) 0.0346 1.0000 Uani . . . . . . . 
C27 C 0.09957(19) 0.2432(3) 0.7068(2) 0.0455 1.0000 Uani . . . . . . . 
C28 C 0.09456(19) 0.1349(3) 0.7290(2) 0.0444 1.0000 Uani . . . . . . . 
C29 C 0.1596(2) 0.0628(3) 0.74462(19) 0.0409 1.0000 Uani . . . . . . . 
C30 C 0.23158(17) 0.0974(2) 0.73846(17) 0.0343 1.0000 Uani . . . . . . . 
C31 C 0.30490(16) 0.1358(2) 0.59850(16) 0.0309 1.0000 Uani . . . . . . . 
C32 C 0.32829(15) 0.0277(2) 0.57299(15) 0.0299 1.0000 Uani . . . . . . . 
C33 C 0.32724(18) -0.0717(3) 0.61038(18) 0.0392 1.0000 Uani . . . . . . . 
C34 C 0.3430(2) -0.1727(3) 0.5830(2) 0.0432 1.0000 Uani . . . . . . . 
C35 C 0.3605(2) -0.1754(3) 0.5178(2) 0.0463 1.0000 Uani . . . . . . . 
C36 C 0.3624(2) -0.0772(3) 0.4792(2) 0.0495 1.0000 Uani . . . . . . . 
C37 C 0.34649(19) 0.0233(3) 0.50694(17) 0.0387 1.0000 Uani . . . . . . . 
C38 C 0.45000(16) 0.3208(2) 0.67564(16) 0.0281 1.0000 Uani . . . . . . . 
C39 C 0.51805(18) 0.3470(3) 0.64799(18) 0.0385 1.0000 Uani . . . . . . . 
C40 C 0.5311(2) 0.4710(3) 0.6480(2) 0.0538 1.0000 Uani . . . . . . . 
C41 C 0.4951(2) 0.2971(3) 0.5644(2) 0.0560 1.0000 Uani . . . . . . . 
C42 C 0.64905(17) -0.1788(2) 0.73673(17) 0.0356 1.0000 Uani . . . . . . . 
C43 C 0.6670(3) -0.2850(3) 0.7857(2) 0.0581 1.0000 Uani . . . . . . . 
C44 C 0.5935(2) -0.2014(3) 0.64808(18) 0.0480 1.0000 Uani . . . . . . . 
C45 C 0.7306(2) -0.1211(3) 0.7508(2) 0.0591 1.0000 Uani . . . . . . . 
H41 H 0.5570 0.0156 0.8422 0.0335 1.0000 Uiso R . . . . . . 
H42 H 0.4695 0.0020 0.7620 0.0316 1.0000 Uiso R . . . . . . 
H51 H 0.5686 0.1923 0.7744 0.0343 1.0000 Uiso R . . . . . . 
H71 H 0.5009 0.0955 0.9154 0.0350 1.0000 Uiso R . . . . . . 
H72 H 0.4146 0.1268 0.8384 0.0329 1.0000 Uiso R . . . . . . 
H91 H 0.4300 0.0995 1.0021 0.0421 1.0000 Uiso R . . . . . . 
H101 H 0.3817 0.1978 1.0780 0.0489 1.0000 Uiso R . . . . . . 
H111 H 0.3583 0.3867 1.0605 0.0433 1.0000 Uiso R . . . . . . 
H121 H 0.3883 0.4807 0.9670 0.0489 1.0000 Uiso R . . . . . . 
H131 H 0.4357 0.3792 0.8852 0.0378 1.0000 Uiso R . . . . . . 
H141 H 0.5870 0.2831 0.9580 0.0329 1.0000 Uiso R . . . . . . 
H161 H 0.6373 0.1211 1.0322 0.0434 1.0000 Uiso R . . . . . . 
H171 H 0.7340 -0.0245 1.0756 0.0646 1.0000 Uiso R . . . . . . 
H181 H 0.8192 -0.0573 1.0147 0.0747 1.0000 Uiso R . . . . . . 
H191 H 0.8106 0.0555 0.9070 0.0654 1.0000 Uiso R . . . . . . 
H201 H 0.7114 0.2004 0.8628 0.0483 1.0000 Uiso R . . . . . . 
H211 H 0.6745 0.3914 0.9209 0.0606 1.0000 Uiso R . . . . . . 
H213 H 0.5784 0.4247 0.8703 0.0603 1.0000 Uiso R . . . . . . 
H212 H 0.6227 0.3535 0.8312 0.0601 1.0000 Uiso R . . . . . . 
H221 H 0.4551 0.1526 0.6570 0.0321 1.0000 Uiso R . . . . . . 
H242 H 0.3573 0.2757 0.7640 0.0377 1.0000 Uiso R . . . . . . 
H241 H 0.2977 0.3125 0.6748 0.0354 1.0000 Uiso R . . . . . . 
H261 H 0.1770 0.3519 0.6856 0.0447 1.0000 Uiso R . . . . . . 
H271 H 0.0556 0.2936 0.6982 0.0543 1.0000 Uiso R . . . . . . 
H281 H 0.0462 0.1096 0.7324 0.0499 1.0000 Uiso R . . . . . . 
H291 H 0.1548 -0.0113 0.7602 0.0409 1.0000 Uiso R . . . . . . 
H301 H 0.2759 0.0463 0.7491 0.0440 1.0000 Uiso R . . . . . . 
H312 H 0.2469 0.1283 0.5898 0.0335 1.0000 Uiso R . . . . . . 
H311 H 0.3087 0.1934 0.5611 0.0348 1.0000 Uiso R . . . . . . 
H331 H 0.3160 -0.0695 0.6556 0.0431 1.0000 Uiso R . . . . . . 
H341 H 0.3406 -0.2405 0.6125 0.0505 1.0000 Uiso R . . . . . . 
H351 H 0.3731 -0.2428 0.4981 0.0571 1.0000 Uiso R . . . . . . 
H361 H 0.3761 -0.0798 0.4351 0.0577 1.0000 Uiso R . . . . . . 
H371 H 0.3481 0.0903 0.4798 0.0449 1.0000 Uiso R . . . . . . 
H381 H 0.4670 0.3621 0.7282 0.0362 1.0000 Uiso R . . . . . . 
H382 H 0.3945 0.3454 0.6355 0.0350 1.0000 Uiso R . . . . . . 
H391 H 0.5737 0.3132 0.6858 0.0477 1.0000 Uiso R . . . . . . 
H401 H 0.5718 0.4885 0.6275 0.0852 1.0000 Uiso R . . . . . . 
H402 H 0.5509 0.5013 0.7021 0.0852 1.0000 Uiso R . . . . . . 
H403 H 0.4782 0.5050 0.6140 0.0847 1.0000 Uiso R . . . . . . 
H412 H 0.5355 0.3210 0.5474 0.0878 1.0000 Uiso R . . . . . . 
H411 H 0.4931 0.2161 0.5630 0.0883 1.0000 Uiso R . . . . . . 
H413 H 0.4416 0.3245 0.5245 0.0878 1.0000 Uiso R . . . . . . 
H432 H 0.6951 -0.3374 0.7652 0.0894 1.0000 Uiso R . . . . . . 
H431 H 0.7037 -0.2674 0.8391 0.0894 1.0000 Uiso R . . . . . . 
H433 H 0.6148 -0.3161 0.7798 0.0885 1.0000 Uiso R . . . . . . 
H442 H 0.6204 -0.2517 0.6245 0.0732 1.0000 Uiso R . . . . . . 
H441 H 0.5394 -0.2343 0.6417 0.0730 1.0000 Uiso R . . . . . . 
H443 H 0.5834 -0.1316 0.6178 0.0731 1.0000 Uiso R . . . . . . 
H452 H 0.7660 -0.1723 0.7435 0.0937 1.0000 Uiso R . . . . . . 
H451 H 0.7579 -0.0967 0.8066 0.0948 1.0000 Uiso R . . . . . . 
H453 H 0.7190 -0.0585 0.7156 0.0942 1.0000 Uiso R . . . . . . 
loop_
_atom_site_aniso_label
_atom_site_aniso_U_11
_atom_site_aniso_U_22
_atom_site_aniso_U_33
_atom_site_aniso_U_23
_atom_site_aniso_U_13
_atom_site_aniso_U_12
O1 0.0362(10) 0.0302(11) 0.0340(10) -0.0020(8) 0.0190(8) 0.0079(8) 
C2 0.0341(14) 0.0264(15) 0.0315(14) -0.0006(12) 0.0165(12) 0.0042(12) 
O3 0.0701(15) 0.0372(12) 0.0610(14) 0.0083(11) 0.0487(13) 0.0114(11) 
C4 0.0247(13) 0.0288(14) 0.0265(13) -0.0019(11) 0.0097(11) 0.0017(11) 
C5 0.0248(12) 0.0276(14) 0.0295(13) 0.0006(11) 0.0136(11) 0.0006(11) 
N6 0.0250(11) 0.0274(12) 0.0246(10) -0.0026(9) 0.0114(9) -0.0008(9) 
C7 0.0302(13) 0.0215(14) 0.0292(13) -0.0013(11) 0.0132(11) 0.0010(11) 
C8 0.0207(12) 0.0313(16) 0.0300(13) -0.0039(11) 0.0094(10) 0.0007(11) 
C9 0.0418(16) 0.0255(14) 0.0417(15) -0.0027(13) 0.0264(13) -0.0020(12) 
C10 0.0451(17) 0.045(2) 0.0432(16) -0.0006(15) 0.0295(14) -0.0017(14) 
C11 0.0376(16) 0.0466(19) 0.0442(17) -0.0125(15) 0.0250(14) -0.0014(14) 
C12 0.0450(17) 0.0314(16) 0.0447(17) -0.0050(14) 0.0217(14) 0.0033(14) 
C13 0.0391(16) 0.0292(16) 0.0329(14) -0.0001(12) 0.0161(13) 0.0020(12) 
C14 0.0306(13) 0.0288(15) 0.0288(13) -0.0049(12) 0.0123(11) -0.0045(12) 
C15 0.0253(13) 0.0286(15) 0.0290(14) -0.0036(12) 0.0062(11) -0.0046(11) 
C16 0.0315(15) 0.0444(18) 0.0296(14) -0.0001(13) 0.0020(12) -0.0092(13) 
C17 0.046(2) 0.043(2) 0.0496(19) 0.0085(16) -0.0021(16) -0.0099(16) 
C18 0.0373(18) 0.0361(19) 0.072(2) -0.0081(18) -0.0004(17) 0.0009(15) 
C19 0.0293(16) 0.050(2) 0.061(2) -0.0186(18) 0.0105(15) 0.0004(14) 
C20 0.0276(14) 0.0413(18) 0.0390(15) -0.0057(14) 0.0081(12) -0.0001(13) 
C21 0.0376(16) 0.0293(16) 0.0421(16) -0.0028(13) 0.0111(13) -0.0064(13) 
C22 0.0241(13) 0.0251(14) 0.0237(12) -0.0016(10) 0.0097(10) 0.0025(10) 
N23 0.0229(10) 0.0251(11) 0.0262(11) -0.0027(9) 0.0094(9) -0.0016(9) 
C24 0.0272(13) 0.0210(13) 0.0310(13) 0.0003(11) 0.0118(11) 0.0024(11) 
C25 0.0240(13) 0.0299(14) 0.0264(12) -0.0036(11) 0.0123(10) -0.0003(11) 
C26 0.0348(15) 0.0296(16) 0.0421(15) -0.0009(12) 0.0194(13) 0.0017(12) 
C27 0.0341(16) 0.047(2) 0.060(2) -0.0052(16) 0.0255(15) 0.0056(14) 
C28 0.0325(16) 0.050(2) 0.0565(19) -0.0070(16) 0.0248(14) -0.0087(14) 
C29 0.0478(19) 0.0317(16) 0.0464(17) 0.0015(14) 0.0237(15) -0.0080(14) 
C30 0.0307(15) 0.0329(16) 0.0386(15) 0.0060(13) 0.0146(13) 0.0036(12) 
C31 0.0235(13) 0.0374(16) 0.0274(13) -0.0040(12) 0.0071(11) 0.0013(11) 
C32 0.0214(13) 0.0365(16) 0.0250(12) -0.0044(12) 0.0041(11) -0.0020(11) 
C33 0.0387(16) 0.0402(18) 0.0359(15) -0.0067(14) 0.0140(13) -0.0017(14) 
C34 0.0460(17) 0.0278(16) 0.0503(18) -0.0069(14) 0.0163(15) -0.0017(14) 
C35 0.0467(18) 0.0406(19) 0.0496(18) -0.0159(16) 0.0197(15) 0.0009(15) 
C36 0.051(2) 0.058(2) 0.0415(17) -0.0141(16) 0.0229(15) 0.0009(17) 
C37 0.0433(17) 0.0392(17) 0.0338(15) 0.0009(13) 0.0173(13) -0.0002(14) 
C38 0.0266(13) 0.0283(15) 0.0300(13) 0.0049(11) 0.0129(11) 0.0034(11) 
C39 0.0342(15) 0.0422(18) 0.0444(17) 0.0084(14) 0.0222(14) 0.0014(13) 
C40 0.053(2) 0.049(2) 0.071(2) 0.0110(18) 0.0382(19) -0.0060(17) 
C41 0.062(2) 0.067(2) 0.053(2) 0.0099(18) 0.0392(18) 0.0115(19) 
C42 0.0344(15) 0.0383(17) 0.0343(14) -0.0083(13) 0.0153(12) 0.0088(13) 
C43 0.071(2) 0.052(2) 0.056(2) 0.0037(17) 0.0321(19) 0.0321(19) 
C44 0.055(2) 0.051(2) 0.0371(16) -0.0113(15) 0.0196(15) 0.0098(16) 
C45 0.0416(19) 0.061(2) 0.081(3) -0.023(2) 0.0329(18) -0.0022(17) 

_refine_ls_extinction_method 
    'None'
_oxford_refine_ls_scale 0.2207(6) 
loop_
 _geom_bond_atom_site_label_1
 _geom_bond_site_symmetry_1
 _geom_bond_atom_site_label_2
 _geom_bond_site_symmetry_2
 _geom_bond_distance
 _geom_bond_publ_flag
O1 . C2 . 1.338(3)    yes
O1 . C42 . 1.472(3)    yes
C2 . O3 . 1.208(3)    yes
C2 . C4 . 1.512(4)    yes
C4 . C5 . 1.545(4)    yes
C4 . H41 . 0.975    no
C4 . H42 . 0.985    no
C5 . N6 . 1.475(3)    yes
C5 . C22 . 1.550(3)    yes
C5 . H51 . 1.031    no
N6 . C7 . 1.467(3)    yes
N6 . C14 . 1.490(3)    yes
C7 . C8 . 1.513(4)    yes
C7 . H71 . 0.986    no
C7 . H72 . 0.994    no
C8 . C9 . 1.386(4)    yes
C8 . C13 . 1.389(4)    yes
C9 . C10 . 1.379(4)    yes
C9 . H91 . 0.932    no
C10 . C11 . 1.385(4)    yes
C10 . H101 . 0.903    no
C11 . C12 . 1.372(4)    yes
C11 . H111 . 0.935    no
C12 . C13 . 1.390(4)    yes
C12 . H121 . 0.956    no
C13 . H131 . 0.959    no
C14 . C15 . 1.520(4)    yes
C14 . C21 . 1.525(4)    yes
C14 . H141 . 0.989    no
C15 . C16 . 1.392(4)    yes
C15 . C20 . 1.393(4)    yes
C16 . C17 . 1.390(5)    yes
C16 . H161 . 0.952    no
C17 . C18 . 1.372(5)    yes
C17 . H171 . 0.958    no
C18 . C19 . 1.372(5)    yes
C18 . H181 . 0.929    no
C19 . C20 . 1.388(4)    yes
C19 . H191 . 0.948    no
C20 . H201 . 0.936    no
C21 . H211 . 0.980    no
C21 . H213 . 0.958    no
C21 . H212 . 0.936    no
C22 . N23 . 1.492(3)    yes
C22 . C38 . 1.538(4)    yes
C22 . H221 . 0.979    no
N23 . C24 . 1.468(3)    yes
N23 . C31 . 1.484(3)    yes
C24 . C25 . 1.518(3)    yes
C24 . H242 . 0.999    no
C24 . H241 . 0.966    no
C25 . C26 . 1.401(4)    yes
C25 . C30 . 1.378(4)    yes
C26 . C27 . 1.390(4)    yes
C26 . H261 . 0.944    no
C27 . C28 . 1.378(5)    yes
C27 . H271 . 0.942    no
C28 . C29 . 1.366(4)    yes
C28 . H281 . 0.937    no
C29 . C30 . 1.392(4)    yes
C29 . H291 . 0.950    no
C30 . H301 . 0.946    no
C31 . C32 . 1.501(4)    yes
C31 . H312 . 0.970    no
C31 . H311 . 1.001    no
C32 . C33 . 1.384(4)    yes
C32 . C37 . 1.396(4)    yes
C33 . C34 . 1.388(4)    yes
C33 . H331 . 0.942    no
C34 . C35 . 1.374(5)    yes
C34 . H341 . 0.991    no
C35 . C36 . 1.387(5)    yes
C35 . H351 . 0.953    no
C36 . C37 . 1.388(5)    yes
C36 . H361 . 0.948    no
C37 . H371 . 0.955    no
C38 . C39 . 1.536(4)    yes
C38 . H381 . 1.012    no
C38 . H382 . 0.979    no
C39 . C40 . 1.506(4)    yes
C39 . C41 . 1.536(5)    yes
C39 . H391 . 1.007    no
C40 . H401 . 0.974    no
C40 . H402 . 0.972    no
C40 . H403 . 0.958    no
C41 . H412 . 0.945    no
C41 . H411 . 0.973    no
C41 . H413 . 0.965    no
C42 . C43 . 1.515(5)    yes
C42 . C44 . 1.517(4)    yes
C42 . C45 . 1.517(4)    yes
C43 . H432 . 0.977    no
C43 . H431 . 0.934    no
C43 . H433 . 0.957    no
C44 . H442 . 0.984    no
C44 . H441 . 0.992    no
C44 . H443 . 0.980    no
C45 . H452 . 0.930    no
C45 . H451 . 0.971    no
C45 . H453 . 0.954    no
loop_
 _geom_angle_atom_site_label_1
 _geom_angle_site_symmetry_1
 _geom_angle_atom_site_label_2
 _geom_angle_site_symmetry_2
 _geom_angle_atom_site_label_3
 _geom_angle_site_symmetry_3
 _geom_angle
 _geom_angle_publ_flag
C2 . O1 . C42 . 121.7(2)    yes
O1 . C2 . O3 . 124.7(2)    yes
O1 . C2 . C4 . 110.2(2)    yes
O3 . C2 . C4 . 125.1(3)    yes
C2 . C4 . C5 . 112.7(2)    yes
C2 . C4 . H41 . 104.8    no
C5 . C4 . H41 . 110.3    no
C2 . C4 . H42 . 109.4    no
C5 . C4 . H42 . 109.1    no
H41 . C4 . H42 . 110.4    no
C4 . C5 . N6 . 115.0(2)    yes
C4 . C5 . C22 . 110.6(2)    yes
N6 . C5 . C22 . 114.6(2)    yes
C4 . C5 . H51 . 104.3    no
N6 . C5 . H51 . 108.2    no
C22 . C5 . H51 . 102.8    no
C5 . N6 . C7 . 114.1(2)    yes
C5 . N6 . C14 . 114.53(19)    yes
C7 . N6 . C14 . 112.01(19)    yes
N6 . C7 . C8 . 113.7(2)    yes
N6 . C7 . H71 . 109.3    no
C8 . C7 . H71 . 109.9    no
N6 . C7 . H72 . 107.1    no
C8 . C7 . H72 . 108.2    no
H71 . C7 . H72 . 108.4    no
C7 . C8 . C9 . 118.9(2)    yes
C7 . C8 . C13 . 123.2(2)    yes
C9 . C8 . C13 . 117.9(3)    yes
C8 . C9 . C10 . 121.9(3)    yes
C8 . C9 . H91 . 119.7    no
C10 . C9 . H91 . 118.4    no
C9 . C10 . C11 . 119.3(3)    yes
C9 . C10 . H101 . 120.0    no
C11 . C10 . H101 . 120.7    no
C10 . C11 . C12 . 120.1(3)    yes
C10 . C11 . H111 . 119.1    no
C12 . C11 . H111 . 120.8    no
C11 . C12 . C13 . 120.1(3)    yes
C11 . C12 . H121 . 119.1    no
C13 . C12 . H121 . 120.8    no
C12 . C13 . C8 . 120.7(3)    yes
C12 . C13 . H131 . 120.7    no
C8 . C13 . H131 . 118.6    no
N6 . C14 . C15 . 113.9(2)    yes
N6 . C14 . C21 . 109.8(2)    yes
C15 . C14 . C21 . 113.6(2)    yes
N6 . C14 . H141 . 107.7    no
C15 . C14 . H141 . 104.0    no
C21 . C14 . H141 . 107.3    no
C14 . C15 . C16 . 119.1(3)    yes
C14 . C15 . C20 . 123.0(2)    yes
C16 . C15 . C20 . 117.9(3)    yes
C15 . C16 . C17 . 120.4(3)    yes
C15 . C16 . H161 . 119.9    no
C17 . C16 . H161 . 119.6    no
C16 . C17 . C18 . 120.7(3)    yes
C16 . C17 . H171 . 119.0    no
C18 . C17 . H171 . 120.2    no
C17 . C18 . C19 . 119.6(3)    yes
C17 . C18 . H181 . 117.6    no
C19 . C18 . H181 . 122.9    no
C18 . C19 . C20 . 120.3(3)    yes
C18 . C19 . H191 . 120.4    no
C20 . C19 . H191 . 119.3    no
C15 . C20 . C19 . 121.0(3)    yes
C15 . C20 . H201 . 117.2    no
C19 . C20 . H201 . 121.8    no
C14 . C21 . H211 . 107.9    no
C14 . C21 . H213 . 109.8    no
H211 . C21 . H213 . 110.0    no
C14 . C21 . H212 . 110.9    no
H211 . C21 . H212 . 109.6    no
H213 . C21 . H212 . 108.7    no
C5 . C22 . N23 . 113.3(2)    yes
C5 . C22 . C38 . 111.3(2)    yes
N23 . C22 . C38 . 114.3(2)    yes
C5 . C22 . H221 . 103.7    no
N23 . C22 . H221 . 105.8    no
C38 . C22 . H221 . 107.5    no
C22 . N23 . C24 . 113.5(2)    yes
C22 . N23 . C31 . 109.3(2)    yes
C24 . N23 . C31 . 108.77(19)    yes
N23 . C24 . C25 . 113.5(2)    yes
N23 . C24 . H242 . 107.2    no
C25 . C24 . H242 . 108.6    no
N23 . C24 . H241 . 113.9    no
C25 . C24 . H241 . 106.6    no
H242 . C24 . H241 . 106.8    no
C24 . C25 . C26 . 118.9(2)    yes
C24 . C25 . C30 . 123.0(2)    yes
C26 . C25 . C30 . 118.2(2)    yes
C25 . C26 . C27 . 121.0(3)    yes
C25 . C26 . H261 . 117.1    no
C27 . C26 . H261 . 121.9    no
C26 . C27 . C28 . 119.5(3)    yes
C26 . C27 . H271 . 120.5    no
C28 . C27 . H271 . 119.9    no
C27 . C28 . C29 . 120.1(3)    yes
C27 . C28 . H281 . 120.5    no
C29 . C28 . H281 . 119.4    no
C28 . C29 . C30 . 120.7(3)    yes
C28 . C29 . H291 . 118.5    no
C30 . C29 . H291 . 120.8    no
C29 . C30 . C25 . 120.5(3)    yes
C29 . C30 . H301 . 119.6    no
C25 . C30 . H301 . 119.8    no
N23 . C31 . C32 . 113.2(2)    yes
N23 . C31 . H312 . 108.9    no
C32 . C31 . H312 . 106.6    no
N23 . C31 . H311 . 112.5    no
C32 . C31 . H311 . 105.5    no
H312 . C31 . H311 . 109.8    no
C31 . C32 . C33 . 121.5(2)    yes
C31 . C32 . C37 . 120.7(3)    yes
C33 . C32 . C37 . 117.7(3)    yes
C32 . C33 . C34 . 121.4(3)    yes
C32 . C33 . H331 . 118.3    no
C34 . C33 . H331 . 120.2    no
C33 . C34 . C35 . 120.1(3)    yes
C33 . C34 . H341 . 116.9    no
C35 . C34 . H341 . 123.1    no
C34 . C35 . C36 . 120.0(3)    yes
C34 . C35 . H351 . 122.6    no
C36 . C35 . H351 . 117.4    no
C35 . C36 . C37 . 119.5(3)    yes
C35 . C36 . H361 . 119.3    no
C37 . C36 . H361 . 121.3    no
C32 . C37 . C36 . 121.4(3)    yes
C32 . C37 . H371 . 120.0    no
C36 . C37 . H371 . 118.6    no
C22 . C38 . C39 . 115.2(2)    yes
C22 . C38 . H381 . 105.5    no
C39 . C38 . H381 . 106.0    no
C22 . C38 . H382 . 108.4    no
C39 . C38 . H382 . 110.9    no
H381 . C38 . H382 . 110.6    no
C38 . C39 . C40 . 110.2(2)    yes
C38 . C39 . C41 . 111.1(3)    yes
C40 . C39 . C41 . 110.9(3)    yes
C38 . C39 . H391 . 110.9    no
C40 . C39 . H391 . 107.2    no
C41 . C39 . H391 . 106.4    no
C39 . C40 . H401 . 110.7    no
C39 . C40 . H402 . 110.7    no
H401 . C40 . H402 . 109.2    no
C39 . C40 . H403 . 108.4    no
H401 . C40 . H403 . 109.3    no
H402 . C40 . H403 . 108.5    no
C39 . C41 . H412 . 108.4    no
C39 . C41 . H411 . 113.9    no
H412 . C41 . H411 . 108.6    no
C39 . C41 . H413 . 111.6    no
H412 . C41 . H413 . 106.0    no
H411 . C41 . H413 . 107.9    no
O1 . C42 . C43 . 102.3(2)    yes
O1 . C42 . C44 . 109.2(2)    yes
C43 . C42 . C44 . 111.1(3)    yes
O1 . C42 . C45 . 111.0(2)    yes
C43 . C42 . C45 . 110.5(3)    yes
C44 . C42 . C45 . 112.3(3)    yes
C42 . C43 . H432 . 108.4    no
C42 . C43 . H431 . 107.8    no
H432 . C43 . H431 . 108.7    no
C42 . C43 . H433 . 108.9    no
H432 . C43 . H433 . 109.7    no
H431 . C43 . H433 . 113.2    no
C42 . C44 . H442 . 112.3    no
C42 . C44 . H441 . 109.2    no
H442 . C44 . H441 . 109.6    no
C42 . C44 . H443 . 109.3    no
H442 . C44 . H443 . 105.8    no
H441 . C44 . H443 . 110.5    no
C42 . C45 . H452 . 108.9    no
C42 . C45 . H451 . 107.8    no
H452 . C45 . H451 . 107.7    no
C42 . C45 . H453 . 110.0    no
H452 . C45 . H453 . 112.1    no
H451 . C45 . H453 . 110.1    no
loop_
 _geom_hbond_atom_site_label_D
 _geom_hbond_site_symmetry_D
 _geom_hbond_atom_site_label_H
 _geom_hbond_site_symmetry_H
 _geom_hbond_atom_site_label_A
 _geom_hbond_site_symmetry_A
 _geom_hbond_angle_DHA
 _geom_hbond_distance_DH
 _geom_hbond_distance_HA
 _geom_hbond_distance_DA
 _geom_hbond_publ_flag
C22 . H221 . O3 . 123 0.98 2.58 3.223(5)    yes
C24 . H242 . N6 . 129 1.00 2.56 3.287(5)    yes

#==============================================================================
data_49 
_ccdc_journal_depnumber            '852576'
#==============================================================================

_cell_length_a                    10.26594(7)
_cell_length_b                    9.75883(8)
_cell_length_c                    17.96995(14)
_cell_angle_alpha                 90
_cell_angle_beta                  98.0805(7)
_cell_angle_gamma                 90
_cell_volume                      1782.42(2)
 
_symmetry_cell_setting            'Monoclinic' 
_symmetry_space_group_name_H-M    'P 1 21 1' 
_symmetry_space_group_name_Hall   'P 2yb' 
loop_
 _symmetry_equiv_pos_as_xyz
 'x,y,z'
 '-x,y+1/2,-z'

loop_
_atom_type_symbol
_atom_type_scat_dispersion_real
_atom_type_scat_dispersion_imag
_atom_type_scat_Cromer_Mann_a1
_atom_type_scat_Cromer_Mann_b1
_atom_type_scat_Cromer_Mann_a2
_atom_type_scat_Cromer_Mann_b2
_atom_type_scat_Cromer_Mann_a3
_atom_type_scat_Cromer_Mann_b3
_atom_type_scat_Cromer_Mann_a4
_atom_type_scat_Cromer_Mann_b4
_atom_type_scat_Cromer_Mann_c
_atom_type_scat_source  
 C       0.0181   0.0091   2.3100  20.8439   1.0200  10.2075   1.5886   0.5687
   0.8650  51.6512   0.2156 'International Tables Vol C 4.2.6.8 and 6.1.1.4'
 H       0.0000   0.0000   0.4930  10.5109   0.3229  26.1257   0.1402   3.1424
   0.0408  57.7998   0.0030 'International Tables Vol C 4.2.6.8 and 6.1.1.4'
 N       0.0311   0.0180  12.2126   0.0057   3.1322   9.8933   2.0125  28.9975
   1.1663   0.5826 -11.5290 'International Tables Vol C 4.2.6.8 and 6.1.1.4'
 O       0.0492   0.0322   3.0485  13.2771   2.2868   5.7011   1.5463   0.3239
   0.8670  32.9089   0.2508 'International Tables Vol C 4.2.6.8 and 6.1.1.4'
 
_cell_formula_units_Z                    2

# Given Formula = C40 H50 N2 O4 
# Dc =      1.16 Fooo =    672.00 Mu =      5.82 M =    622.85
# Found Formula = C40 H50 N2 O4 
# Dc =      1.16 FOOO =    672.00 Mu =      5.82 M =    622.85

_chemical_formula_sum             'C40 H50 N2 O4'
_chemical_formula_moiety          'C40 H50 N2 O4'
_chemical_compound_source                .
_chemical_formula_weight            622.85
 
_cell_measurement_reflns_used            0
_cell_measurement_theta_min              0
_cell_measurement_theta_max              0
_cell_measurement_temperature          150
 
_exptl_crystal_description        'block' 
_exptl_crystal_colour             'colourless' 
_exptl_crystal_size_min           0.070 
_exptl_crystal_size_mid           0.090 
_exptl_crystal_size_max           0.330 
 
_exptl_crystal_density_diffrn     1.160 
_exptl_crystal_density_meas       . 
_exptl_crystal_density_method     'not measured' 
# Non-dispersive F(000): 
_exptl_crystal_F_000              672 
_exptl_absorpt_coefficient_mu     0.582 
 
# Sheldrick geometric approximatio 0.95 0.96 
_exptl_absorpt_correction_type    none 
_exptl_absorpt_correction_T_min   0.9489 
_exptl_absorpt_correction_T_max   0.9600 
_diffrn_measurement_device_type   'Unknown' 
_diffrn_measurement_device        'Serial' 
_diffrn_radiation_monochromator   'graphite' 
_diffrn_radiation_type            'Cu K\a'
_diffrn_radiation_wavelength           1.54184
_diffrn_measurement_method        \w/2\q 
 
# If a reference occurs more than once, delete the author 
# and date from subsequent references. 
_computing_data_collection        'USER DEFINED DATA COLLECTION' 
_computing_cell_refinement        'USER DEFINED CELL REFINEMENT' 
_computing_data_reduction         'USER DEFINED DATA REDUCTION' 
_computing_structure_solution     'SIR92 (Altomare et al., 1994)' 
_computing_structure_refinement   'CRYSTALS (Betteridge et al., 2003)' 
_computing_publication_material   'CRYSTALS (Betteridge et al., 2003)' 
_computing_molecular_graphics     'CAMERON (Watkin et al., 1996)' 
 
_diffrn_standards_interval_time   . 
_diffrn_standards_interval_count  . 
_diffrn_standards_number          0 
_diffrn_standards_decay_%         . 
 
_diffrn_ambient_temperature        150
_diffrn_reflns_number             60667 
_reflns_number_total              3967 
_diffrn_reflns_av_R_equivalents   0.045 
# Number of reflections without Friedels Law is 0 
# Number of reflections with Friedels Law is 3967 
# Theoretical number of reflections is about 7478 
 
_diffrn_reflns_theta_min          4.350 
_diffrn_reflns_theta_max          76.366 
_diffrn_measured_fraction_theta_max 0.998 
 
_diffrn_reflns_theta_full         76.366 
_diffrn_measured_fraction_theta_full 0.998 
 
_diffrn_reflns_limit_h_min        -12 
_diffrn_reflns_limit_h_max        12 
_diffrn_reflns_limit_k_min        -11 
_diffrn_reflns_limit_k_max        12 
_diffrn_reflns_limit_l_min        -22 
_diffrn_reflns_limit_l_max        22 
_reflns_limit_h_min               -12 
_reflns_limit_h_max               12 
_reflns_limit_k_min               0 
_reflns_limit_k_max               12 
_reflns_limit_l_min               0 
_reflns_limit_l_max               22 
 
_oxford_diffrn_Wilson_B_factor    3.22 
_oxford_diffrn_Wilson_scale       0.02 
 
_atom_sites_solution_primary      direct #heavy,direct,difmap,geom
# _atom_sites_solution_secondary  difmap
_atom_sites_solution_hydrogens    geom
 
_refine_diff_density_min          -0.36 
_refine_diff_density_max          0.48 
 
# The current dictionary definitions do not cover the 
# situation where the reflections used for refinement were 
# selected by a user-defined sigma threshold 
 
# The values actually used during refinement 
_oxford_reflns_threshold_expression_ref     I>-3.0\s(I)
_refine_ls_number_reflns          3966 
_refine_ls_number_restraints      1 
_refine_ls_number_parameters      415 
_oxford_refine_ls_R_factor_ref    0.0463 
_refine_ls_wR_factor_ref          0.1336 
_refine_ls_goodness_of_fit_ref    1.0828 
_refine_ls_shift/su_max           0.0003156 
_refine_ls_shift/su_mean          0.0000333 
 
# The values computed from all data 
_oxford_reflns_number_all         3967 
_refine_ls_R_factor_all           0.0463 
_refine_ls_wR_factor_all          0.1336 
 
# The values computed with a 2 sigma cutoff - a la SHELX 
_reflns_threshold_expression      I>2.0\s(I)
_reflns_number_gt                 3881 
_refine_ls_R_factor_gt            0.0456 
_refine_ls_wR_factor_gt           0.1326 
 
# choose from: rm (reference molecule of known chirality), 
# ad (anomolous dispersion - Flack), rmad (rm and ad), 
# syn (from synthesis), unk (unknown) or . (not applicable). 
_chemical_absolute_configuration  'unk' 
 
_refine_ls_structure_factor_coef  Fsqd 
_refine_ls_matrix_type            full
_refine_ls_hydrogen_treatment     none           # none, undef, noref, refall,
                                                 # refxyz, refU, constr or mixed
_refine_ls_weighting_scheme       calc 
_refine_ls_weighting_details 
;
 Method, part 1, Chebychev polynomial, (Watkin, 1994, Prince, 1982) 
 [weight] = 1.0/[A~0~*T~0~(x)+A~1~*T~1~(x) ... +A~n-1~]*T~n-1~(x)] 
 where A~i~ are the Chebychev coefficients listed below and x= Fcalc/Fmax 
 Method = Robust Weighting (Prince, 1982) 
 W = [weight] * [1-(deltaF/6*sigmaF)^2^]^2^ 
 A~i~ are: 
 0.351E+04 0.602E+04 0.384E+04 0.169E+04 423. 
;
# Insert your own references if required - in alphabetical order 
_publ_section_references 
; 
User-defined data collection reference 
 
User defined data reduction 
 
User defined cell refinement 
 
Altomare, A., Cascarano, G., Giacovazzo, C., Guagliardi, A., Burla, M.C., 
Polidori, G. & Camalli, M. (1994). J. Appl. Cryst. 27, 435. 
 
Betteridge, P.W., Carruthers, J.R., Cooper, R.I., 
Prout, K. & Watkin, D.J. (2003). J. Appl. Cryst. 36, 1487. 
 
Prince, E. 
Mathematical Techniques in Crystallography 
and Materials Science 
Springer-Verlag, New York, 1982. 
 
Watkin D.J. (1994). 
Acta Cryst, A50, 411-437. 
 
Watkin, D.J., Prout, C.K. & Pearce, L.J. (1996). CAMERON, Chemical 
Crystallography Laboratory, Oxford, UK. 
; 

# Uequiv = arithmetic mean of Ui i.e. Ueqiv = (U1+U2+U3)/3

# Replace last . with number of unfound hydrogen atomsattached to an atom.

# ..._refinement_flags_... 
# . no refinement constraints           S special position constraint on site
# G rigid group refinement of site      R riding atom
# D distance or angle restraint on site T thermal displacement constraints
# U Uiso or Uij restraint (rigid bond)  P partial occupancy constraint

loop_
_atom_site_label
_atom_site_type_symbol
_atom_site_fract_x
_atom_site_fract_y
_atom_site_fract_z
_atom_site_U_iso_or_equiv
_atom_site_occupancy
_atom_site_adp_type
_atom_site_refinement_flags_posn
_atom_site_refinement_flags_adp
_atom_site_refinement_flags_occupancy
_atom_site_disorder_assembly
_atom_site_disorder_group
_oxford_atom_site_special_shape
_atom_site_attached_hydrogens
O1 O 0.17670(13) 0.43531(16) 0.53757(7) 0.0314 1.0000 Uani . . . . . . . 
C2 C 0.23984(18) 0.4326(2) 0.46805(10) 0.0305 1.0000 Uani . . . . . . . 
C3 C 0.3489(2) 0.5386(2) 0.48591(14) 0.0407 1.0000 Uani . . . . . . . 
C4 C 0.2985(2) 0.2924(2) 0.45706(13) 0.0418 1.0000 Uani . . . . . . . 
C5 C 0.1401(2) 0.4776(3) 0.40187(12) 0.0450 1.0000 Uani . . . . . . . 
C6 C 0.07423(17) 0.3533(2) 0.54490(10) 0.0311 1.0000 Uani . . . . . . . 
O7 O 0.02929(15) 0.26814(19) 0.49967(8) 0.0414 1.0000 Uani . . . . . . . 
C8 C 0.01726(18) 0.3851(2) 0.61604(10) 0.0315 1.0000 Uani . . . . . . . 
C9 C 0.11599(16) 0.41025(19) 0.68952(9) 0.0265 1.0000 Uani . . . . . . . 
N10 N 0.06690(16) 0.50443(17) 0.74229(8) 0.0286 1.0000 Uani . . . . . . . 
C11 C 0.05441(19) 0.6452(2) 0.71416(12) 0.0332 1.0000 Uani . . . . . . . 
C12 C 0.18769(19) 0.7120(2) 0.71388(11) 0.0308 1.0000 Uani . . . . . . . 
C13 C 0.21906(19) 0.7758(2) 0.64918(11) 0.0310 1.0000 Uani . . . . . . . 
C14 C 0.34002(19) 0.8414(2) 0.64958(11) 0.0322 1.0000 Uani . . . . . . . 
O15 O 0.37891(15) 0.9084(2) 0.58999(9) 0.0435 1.0000 Uani . . . . . . . 
C16 C 0.2826(2) 0.9286(2) 0.52595(12) 0.0399 1.0000 Uani . . . . . . . 
C17 C 0.4312(2) 0.8418(2) 0.71584(12) 0.0353 1.0000 Uani . . . . . . . 
O18 O 0.54778(15) 0.9092(2) 0.71110(10) 0.0460 1.0000 Uani . . . . . . . 
C19 C 0.6382(3) 0.9176(4) 0.77827(17) 0.0607 1.0000 Uani . . . . . . . 
C20 C 0.4008(2) 0.7779(3) 0.77993(12) 0.0398 1.0000 Uani . . . . . . . 
C21 C 0.2781(2) 0.7133(2) 0.77857(12) 0.0374 1.0000 Uani . . . . . . . 
C22 C -0.03643(19) 0.4528(2) 0.78450(10) 0.0308 1.0000 Uani . . . . . . . 
C23 C -0.17173(18) 0.4296(2) 0.73994(10) 0.0304 1.0000 Uani . . . . . . . 
C24 C -0.2198(2) 0.2963(2) 0.72888(12) 0.0359 1.0000 Uani . . . . . . . 
C25 C -0.3434(2) 0.2698(3) 0.68820(13) 0.0420 1.0000 Uani . . . . . . . 
C26 C -0.4217(2) 0.3785(3) 0.65842(12) 0.0458 1.0000 Uani . . . . . . . 
C27 C -0.3768(2) 0.5116(3) 0.66988(14) 0.0465 1.0000 Uani . . . . . . . 
C28 C -0.2534(2) 0.5369(2) 0.71019(13) 0.0380 1.0000 Uani . . . . . . . 
C29 C -0.0452(2) 0.5410(3) 0.85381(12) 0.0420 1.0000 Uani . . . . . . . 
C30 C 0.15992(18) 0.2713(2) 0.72522(10) 0.0303 1.0000 Uani . . . . . . . 
N31 N 0.24041(15) 0.2878(2) 0.79993(9) 0.0323 1.0000 Uani . . . . . . . 
C32 C 0.3697(2) 0.3480(3) 0.79502(12) 0.0390 1.0000 Uani . . . . . . . 
C33 C 0.4421(2) 0.3836(3) 0.87059(13) 0.0448 1.0000 Uani . . . . . . . 
C34 C 0.3794(3) 0.4516(3) 0.92411(16) 0.0536 1.0000 Uani . . . . . . . 
C35 C 0.4499(3) 0.4779(4) 0.9958(2) 0.0672 1.0000 Uani . . . . . . . 
C36 C 0.5822(4) 0.4389(5) 1.0148(2) 0.0753 1.0000 Uani . . . . . . . 
C37 C 0.6429(3) 0.3757(5) 0.9599(2) 0.0762 1.0000 Uani . . . . . . . 
C38 C 0.5750(3) 0.3487(4) 0.88840(18) 0.0618 1.0000 Uani . . . . . . . 
C39 C 0.2550(2) 0.1570(3) 0.84159(13) 0.0412 1.0000 Uani . . . . . . . 
C40 C 0.1305(2) 0.1157(2) 0.87156(11) 0.0354 1.0000 Uani . . . . . . . 
C41 C 0.0805(2) 0.1977(3) 0.92408(12) 0.0433 1.0000 Uani . . . . . . . 
C42 C -0.0305(3) 0.1586(4) 0.95466(15) 0.0552 1.0000 Uani . . . . . . . 
C43 C -0.0916(3) 0.0356(4) 0.9331(2) 0.0647 1.0000 Uani . . . . . . . 
C44 C -0.0426(3) -0.0464(3) 0.8827(2) 0.0667 1.0000 Uani . . . . . . . 
C45 C 0.0681(3) -0.0072(3) 0.85071(17) 0.0512 1.0000 Uani . . . . . . . 
C46 C 0.2264(2) 0.1841(2) 0.67031(13) 0.0415 1.0000 Uani . . . . . . . 
H31 H 0.3961 0.5424 0.4434 0.0520 1.0000 Uiso R . . . . . . 
H33 H 0.3088 0.6259 0.4942 0.0523 1.0000 Uiso R . . . . . . 
H32 H 0.4012 0.5105 0.5325 0.0521 1.0000 Uiso R . . . . . . 
H41 H 0.3424 0.2918 0.4124 0.0599 1.0000 Uiso R . . . . . . 
H43 H 0.2348 0.2230 0.4518 0.0605 1.0000 Uiso R . . . . . . 
H42 H 0.3600 0.2722 0.5023 0.0603 1.0000 Uiso R . . . . . . 
H51 H 0.1893 0.5016 0.3595 0.0633 1.0000 Uiso R . . . . . . 
H53 H 0.0777 0.4045 0.3846 0.0632 1.0000 Uiso R . . . . . . 
H52 H 0.0876 0.5559 0.4140 0.0639 1.0000 Uiso R . . . . . . 
H81 H -0.0342 0.3085 0.6277 0.0352 1.0000 Uiso R . . . . . . 
H82 H -0.0336 0.4681 0.6082 0.0348 1.0000 Uiso R . . . . . . 
H91 H 0.1915 0.4555 0.6746 0.0286 1.0000 Uiso R . . . . . . 
H111 H 0.0063 0.6444 0.6643 0.0382 1.0000 Uiso R . . . . . . 
H112 H 0.0102 0.7002 0.7450 0.0380 1.0000 Uiso R . . . . . . 
H131 H 0.1574 0.7734 0.6037 0.0343 1.0000 Uiso R . . . . . . 
H161 H 0.3220 0.9826 0.4916 0.0569 1.0000 Uiso R . . . . . . 
H163 H 0.2584 0.8401 0.5072 0.0572 1.0000 Uiso R . . . . . . 
H162 H 0.2114 0.9750 0.5445 0.0573 1.0000 Uiso R . . . . . . 
H191 H 0.7192 0.9635 0.7708 0.0898 1.0000 Uiso R . . . . . . 
H193 H 0.6623 0.8287 0.7991 0.0898 1.0000 Uiso R . . . . . . 
H192 H 0.5992 0.9671 0.8154 0.0898 1.0000 Uiso R . . . . . . 
H201 H 0.4606 0.7791 0.8228 0.0421 1.0000 Uiso R . . . . . . 
H211 H 0.2553 0.6699 0.8213 0.0399 1.0000 Uiso R . . . . . . 
H221 H -0.0031 0.3628 0.8031 0.0313 1.0000 Uiso R . . . . . . 
H241 H -0.1693 0.2238 0.7487 0.0427 1.0000 Uiso R . . . . . . 
H251 H -0.3713 0.1788 0.6807 0.0448 1.0000 Uiso R . . . . . . 
H261 H -0.5067 0.3622 0.6284 0.0504 1.0000 Uiso R . . . . . . 
H271 H -0.4282 0.5857 0.6500 0.0515 1.0000 Uiso R . . . . . . 
H281 H -0.2258 0.6274 0.7169 0.0426 1.0000 Uiso R . . . . . . 
H292 H -0.0961 0.4929 0.8872 0.0582 1.0000 Uiso R . . . . . . 
H291 H -0.0929 0.6263 0.8433 0.0581 1.0000 Uiso R . . . . . . 
H293 H 0.0424 0.5621 0.8809 0.0580 1.0000 Uiso R . . . . . . 
H301 H 0.0797 0.2206 0.7327 0.0328 1.0000 Uiso R . . . . . . 
H321 H 0.4227 0.2810 0.7722 0.0435 1.0000 Uiso R . . . . . . 
H322 H 0.3590 0.4309 0.7639 0.0431 1.0000 Uiso R . . . . . . 
H341 H 0.2924 0.4825 0.9129 0.0632 1.0000 Uiso R . . . . . . 
H351 H 0.4105 0.5186 1.0324 0.0848 1.0000 Uiso R . . . . . . 
H361 H 0.6265 0.4573 1.0620 0.0970 1.0000 Uiso R . . . . . . 
H371 H 0.7345 0.3502 0.9711 0.0854 1.0000 Uiso R . . . . . . 
H381 H 0.6180 0.3062 0.8507 0.0709 1.0000 Uiso R . . . . . . 
H391 H 0.2809 0.0878 0.8059 0.0455 1.0000 Uiso R . . . . . . 
H392 H 0.3265 0.1684 0.8836 0.0458 1.0000 Uiso R . . . . . . 
H411 H 0.1244 0.2810 0.9374 0.0450 1.0000 Uiso R . . . . . . 
H421 H -0.0670 0.2147 0.9892 0.0586 1.0000 Uiso R . . . . . . 
H431 H -0.1664 0.0074 0.9526 0.0736 1.0000 Uiso R . . . . . . 
H441 H -0.0876 -0.1283 0.8688 0.0849 1.0000 Uiso R . . . . . . 
H451 H 0.1014 -0.0625 0.8155 0.0624 1.0000 Uiso R . . . . . . 
H462 H 0.2521 0.1004 0.6972 0.0561 1.0000 Uiso R . . . . . . 
H461 H 0.1641 0.1648 0.6264 0.0569 1.0000 Uiso R . . . . . . 
H463 H 0.3061 0.2284 0.6570 0.0564 1.0000 Uiso R . . . . . . 
loop_
_atom_site_aniso_label
_atom_site_aniso_U_11
_atom_site_aniso_U_22
_atom_site_aniso_U_33
_atom_site_aniso_U_23
_atom_site_aniso_U_13
_atom_site_aniso_U_12
O1 0.0328(6) 0.0356(6) 0.0272(6) -0.0044(5) 0.0097(5) -0.0046(6) 
C2 0.0362(9) 0.0294(8) 0.0279(8) 0.0021(7) 0.0117(7) 0.0005(7) 
C3 0.0401(10) 0.0361(10) 0.0488(11) 0.0004(9) 0.0168(9) -0.0049(9) 
C4 0.0489(11) 0.0344(10) 0.0460(11) -0.0014(9) 0.0204(9) 0.0045(9) 
C5 0.0441(10) 0.0567(13) 0.0335(10) 0.0109(9) 0.0031(8) 0.0024(10) 
C6 0.0302(8) 0.0382(9) 0.0251(8) 0.0001(7) 0.0048(6) -0.0032(7) 
O7 0.0445(8) 0.0513(9) 0.0294(6) -0.0086(7) 0.0091(6) -0.0132(7) 
C8 0.0278(7) 0.0424(10) 0.0254(8) -0.0027(7) 0.0071(6) -0.0031(7) 
C9 0.0277(7) 0.0291(9) 0.0233(7) -0.0022(6) 0.0057(6) -0.0029(6) 
N10 0.0323(7) 0.0281(7) 0.0267(7) -0.0013(6) 0.0092(5) -0.0035(6) 
C11 0.0303(8) 0.0295(9) 0.0406(10) 0.0028(8) 0.0080(7) -0.0036(7) 
C12 0.0326(8) 0.0255(8) 0.0357(9) -0.0014(7) 0.0100(7) -0.0025(7) 
C13 0.0328(8) 0.0267(8) 0.0344(9) 0.0002(7) 0.0079(7) -0.0002(7) 
C14 0.0347(9) 0.0301(9) 0.0332(9) 0.0019(7) 0.0096(7) -0.0017(7) 
O15 0.0394(7) 0.0529(10) 0.0400(8) 0.0117(7) 0.0121(6) -0.0053(7) 
C16 0.0528(11) 0.0350(9) 0.0337(9) 0.0051(8) 0.0124(8) 0.0004(9) 
C17 0.0332(9) 0.0332(9) 0.0407(10) -0.0011(8) 0.0088(7) -0.0053(8) 
O18 0.0362(7) 0.0562(10) 0.0452(8) 0.0033(7) 0.0044(6) -0.0165(7) 
C19 0.0483(12) 0.076(2) 0.0545(14) 0.0091(14) -0.0023(10) -0.0244(14) 
C20 0.0397(10) 0.0440(11) 0.0349(10) -0.0015(9) 0.0025(7) -0.0076(9) 
C21 0.0412(10) 0.0390(10) 0.0326(9) 0.0015(8) 0.0079(7) -0.0090(8) 
C22 0.0343(8) 0.0324(9) 0.0272(8) -0.0024(7) 0.0094(6) -0.0032(7) 
C23 0.0321(8) 0.0331(9) 0.0281(8) -0.0019(7) 0.0120(6) -0.0034(7) 
C24 0.0355(9) 0.0355(10) 0.0393(10) -0.0030(8) 0.0139(8) -0.0043(8) 
C25 0.0439(10) 0.0440(12) 0.0407(10) -0.0069(9) 0.0148(8) -0.0144(9) 
C26 0.0349(9) 0.0677(16) 0.0355(10) 0.0016(10) 0.0077(8) -0.0144(10) 
C27 0.0371(10) 0.0556(14) 0.0482(12) 0.0142(11) 0.0109(9) -0.0016(10) 
C28 0.0350(9) 0.0381(10) 0.0428(10) 0.0018(8) 0.0115(8) -0.0042(8) 
C29 0.0470(10) 0.0509(12) 0.0307(9) -0.0121(9) 0.0150(8) -0.0094(10) 
C30 0.0297(8) 0.0310(9) 0.0305(8) -0.0011(7) 0.0048(6) -0.0006(7) 
N31 0.0285(7) 0.0404(9) 0.0283(7) 0.0058(7) 0.0049(6) -0.0007(7) 
C32 0.0291(8) 0.0557(12) 0.0331(9) 0.0002(9) 0.0076(7) -0.0039(9) 
C33 0.0370(10) 0.0609(14) 0.0377(11) -0.0049(10) 0.0092(8) -0.0086(10) 
C34 0.0538(13) 0.0607(16) 0.0496(13) -0.0121(12) 0.0186(10) -0.0097(12) 
C35 0.0673(17) 0.073(2) 0.0638(17) -0.0189(16) 0.0167(14) -0.0098(16) 
C36 0.0680(18) 0.088(2) 0.0647(19) -0.0197(19) -0.0064(14) -0.0195(19) 
C37 0.0406(12) 0.104(3) 0.080(2) -0.013(2) -0.0034(13) -0.0053(17) 
C38 0.0377(11) 0.084(2) 0.0640(16) -0.0144(16) 0.0104(10) -0.0032(13) 
C39 0.0383(9) 0.0439(12) 0.0415(10) 0.0111(9) 0.0062(8) 0.0051(9) 
C40 0.0371(9) 0.0371(10) 0.0315(8) 0.0105(8) 0.0026(7) 0.0025(8) 
C41 0.0491(11) 0.0501(13) 0.0308(9) 0.0046(9) 0.0063(8) -0.0002(10) 
C42 0.0585(14) 0.0694(18) 0.0413(11) 0.0171(12) 0.0191(10) 0.0072(13) 
C43 0.0459(12) 0.073(2) 0.0770(19) 0.0374(17) 0.0150(12) -0.0010(13) 
C44 0.0509(14) 0.0503(16) 0.095(2) 0.0160(16) -0.0021(15) -0.0102(12) 
C45 0.0530(13) 0.0399(11) 0.0593(14) 0.0002(11) 0.0035(11) 0.0022(11) 
C46 0.0477(11) 0.0377(11) 0.0395(10) -0.0076(9) 0.0073(8) 0.0076(9) 

_refine_ls_extinction_method 
    'None'
_oxford_refine_ls_scale 7.9(3) 
loop_
 _geom_bond_atom_site_label_1
 _geom_bond_site_symmetry_1
 _geom_bond_atom_site_label_2
 _geom_bond_site_symmetry_2
 _geom_bond_distance
 _geom_bond_publ_flag
O1 . C2 . 1.486(2)    yes
O1 . C6 . 1.343(2)    yes
C2 . C3 . 1.525(3)    yes
C2 . C4 . 1.519(3)    yes
C2 . C5 . 1.521(3)    yes
C3 . H31 . 0.961    no
C3 . H33 . 0.967    no
C3 . H32 . 0.968    no
C4 . H41 . 0.975    no
C4 . H43 . 0.937    no
C4 . H42 . 0.977    no
C5 . H51 . 0.998    no
C5 . H53 . 0.980    no
C5 . H52 . 0.977    no
C6 . O7 . 1.208(3)    yes
C6 . C8 . 1.511(2)    yes
C8 . C9 . 1.567(2)    yes
C8 . H81 . 0.955    no
C8 . H82 . 0.963    no
C9 . N10 . 1.460(2)    yes
C9 . C30 . 1.540(3)    yes
C9 . H91 . 0.963    no
N10 . C11 . 1.464(2)    yes
N10 . C22 . 1.477(2)    yes
C11 . C12 . 1.516(3)    yes
C11 . H111 . 0.960    no
C11 . H112 . 0.934    no
C12 . C13 . 1.396(3)    yes
C12 . C21 . 1.382(3)    yes
C13 . C14 . 1.396(3)    yes
C13 . H131 . 0.960    no
C14 . O15 . 1.362(2)    yes
C14 . C17 . 1.407(3)    yes
O15 . C16 . 1.421(3)    yes
C16 . H161 . 0.945    no
C16 . H163 . 0.948    no
C16 . H162 . 0.959    no
C17 . O18 . 1.379(2)    yes
C17 . C20 . 1.383(3)    yes
O18 . C19 . 1.418(3)    yes
C19 . H191 . 0.970    no
C19 . H193 . 0.964    no
C19 . H192 . 0.956    no
C20 . C21 . 1.405(3)    yes
C20 . H201 . 0.916    no
C21 . H211 . 0.935    no
C22 . C23 . 1.519(3)    yes
C22 . C29 . 1.527(3)    yes
C22 . H221 . 0.984    no
C23 . C24 . 1.395(3)    yes
C23 . C28 . 1.400(3)    yes
C24 . C25 . 1.397(3)    yes
C24 . H241 . 0.919    no
C25 . C26 . 1.391(4)    yes
C25 . H251 . 0.937    no
C26 . C27 . 1.384(4)    yes
C26 . H261 . 0.973    no
C27 . C28 . 1.390(3)    yes
C27 . H271 . 0.936    no
C28 . H281 . 0.930    no
C29 . H292 . 0.971    no
C29 . H291 . 0.971    no
C29 . H293 . 0.982    no
C30 . N31 . 1.483(2)    yes
C30 . C46 . 1.534(3)    yes
C30 . H301 . 0.986    no
N31 . C32 . 1.465(3)    yes
N31 . C39 . 1.477(3)    yes
C32 . C33 . 1.495(3)    yes
C32 . H321 . 0.977    no
C32 . H322 . 0.981    no
C33 . C34 . 1.398(3)    yes
C33 . C38 . 1.399(3)    yes
C34 . C35 . 1.409(4)    yes
C34 . H341 . 0.938    no
C35 . C36 . 1.406(5)    yes
C35 . H351 . 0.911    no
C36 . C37 . 1.384(6)    yes
C36 . H361 . 0.921    no
C37 . C38 . 1.398(4)    yes
C37 . H371 . 0.966    no
C38 . H381 . 0.954    no
C39 . C40 . 1.510(3)    yes
C39 . H391 . 0.993    no
C39 . H392 . 0.982    no
C40 . C41 . 1.390(3)    yes
C40 . C45 . 1.386(3)    yes
C41 . C42 . 1.386(4)    yes
C41 . H411 . 0.944    no
C42 . C43 . 1.385(5)    yes
C42 . H421 . 0.944    no
C43 . C44 . 1.357(6)    yes
C43 . H431 . 0.930    no
C44 . C45 . 1.398(5)    yes
C44 . H441 . 0.938    no
C45 . H451 . 0.932    no
C46 . H462 . 0.967    no
C46 . H461 . 0.962    no
C46 . H463 . 0.984    no
loop_
 _geom_angle_atom_site_label_1
 _geom_angle_site_symmetry_1
 _geom_angle_atom_site_label_2
 _geom_angle_site_symmetry_2
 _geom_angle_atom_site_label_3
 _geom_angle_site_symmetry_3
 _geom_angle
 _geom_angle_publ_flag
C2 . O1 . C6 . 120.80(15)    yes
O1 . C2 . C3 . 101.83(15)    yes
O1 . C2 . C4 . 110.67(15)    yes
C3 . C2 . C4 . 110.22(17)    yes
O1 . C2 . C5 . 109.09(16)    yes
C3 . C2 . C5 . 111.25(19)    yes
C4 . C2 . C5 . 113.20(19)    yes
C2 . C3 . H31 . 107.2    no
C2 . C3 . H33 . 108.3    no
H31 . C3 . H33 . 111.2    no
C2 . C3 . H32 . 107.0    no
H31 . C3 . H32 . 114.7    no
H33 . C3 . H32 . 108.2    no
C2 . C4 . H41 . 110.5    no
C2 . C4 . H43 . 112.4    no
H41 . C4 . H43 . 108.0    no
C2 . C4 . H42 . 107.2    no
H41 . C4 . H42 . 111.5    no
H43 . C4 . H42 . 107.3    no
C2 . C5 . H51 . 107.9    no
C2 . C5 . H53 . 112.1    no
H51 . C5 . H53 . 107.9    no
C2 . C5 . H52 . 112.6    no
H51 . C5 . H52 . 109.9    no
H53 . C5 . H52 . 106.5    no
O1 . C6 . O7 . 125.06(17)    yes
O1 . C6 . C8 . 111.25(16)    yes
O7 . C6 . C8 . 123.64(17)    yes
C6 . C8 . C9 . 117.63(14)    yes
C6 . C8 . H81 . 108.5    no
C9 . C8 . H81 . 104.4    no
C6 . C8 . H82 . 108.4    no
C9 . C8 . H82 . 105.3    no
H81 . C8 . H82 . 112.6    no
C8 . C9 . N10 . 113.86(14)    yes
C8 . C9 . C30 . 109.26(15)    yes
N10 . C9 . C30 . 113.03(14)    yes
C8 . C9 . H91 . 106.7    no
N10 . C9 . H91 . 104.9    no
C30 . C9 . H91 . 108.7    no
C9 . N10 . C11 . 112.83(14)    yes
C9 . N10 . C22 . 117.19(14)    yes
C11 . N10 . C22 . 117.62(16)    yes
N10 . C11 . C12 . 111.68(16)    yes
N10 . C11 . H111 . 108.9    no
C12 . C11 . H111 . 110.3    no
N10 . C11 . H112 . 111.1    no
C12 . C11 . H112 . 105.6    no
H111 . C11 . H112 . 109.2    no
C11 . C12 . C13 . 120.56(18)    yes
C11 . C12 . C21 . 120.07(18)    yes
C13 . C12 . C21 . 119.36(18)    yes
C12 . C13 . C14 . 120.61(18)    yes
C12 . C13 . H131 . 119.7    no
C14 . C13 . H131 . 119.6    no
C13 . C14 . O15 . 125.10(18)    yes
C13 . C14 . C17 . 119.41(17)    yes
O15 . C14 . C17 . 115.48(17)    yes
C14 . O15 . C16 . 117.13(16)    yes
O15 . C16 . H161 . 107.1    no
O15 . C16 . H163 . 106.2    no
H161 . C16 . H163 . 113.0    no
O15 . C16 . H162 . 105.1    no
H161 . C16 . H162 . 112.4    no
H163 . C16 . H162 . 112.2    no
C14 . C17 . O18 . 115.40(18)    yes
C14 . C17 . C20 . 120.13(18)    yes
O18 . C17 . C20 . 124.47(19)    yes
C17 . O18 . C19 . 116.43(18)    yes
O18 . C19 . H191 . 112.3    no
O18 . C19 . H193 . 112.4    no
H191 . C19 . H193 . 106.9    no
O18 . C19 . H192 . 109.5    no
H191 . C19 . H192 . 108.3    no
H193 . C19 . H192 . 107.1    no
C17 . C20 . C21 . 119.63(19)    yes
C17 . C20 . H201 . 119.5    no
C21 . C20 . H201 . 120.9    no
C20 . C21 . C12 . 120.86(19)    yes
C20 . C21 . H211 . 121.1    no
C12 . C21 . H211 . 118.0    no
N10 . C22 . C23 . 116.71(15)    yes
N10 . C22 . C29 . 110.80(16)    yes
C23 . C22 . C29 . 111.06(16)    yes
N10 . C22 . H221 . 103.8    no
C23 . C22 . H221 . 107.1    no
C29 . C22 . H221 . 106.5    no
C22 . C23 . C24 . 119.49(18)    yes
C22 . C23 . C28 . 122.97(19)    yes
C24 . C23 . C28 . 117.53(18)    yes
C23 . C24 . C25 . 121.6(2)    yes
C23 . C24 . H241 . 119.6    no
C25 . C24 . H241 . 118.8    no
C24 . C25 . C26 . 119.6(2)    yes
C24 . C25 . H251 . 119.2    no
C26 . C25 . H251 . 121.2    no
C25 . C26 . C27 . 119.7(2)    yes
C25 . C26 . H261 . 120.9    no
C27 . C26 . H261 . 119.3    no
C26 . C27 . C28 . 120.3(2)    yes
C26 . C27 . H271 . 120.7    no
C28 . C27 . H271 . 119.0    no
C23 . C28 . C27 . 121.3(2)    yes
C23 . C28 . H281 . 120.3    no
C27 . C28 . H281 . 118.4    no
C22 . C29 . H292 . 109.3    no
C22 . C29 . H291 . 114.3    no
H292 . C29 . H291 . 103.5    no
C22 . C29 . H293 . 111.6    no
H292 . C29 . H293 . 109.3    no
H291 . C29 . H293 . 108.6    no
C9 . C30 . N31 . 112.01(15)    yes
C9 . C30 . C46 . 110.55(16)    yes
N31 . C30 . C46 . 113.64(16)    yes
C9 . C30 . H301 . 107.3    no
N31 . C30 . H301 . 107.5    no
C46 . C30 . H301 . 105.4    no
C30 . N31 . C32 . 112.53(15)    yes
C30 . N31 . C39 . 111.65(17)    yes
C32 . N31 . C39 . 110.41(17)    yes
N31 . C32 . C33 . 112.20(17)    yes
N31 . C32 . H321 . 108.6    no
C33 . C32 . H321 . 107.5    no
N31 . C32 . H322 . 109.6    no
C33 . C32 . H322 . 109.1    no
H321 . C32 . H322 . 109.7    no
C32 . C33 . C34 . 121.1(2)    yes
C32 . C33 . C38 . 119.8(2)    yes
C34 . C33 . C38 . 119.1(2)    yes
C33 . C34 . C35 . 119.2(3)    yes
C33 . C34 . H341 . 121.4    no
C35 . C34 . H341 . 119.3    no
C34 . C35 . C36 . 121.8(3)    yes
C34 . C35 . H351 . 121.1    no
C36 . C35 . H351 . 117.0    no
C35 . C36 . C37 . 117.6(3)    yes
C35 . C36 . H361 . 120.4    no
C37 . C36 . H361 . 121.9    no
C36 . C37 . C38 . 121.5(3)    yes
C36 . C37 . H371 . 119.2    no
C38 . C37 . H371 . 119.3    no
C33 . C38 . C37 . 120.6(3)    yes
C33 . C38 . H381 . 118.5    no
C37 . C38 . H381 . 120.9    no
N31 . C39 . C40 . 112.38(17)    yes
N31 . C39 . H391 . 106.2    no
C40 . C39 . H391 . 111.4    no
N31 . C39 . H392 . 107.6    no
C40 . C39 . H392 . 109.6    no
H391 . C39 . H392 . 109.5    no
C39 . C40 . C41 . 120.0(2)    yes
C39 . C40 . C45 . 121.1(2)    yes
C41 . C40 . C45 . 118.8(2)    yes
C40 . C41 . C42 . 120.9(3)    yes
C40 . C41 . H411 . 117.3    no
C42 . C41 . H411 . 121.8    no
C41 . C42 . C43 . 119.5(3)    yes
C41 . C42 . H421 . 121.7    no
C43 . C42 . H421 . 118.8    no
C42 . C43 . C44 . 120.2(2)    yes
C42 . C43 . H431 . 121.1    no
C44 . C43 . H431 . 118.7    no
C43 . C44 . C45 . 120.8(3)    yes
C43 . C44 . H441 . 117.7    no
C45 . C44 . H441 . 121.5    no
C44 . C45 . C40 . 119.8(3)    yes
C44 . C45 . H451 . 121.1    no
C40 . C45 . H451 . 119.0    no
C30 . C46 . H462 . 105.2    no
C30 . C46 . H461 . 109.4    no
H462 . C46 . H461 . 110.3    no
C30 . C46 . H463 . 111.9    no
H462 . C46 . H463 . 108.3    no
H461 . C46 . H463 . 111.5    no
loop_
 _geom_hbond_atom_site_label_D
 _geom_hbond_site_symmetry_D
 _geom_hbond_atom_site_label_H
 _geom_hbond_site_symmetry_H
 _geom_hbond_atom_site_label_A
 _geom_hbond_site_symmetry_A
 _geom_hbond_angle_DHA
 _geom_hbond_distance_DH
 _geom_hbond_distance_HA
 _geom_hbond_distance_DA
 _geom_hbond_publ_flag
C13 . H131 . O7 2_556 171 0.96 2.48 3.427(4)    yes

#==============================================================================
data_70 
_ccdc_journal_depnumber            '852577'
#==============================================================================

_cell_length_a                    13.5392(6)
_cell_length_b                    6.7124(4)
_cell_length_c                    20.4694(10)
_cell_angle_alpha                 90
_cell_angle_beta                  90
_cell_angle_gamma                 90
_cell_volume                      1860.27(17)
 
_symmetry_cell_setting            'Orthorhombic' 
_symmetry_space_group_name_H-M    'P b c a ' 
_symmetry_space_group_name_Hall   '-P 2ac 2ab' 
loop_
 _symmetry_equiv_pos_as_xyz
 'x,y,z'
 '-x,-y,-z'
 '-x+1/2,y+1/2,z'
 'x+1/2,-y+1/2,-z'
 'x,-y+1/2,z+1/2'
 '-x,y+1/2,-z+1/2'
 '-x+1/2,-y,z+1/2'
 'x+1/2,y,-z+1/2'

loop_
_atom_type_symbol
_atom_type_scat_dispersion_real
_atom_type_scat_dispersion_imag
_atom_type_scat_Cromer_Mann_a1
_atom_type_scat_Cromer_Mann_b1
_atom_type_scat_Cromer_Mann_a2
_atom_type_scat_Cromer_Mann_b2
_atom_type_scat_Cromer_Mann_a3
_atom_type_scat_Cromer_Mann_b3
_atom_type_scat_Cromer_Mann_a4
_atom_type_scat_Cromer_Mann_b4
_atom_type_scat_Cromer_Mann_c
_atom_type_scat_source  
 C       0.0181   0.0091   2.3100  20.8439   1.0200  10.2075   1.5886   0.5687
   0.8650  51.6512   0.2156 'International Tables Vol C 4.2.6.8 and 6.1.1.4'
 H       0.0000   0.0000   0.4930  10.5109   0.3229  26.1257   0.1402   3.1424
   0.0408  57.7998   0.0030 'International Tables Vol C 4.2.6.8 and 6.1.1.4'
 N       0.0311   0.0180  12.2126   0.0057   3.1322   9.8933   2.0125  28.9975
   1.1663   0.5826 -11.5290 'International Tables Vol C 4.2.6.8 and 6.1.1.4'
 O       0.0492   0.0322   3.0485  13.2771   2.2868   5.7011   1.5463   0.3239
   0.8670  32.9089   0.2508 'International Tables Vol C 4.2.6.8 and 6.1.1.4'
 
_cell_formula_units_Z                    8

# Given Formula = C8 H16 N2 O2 
# Dc =      1.23 Fooo =    752.00 Mu =      7.24 M =    172.23
# Found Formula = C8 H16 N2 O2 
# Dc =      1.23 FOOO =    752.00 Mu =      7.24 M =    172.23

_chemical_formula_sum             'C8 H16 N2 O2'
_chemical_formula_moiety          'C8 H16 N2 O2'
_chemical_compound_source                .
_chemical_formula_weight            172.23
 
_cell_measurement_reflns_used         1911
_cell_measurement_theta_min              3
_cell_measurement_theta_max             76
_cell_measurement_temperature          150
 
_exptl_crystal_description        'plate' 
_exptl_crystal_colour             'colourless' 
_exptl_crystal_size_min           0.040 
_exptl_crystal_size_mid           0.160 
_exptl_crystal_size_max           0.190 
 
_exptl_crystal_density_diffrn     1.230 
_exptl_crystal_density_meas       . 
_exptl_crystal_density_method     'not measured' 
# Non-dispersive F(000): 
_exptl_crystal_F_000              752 
_exptl_absorpt_coefficient_mu     0.724 
 
# Sheldrick geometric approximatio 0.89 0.97 
_exptl_absorpt_correction_type    multi-scan 
_exptl_absorpt_process_details    'CrysAlis, (Oxford Diffraction, 2002)' 
_exptl_absorpt_correction_T_min   0.77 
_exptl_absorpt_correction_T_max   0.97 
_diffrn_measurement_device_type   'Oxford Diffraction SuperNova' 
_diffrn_measurement_device        'Area' 
_diffrn_radiation_monochromator   'graphite' 
_diffrn_radiation_type            'Cu K\a'
_diffrn_radiation_wavelength           1.54180
_diffrn_measurement_method        \w 
 
# If a reference occurs more than once, delete the author 
# and date from subsequent references. 
_computing_data_collection        'SuperNova, (Oxford Diffraction, 2010)' 
_computing_cell_refinement        'CrysAlis, (Oxford Diffraction, 2002)' 
_computing_data_reduction         'CrysAlis, (Oxford Diffraction, 2002)' 
_computing_structure_solution     'SIR92 (Altomare et al., 1994)' 
_computing_structure_refinement   'CRYSTALS (Betteridge et al., 2003)' 
_computing_publication_material   'CRYSTALS (Betteridge et al., 2003)' 
_computing_molecular_graphics     'CAMERON (Watkin et al., 1996)' 
 
_diffrn_standards_interval_time   . 
_diffrn_standards_interval_count  . 
_diffrn_standards_number          0 
_diffrn_standards_decay_%         . 
 
_diffrn_ambient_temperature        150
_diffrn_reflns_number             4781 
_reflns_number_total              1911 
_diffrn_reflns_av_R_equivalents   0.032 
# Number of reflections without Friedels Law is 0 
# Number of reflections with Friedels Law is 1911 
# Theoretical number of reflections is about 3894 
 
_diffrn_reflns_theta_min          4.320 
_diffrn_reflns_theta_max          76.200 
_diffrn_measured_fraction_theta_max 0.983 
 
_diffrn_reflns_theta_full         75.120 
_diffrn_measured_fraction_theta_full 0.991 
 
_diffrn_reflns_limit_h_min        -16 
_diffrn_reflns_limit_h_max        14 
_diffrn_reflns_limit_k_min        -5 
_diffrn_reflns_limit_k_max        8 
_diffrn_reflns_limit_l_min        -25 
_diffrn_reflns_limit_l_max        24 
_reflns_limit_h_min               0 
_reflns_limit_h_max               16 
_reflns_limit_k_min               0 
_reflns_limit_k_max               8 
_reflns_limit_l_min               0 
_reflns_limit_l_max               25 
 
_oxford_diffrn_Wilson_B_factor    2.15 
_oxford_diffrn_Wilson_scale       0.01 
 
_atom_sites_solution_primary      Direct #heavy,direct,difmap,geom
# _atom_sites_solution_secondary  difmap
_atom_sites_solution_hydrogens    difmap
 
_refine_diff_density_min          -0.46 
_refine_diff_density_max          0.44 
 
# The current dictionary definitions do not cover the 
# situation where the reflections used for refinement were 
# selected by a user-defined sigma threshold 
 
# The values actually used during refinement 
_oxford_reflns_threshold_expression_ref     I>-3.0\s(I)
_refine_ls_number_reflns          1911 
_refine_ls_number_restraints      0 
_refine_ls_number_parameters      109 
_oxford_refine_ls_R_factor_ref    0.0708 
_refine_ls_wR_factor_ref          0.1994 
_refine_ls_goodness_of_fit_ref    1.1802 
_refine_ls_shift/su_max           0.0002210 
_refine_ls_shift/su_mean          0.0000209 
 
# The values computed from all data 
_oxford_reflns_number_all         1911 
_refine_ls_R_factor_all           0.0708 
_refine_ls_wR_factor_all          0.1994 
 
# The values computed with a 2 sigma cutoff - a la SHELX 
_reflns_threshold_expression      I>2.0\s(I)
_reflns_number_gt                 1574 
_refine_ls_R_factor_gt            0.0608 
_refine_ls_wR_factor_gt           0.1944 
 
# choose from: rm (reference molecule of known chirality), 
# ad (anomolous dispersion - Flack), rmad (rm and ad), 
# syn (from synthesis), unk (unknown) or . (not applicable). 
_chemical_absolute_configuration  '.' 
 
_refine_ls_structure_factor_coef  Fsqd 
_refine_ls_matrix_type            full
_refine_ls_hydrogen_treatment     constr         # none, undef, noref, refall,
                                                 # refxyz, refU, constr or mixed
_refine_ls_weighting_scheme       calc 
_refine_ls_weighting_details 
;
 Method= Modified Sheldrick 
 w=1/[\s^2^(F^2^) + ( 0.05P)^2^ + 5.80P] 
 ,where P=(max(Fo^2^,0) + 2Fc^2^)/3 
;
# Insert your own references if required - in alphabetical order 
_publ_section_references 
; 
Oxford Diffraction, (2010). CrysAlisPro. 
 
Oxford Diffraction, (2010). Supernova User Manual. 
 
Betteridge, P.W., Carruthers, J.R., Cooper, R.I., 
Prout, K. & Watkin, D.J. (2003). J. Appl. Cryst. 36, 1487. 
 
Watkin, D.J., Prout, C.K. & Pearce, L.J. (1996). CAMERON, Chemical 
Crystallography Laboratory, Oxford, UK. 
 
Altomare, A., Cascarano, G., Giacovazzo, C., Guagliardi, A., Burla, M.C., 
Polidori, G. & Camalli, M. (1994). J. Appl. Cryst. 27, 435. 
; 

# Uequiv = arithmetic mean of Ui i.e. Ueqiv = (U1+U2+U3)/3

# Replace last . with number of unfound hydrogen atoms attached to an atom.

# ..._refinement_flags_... 
# . no refinement constraints           S special position constraint on site
# G rigid group refinement of site      R riding atom
# D distance or angle restraint on site T thermal displacement constraints
# U Uiso or Uij restraint (rigid bond)  P partial occupancy constraint

loop_
_atom_site_label
_atom_site_type_symbol
_atom_site_fract_x
_atom_site_fract_y
_atom_site_fract_z
_atom_site_U_iso_or_equiv
_atom_site_occupancy
_atom_site_adp_type
_atom_site_refinement_flags_posn
_atom_site_refinement_flags_adp
_atom_site_refinement_flags_occupancy
_atom_site_disorder_assembly
_atom_site_disorder_group
_atom_site_attached_hydrogens
O1 O 0.61707(17) 0.4463(4) 0.77299(11) 0.0271 1.0000 Uani . . . . . . 
C2 C 0.6050(2) 0.6565(5) 0.77587(15) 0.0239 1.0000 Uani . . . . . . 
C3 C 0.6372(2) 0.7544(5) 0.71262(15) 0.0203 1.0000 Uani . . . . . . 
N4 N 0.74254(19) 0.7261(4) 0.69939(13) 0.0220 1.0000 Uani . . . . . . 
C5 C 0.7642(2) 0.6695(5) 0.63828(15) 0.0225 1.0000 Uani . . . . . . 
O6 O 0.84874(17) 0.6471(4) 0.61641(12) 0.0294 1.0000 Uani . . . . . . 
C7 C 0.6697(2) 0.6434(5) 0.60024(15) 0.0240 1.0000 Uani . . . . . . 
C8 C 0.5861(2) 0.6717(5) 0.65060(15) 0.0207 1.0000 Uani . . . . . . 
N9 N 0.50688(19) 0.8079(4) 0.63062(12) 0.0217 1.0000 Uani . . . . . . 
C10 C 0.4501(2) 0.7433(6) 0.57245(16) 0.0280 1.0000 Uani . . . . . . 
C11 C 0.3843(3) 0.9157(7) 0.55191(19) 0.0437 1.0000 Uani . . . . . . 
C12 C 0.3909(3) 0.5575(8) 0.5877(2) 0.0472 1.0000 Uani . . . . . . 
H21 H 0.6435 0.7103 0.8132 0.0291 1.0000 Uiso R . . . . . 
H22 H 0.5343 0.6866 0.7831 0.0294 1.0000 Uiso R . . . . . 
H31 H 0.6207 0.9009 0.7167 0.0245 1.0000 Uiso R . . . . . 
H71 H 0.6652 0.7469 0.5661 0.0305 1.0000 Uiso R . . . . . 
H72 H 0.6663 0.5108 0.5795 0.0308 1.0000 Uiso R . . . . . 
H81 H 0.5561 0.5407 0.6623 0.0265 1.0000 Uiso R . . . . . 
H101 H 0.4956 0.7150 0.5349 0.0327 1.0000 Uiso R . . . . . 
H111 H 0.3529 0.8795 0.5111 0.0668 1.0000 Uiso R . . . . . 
H112 H 0.3358 0.9365 0.5853 0.0669 1.0000 Uiso R . . . . . 
H113 H 0.4239 1.0341 0.5452 0.0671 1.0000 Uiso R . . . . . 
H121 H 0.3516 0.5285 0.5493 0.0744 1.0000 Uiso R . . . . . 
H122 H 0.3502 0.5819 0.6254 0.0738 1.0000 Uiso R . . . . . 
H123 H 0.4357 0.4479 0.5962 0.0742 1.0000 Uiso R . . . . . 
H91 H 0.5344 0.9237 0.6212 0.0278 1.0000 Uiso R . . . . . 
H41 H 0.7860 0.7776 0.7240 0.0274 1.0000 Uiso R . . . . . 
H11 H 0.5833 0.3919 0.8024 0.0423 1.0000 Uiso R . . . . . 
loop_
_atom_site_aniso_label
_atom_site_aniso_U_11
_atom_site_aniso_U_22
_atom_site_aniso_U_33
_atom_site_aniso_U_23
_atom_site_aniso_U_13
_atom_site_aniso_U_12
O1 0.0302(12) 0.0230(12) 0.0281(12) 0.0038(10) 0.0100(10) 0.0023(10) 
C2 0.0252(15) 0.0240(16) 0.0227(15) -0.0009(13) 0.0031(12) 0.0007(14) 
C3 0.0172(14) 0.0212(15) 0.0225(15) -0.0009(12) -0.0001(11) -0.0022(12) 
N4 0.0169(12) 0.0236(13) 0.0253(12) -0.0009(11) -0.0005(10) -0.0021(11) 
C5 0.0229(15) 0.0193(15) 0.0253(15) 0.0033(12) 0.0005(12) 0.0009(13) 
O6 0.0231(11) 0.0308(13) 0.0345(13) 0.0043(11) 0.0069(10) 0.0064(10) 
C7 0.0247(15) 0.0254(17) 0.0218(15) -0.0013(13) -0.0001(12) 0.0045(14) 
C8 0.0206(14) 0.0202(15) 0.0212(15) 0.0008(12) 0.0000(12) -0.0009(12) 
N9 0.0180(12) 0.0241(13) 0.0231(13) 0.0003(11) -0.0014(10) -0.0014(11) 
C10 0.0219(15) 0.042(2) 0.0202(15) -0.0015(14) -0.0014(12) -0.0042(15) 
C11 0.035(2) 0.065(3) 0.0306(19) -0.0025(19) -0.0089(16) 0.016(2) 
C12 0.044(2) 0.060(3) 0.038(2) -0.003(2) -0.0076(18) -0.025(2) 

_refine_ls_extinction_method 
    'None'
_oxford_refine_ls_scale 8.3(6) 
loop_
 _geom_bond_atom_site_label_1
 _geom_bond_site_symmetry_1
 _geom_bond_atom_site_label_2
 _geom_bond_site_symmetry_2
 _geom_bond_distance
 _geom_bond_publ_flag
O1 . C2 . 1.422(4)    yes
O1 . H11 . 0.839    no
C2 . C3 . 1.516(4)    yes
C2 . H21 . 0.992    no
C2 . H22 . 0.989    no
C3 . N4 . 1.464(4)    yes
C3 . C8 . 1.549(4)    yes
C3 . H31 . 1.012    no
N4 . C5 . 1.340(4)    yes
N4 . H41 . 0.848    no
C5 . O6 . 1.238(4)    yes
C5 . C7 . 1.508(4)    yes
C7 . C8 . 1.543(4)    yes
C7 . H71 . 0.988    no
C7 . H72 . 0.987    no
C8 . N9 . 1.467(4)    yes
C8 . H81 . 0.998    no
N9 . C10 . 1.483(4)    yes
N9 . H91 . 0.884    no
C10 . C11 . 1.520(5)    yes
C10 . C12 . 1.515(6)    yes
C10 . H101 . 1.004    no
C11 . H111 . 0.967    no
C11 . H112 . 0.958    no
C11 . H113 . 0.969    no
C12 . H121 . 0.968    no
C12 . H122 . 0.964    no
C12 . H123 . 0.969    no
loop_
 _geom_angle_atom_site_label_1
 _geom_angle_site_symmetry_1
 _geom_angle_atom_site_label_2
 _geom_angle_site_symmetry_2
 _geom_angle_atom_site_label_3
 _geom_angle_site_symmetry_3
 _geom_angle
 _geom_angle_publ_flag
C2 . O1 . H11 . 109.8    no
O1 . C2 . C3 . 111.2(3)    yes
O1 . C2 . H21 . 109.4    no
C3 . C2 . H21 . 110.4    no
O1 . C2 . H22 . 108.7    no
C3 . C2 . H22 . 108.5    no
H21 . C2 . H22 . 108.6    no
C2 . C3 . N4 . 112.4(3)    yes
C2 . C3 . C8 . 114.6(3)    yes
N4 . C3 . C8 . 103.7(2)    yes
C2 . C3 . H31 . 106.7    no
N4 . C3 . H31 . 110.9    no
C8 . C3 . H31 . 108.5    no
C3 . N4 . C5 . 115.0(3)    yes
C3 . N4 . H41 . 120.9    no
C5 . N4 . H41 . 121.2    no
N4 . C5 . O6 . 125.1(3)    yes
N4 . C5 . C7 . 109.2(3)    yes
O6 . C5 . C7 . 125.7(3)    yes
C5 . C7 . C8 . 105.3(2)    yes
C5 . C7 . H71 . 109.6    no
C8 . C7 . H71 . 110.0    no
C5 . C7 . H72 . 111.4    no
C8 . C7 . H72 . 111.3    no
H71 . C7 . H72 . 109.1    no
C7 . C8 . C3 . 105.3(2)    yes
C7 . C8 . N9 . 115.3(3)    yes
C3 . C8 . N9 . 109.4(3)    yes
C7 . C8 . H81 . 110.5    no
C3 . C8 . H81 . 107.6    no
N9 . C8 . H81 . 108.6    no
C8 . N9 . C10 . 114.9(3)    yes
C8 . N9 . H91 . 107.5    no
C10 . N9 . H91 . 107.5    no
N9 . C10 . C11 . 107.7(3)    yes
N9 . C10 . C12 . 110.5(3)    yes
C11 . C10 . C12 . 112.0(3)    yes
N9 . C10 . H101 . 110.6    no
C11 . C10 . H101 . 107.0    no
C12 . C10 . H101 . 109.0    no
C10 . C11 . H111 . 107.7    no
C10 . C11 . H112 . 108.4    no
H111 . C11 . H112 . 110.7    no
C10 . C11 . H113 . 109.8    no
H111 . C11 . H113 . 109.1    no
H112 . C11 . H113 . 111.1    no
C10 . C12 . H121 . 106.9    no
C10 . C12 . H122 . 109.1    no
H121 . C12 . H122 . 111.7    no
C10 . C12 . H123 . 109.4    no
H121 . C12 . H123 . 109.7    no
H122 . C12 . H123 . 110.0    no
loop_
 _geom_hbond_atom_site_label_D
 _geom_hbond_site_symmetry_D
 _geom_hbond_atom_site_label_H
 _geom_hbond_site_symmetry_H
 _geom_hbond_atom_site_label_A
 _geom_hbond_site_symmetry_A
 _geom_hbond_angle_DHA
 _geom_hbond_distance_DH
 _geom_hbond_distance_HA
 _geom_hbond_distance_DA
 _geom_hbond_publ_flag
C7 . H72 . O6 3_645 137.41(9) 0.987 2.563 3.357(5)    yes
N9 . H91 . O6 3_655 156.95(9) 0.884 2.182 3.015(5)    yes
N4 . H41 . O1 3_655 169.26(10) 0.848 2.002 2.840(5)    yes
O1 . H11 . N9 6_646 170.35(11) 0.839 1.921 2.752(5)    yes

_iucr_refine_instruction_details_constraints
;
#
# Punched on 24/11/11 at 14:27:42
#
#LIST     12                                                                    
BLOCK SCALE X'S, U'S 
RIDE O   (   1,X'S) H   (  11,X'S) 
RIDE C   (   2,X'S) H   (  21,X'S) H   (  22,X'S) 
RIDE C   (   3,X'S) H   (  31,X'S) 
RIDE N   (   4,X'S) H   (  41,X'S) 
RIDE C   (   7,X'S) H   (  71,X'S) H   (  72,X'S) 
RIDE C   (   8,X'S) H   (  81,X'S) 
RIDE N   (   9,X'S) H   (  91,X'S) 
RIDE C   (  10,X'S) H   ( 101,X'S) 
RIDE C   (  11,X'S) H   ( 111,X'S) H   ( 112,X'S) H   ( 113,X'S) 
RIDE C   (  12,X'S) H   ( 121,X'S) H   ( 122,X'S) H   ( 123,X'S) 
END                                                                             
;

_iucr_refine_instruction_details_restraints
;
#
# Punched on 24/11/11 at 14:27:42
#
#LIST     16                                                                    
NO 
REM   HREST   START (DO NOT REMOVE THIS LINE) 
REM   HREST   END (DO NOT REMOVE THIS LINE) 
END                                                                             
;
